# Supplementary material for: Synergetic argentophilic and through space electronic interactions in a single-crystal-to-single-crystal photocycloaddition reaction: a mechanistic study
Source: Royal Society of Chemistry journal article supplement (doi:10.1039/d3cp00838j), 2023-01-01
Supplement: d3cp00838j1.pdf [file d3cp00838j1.pdf]

*Electronic Supplementary Information for:*

## Synergetic argentophilic and through space electronic interactions in single-crystal-to-single-crystal photocycloaddition reaction: a mechanistic study

Wenjing Yang,<sup>a</sup> Yonglin Chen,<sup>a</sup> Min Mei,<sup>d</sup> Weijia Li,<sup>c</sup> Chu Wang,<sup>c</sup> Yanting Yang,<sup>c</sup> Jing Liang,<sup>c</sup> Zhen Guo,<sup>\*a</sup> Liangliang Wu<sup>\*b</sup> and Xuebo Chen<sup>\*c</sup>

a. College of Materials Science & Engineering, Key Laboratory of Interface Science and Engineering in Advanced Materials, Ministry of Education, Taiyuan University of Technology, Taiyuan, Shanxi, 030024, P.R. China.

b. Laboratory of Beam Technology and Energy Materials, Advanced Institute of Natural Sciences, Beijing Normal University, Zhuhai, 519087, P.R. China.

c. Key Laboratory of Theoretical and Computational Photochemistry of Ministry of Education, Department of Chemistry, Beijing Normal University, Xin-wai-da-jie No.19, Beijing, 100875, P.R. China.

d. College of Science, Hunan College For Preschool Education, Changde, Hunan, 415000, P.R. China.

Email: xuebochen@bnu.edu.cn(CX); llwu@bnu.edu.cn(WL); guozhen@tyut.edu.cn(GZ)

## Contents

|      |                                                                                  |     |
|------|----------------------------------------------------------------------------------|-----|
| S1   | Computational Details.....                                                       | S3  |
| S1.1 | Model Setup.....                                                                 | S3  |
| S1.2 | QM/MM Computational Protocol.....                                                | S3  |
| S1.3 | QM Method.....                                                                   | S3  |
| S1.4 | Packages and Tool.....                                                           | S6  |
| S1.5 | ISC rate constant calculation.....                                               | S7  |
| S1.6 | Rate constant calculations with the transition state theory.....                 | S7  |
| S1.7 | Irradiative rates calculation.....                                               | S8  |
| S1.8 | References.....                                                                  | S8  |
| S2   | Orbital analysis of Ag- $\sigma$ in $S_{ALP\Sigma}$ ( $^1\pi\sigma$ ) state..... | S10 |
| S3   | Supplementary Figures.....                                                       | S10 |
| S3.1 | Pedal-like Conformational Change.....                                            | S10 |
| S4   | Supplementary Tables .....                                                       | S13 |
| S5   | Cartesian Coordinates.....                                                       | S28 |

## **S1. Computational Details**

### **S1.1 Model Setup**

The X-ray crystal structure of  $[\text{Ag}_2\text{-(4-pyr-ph-cb)}_2][\text{CF}_3\text{SO}_3]_2$  (CCDC 945408) was used to construct the initial QM/MM model.<sup>[1]</sup> There were 31 crystal units of  $[\text{Ag}_2\text{-(4-pyr-ph-cb)}_2][\text{CF}_3\text{SO}_3]_2$  included in the model, accounting for a total number of 3658 atoms. The AMBER-parm99 force field<sup>[2]</sup> was employed for the chosen system. The charge distribution of  $[\text{Ag}_2\text{-(4-pyr-ph-cb)}_2][\text{CF}_3\text{SO}_3]_2$  were recalculated with restrained electrostatic potential (RESP) using the tleap module of AMBER10.<sup>[3]</sup> Because the parameters for Ag(I) is not available in the general Amber force field (GAFF), we used the same force constants as Cu(I) for instead in the MM minimization,<sup>[4]</sup> which has turned to be reasonable in our investigations.

### **S1.2 QM/MM Computational Protocol**

The QM/MM partitioning chosen are shown in Figure S1. To describe the [2+2] photodimerization accurately,  $[\text{Ag}_2\text{-(4-pyr-ph-cb)}_2]^{2+}$  with 102 atoms is only adopted in the QM subsystem. The MM subsystem includes the other 30 molecules of  $[\text{Ag}_2\text{-(4-pyr-ph-cb)}_2]^{2+}$  and their counterpart anions.

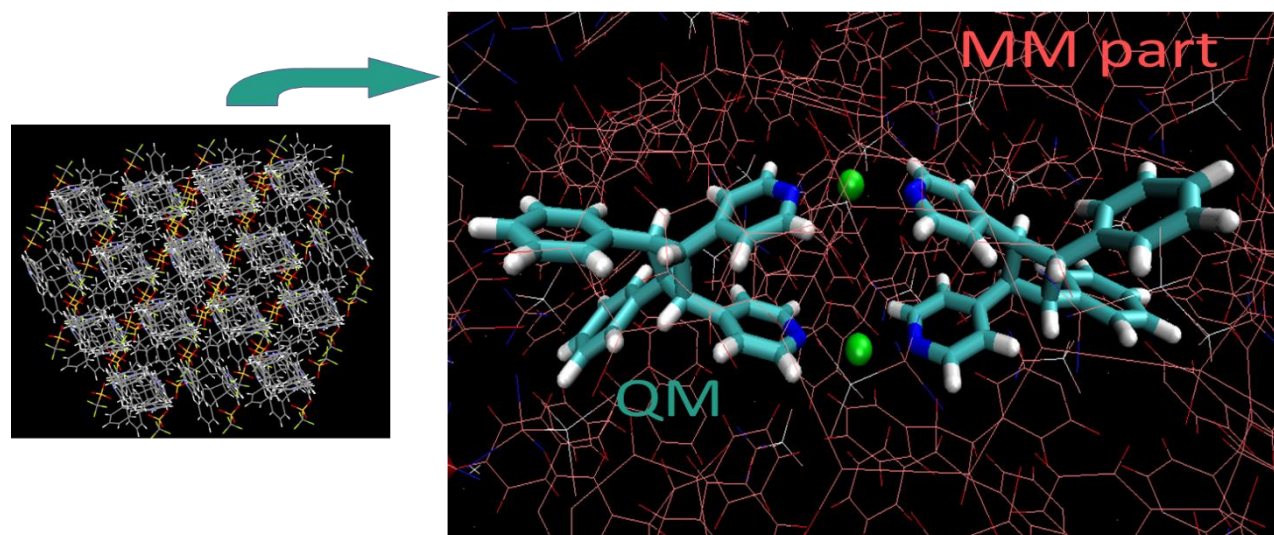

*Fig. S1 Illustration of the QM/MM computational model.*

### **S1.3 QM Method:**

The pedal-like conformational change of the QM part have been studied using the density functional theory (DFT) with the B3LYP functional. The stationary structures and

scanned transition states are obtained. The minimum energy profile (MEP) is mapped via intrinsic reaction coordinate (IRC)<sup>[5]</sup> computations to connect the above critical points.

The [2+2] photodimerization calculations of the QM parts after the pedal motion are conducted with the complete active space self-consistent field (CASSCF) method.<sup>[6]</sup> To consider dynamic electron correlation effects, the single-point energies of the optimized geometries are recalculated at the multi-configuration second-order perturbation (CASPT2) level of theory.<sup>[7]</sup> The active space of 10 electrons in 10 orbitals (10e/10o) is applied. These orbitals are schematically shown in Figure S2 and Figure S3, which includes  $d_z^2$  orbital of Ag(I),  $\sigma$  orbital of Ag...Ag and the rest high-lying occupied  $\pi$  and low-lying  $\pi^*$  orbitals that are mainly distributed in the 4-stilbz moiety. For Ag(I) ions, we chose the energy-consistent scalar-relativistic WB-adjusted 28-electron core pseudopotential<sup>[8-9]</sup> associated with the optimized (8s7p6d)/[6s5p3d] valence basis set to account for the relativistic effects involved. The pseudopotentials and basis set of the Ag atoms can be found in the homepage of the Dolg group (<http://www.tc.uni-koeln.de/PP/index.en.html>) and the basis set library of the Molcas program package.<sup>[10]</sup> The 6-31G\* basis set is applied for the carbon atoms of C=C double bonds in the reaction center, while the STO-3G basis set is adopted for the rest C, H, N atoms. Due to the limitation of computer memory for CASPT2 computations with 102 atoms, the 6-31G basis set for C=C is used in the single point energy calculations. The critical points including minima, conical intersections, and singlet-triplet state crossings, are explicitly optimized by using the state-averaged CASSCF method. A two-roots equally weighted (0.5:0.5) or three-roots differently weighted (0.0:0.5:0.5) state-averaged approach is used for critical points in the excited states, whereas single root optimization is adopted in the ground and the lowest-lying triplet state. Single-point energy corrections at all optimized structures are determined from the 5-root state-averaged CASPT2//CASSCF calculations to include dynamical electron correlation. The calculations are performed without an ionization potential-electron affinity (IPEA) shift but included an energy level shift of 0.2 a.u. to avoid intruder state problems.

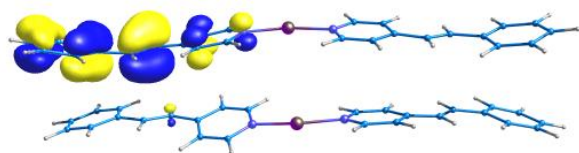

$\pi$  orbital

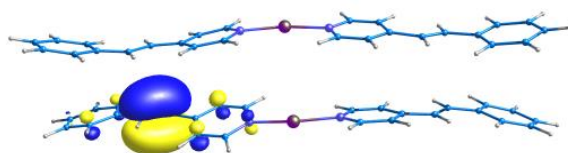

$\pi$  orbital

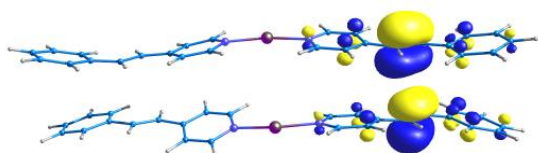

$\pi$  orbital

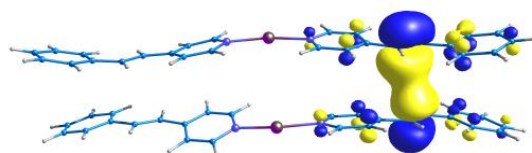

$\pi$  orbital

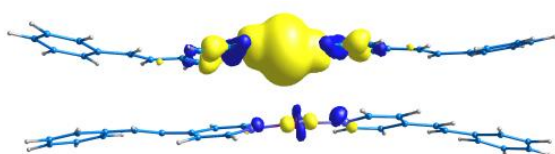

$d_z^2$  orbital

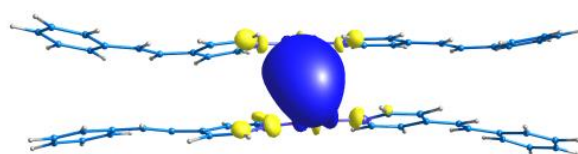

$\sigma$  orbital

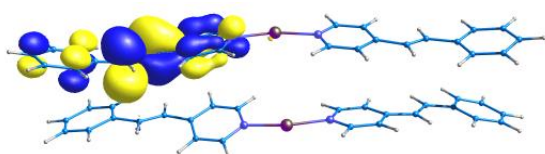

$\pi^*$  orbital

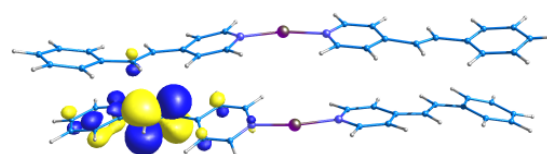

$\pi^*$  orbital

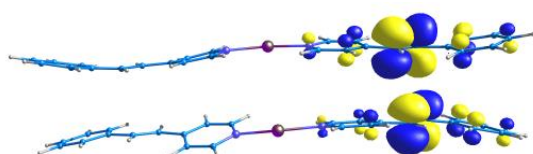

$\pi^*$  orbital

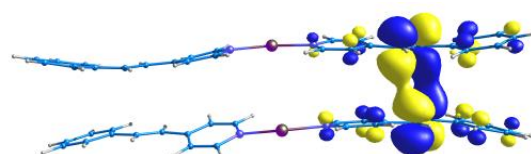

$\pi^*$  orbital

**Fig. S2** Molecular orbitals of **I** used in defining the active space for the CASPT2//CASSCF (10e/10o) calculations of the first [2+2] PCA reaction.

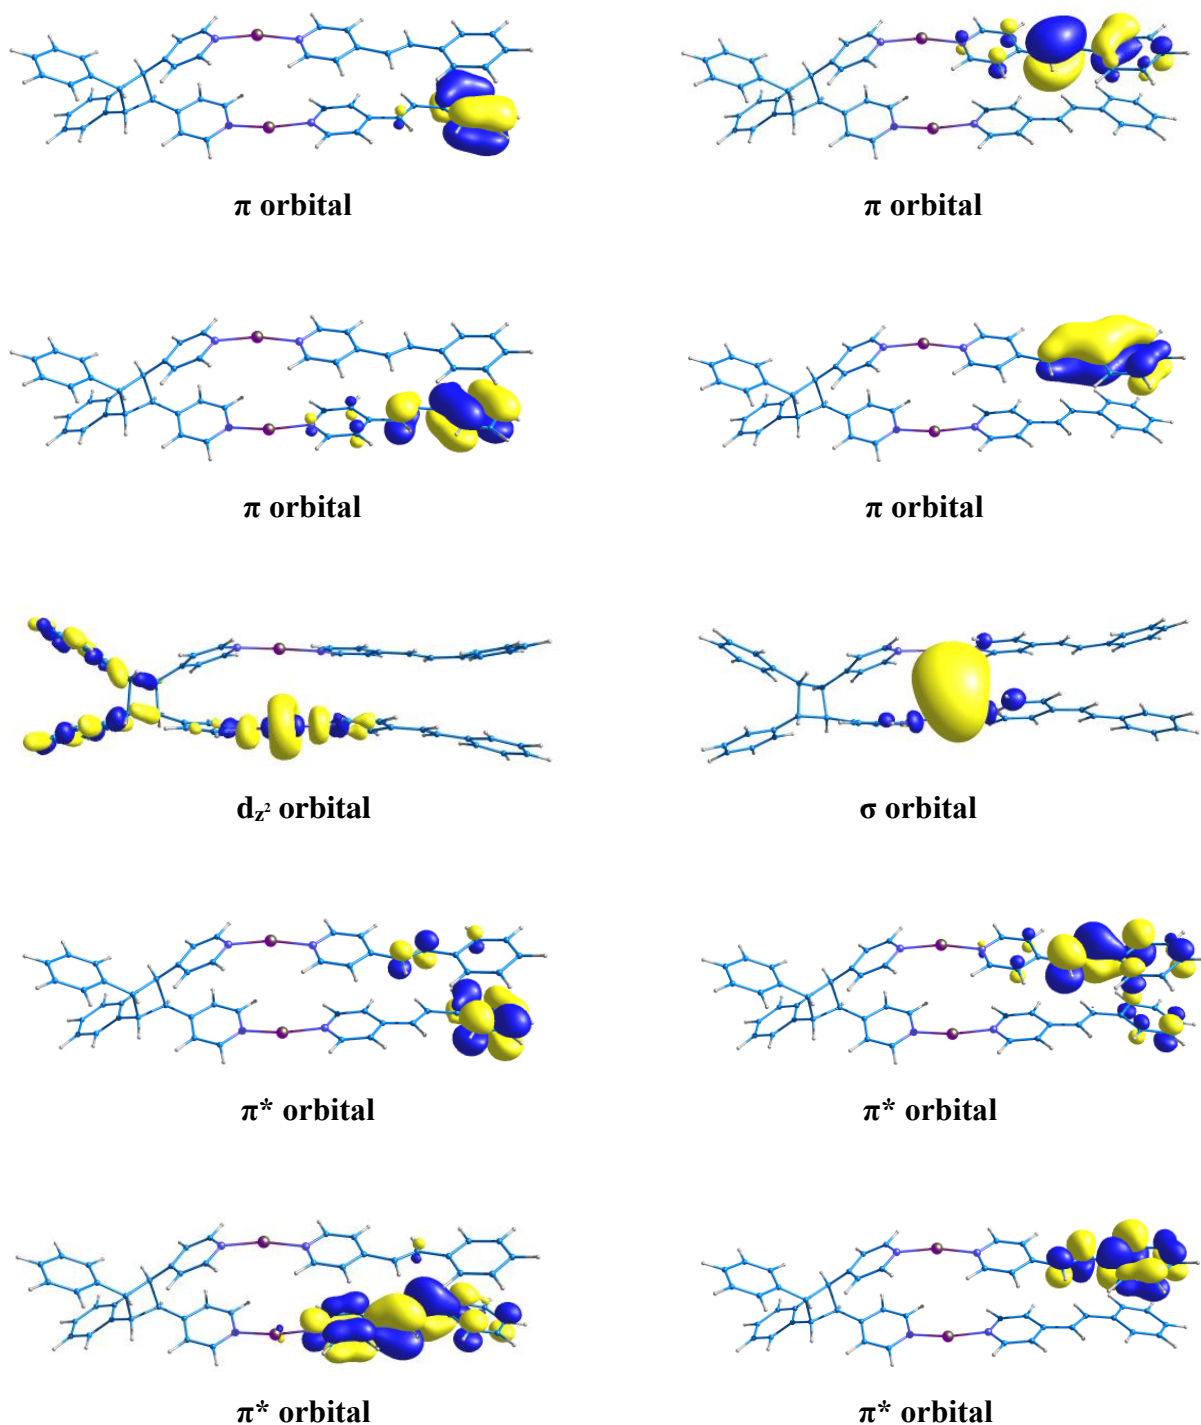

**Fig. S3** Molecular orbitals of **Reactant 2** used in defining the active space for the CASPT2//CASSCF (10e/10o) calculations of the second [2+2] PCA reaction.

### **S1.4 Packages and Tool**

The DFT and CASSCF computations are performed using GAUSSIAN03.<sup>[11]</sup> The CASPT2 calculations for QM part are conducted with Molcas program package.<sup>[12]</sup> The MM energy minimizations are treated with the AMBER99<sup>[2]</sup> force field using TINKER4.2 package.<sup>[13]</sup>

The theoretical investigations of intermolecular interactions in the crystal structures of  $[\text{Ag}_2(4\text{-stilbz})_4][\text{CO}_2\text{CF}_3]_2$  are investigated via Hirshfeld surface analysis (Isovalue: 0.5) using Crystal Explorer 17.5. [14]

### **S1.5 ISC rate constant calculation**

The ISC rates<sup>[15]</sup> between singlet and triplet state for [2+2] PCA reaction are estimated by eq. 1

$$k_{ISC}^{IF} = \frac{2\pi}{h} \cdot \langle {}^1\Psi_0^I | H_{SO} | {}^3\Psi_0^F \rangle^2 \cdot |\langle X_0 | X_n \rangle|^2 \cdot \rho \quad (\text{eq.1})$$

Where  $k_{ISC}^{IF}$  : the rate constant for ISC,  $\langle {}^1\Psi_0^I | H_{SO} | {}^3\Psi_0^F \rangle$  : the electronic coupling between the initial and final states,  $|\langle X_0 | X_n \rangle|$  : Franck–Condon factor, the value is 1,  $\rho = \frac{1}{\Delta E^{IF}}$  : the reciprocal of the energy difference between the initial state and the final state.

### **S1.6 Rate constant calculations with the transition state theory**

The rates via an energy barrier in an adiabatic potential energy surface can be estimated using the transition state theory as follows (eq.2)

$$k_{TS} = \frac{k_B T}{h} \exp \left[ -\frac{\Delta G^\ddagger}{k_B T} \right] \quad (\text{eq.2})$$

In which  $k_{TS}$  is the rate constant for chemical reaction,  $\Delta G^\ddagger$  is the Gibbs free energy barrier,  $k_B$  is the Boltzmann constant ( $8.62 \times 10^{-5}$  eV/K) and T is the absolute temperature (298 K). Although the value of  $\Delta G^\ddagger$  can be obtained by frequency analyses as the sum of potential energy barrier ( $\Delta E^\ddagger$ ) and the Gibbs correction, we should not overlook the anharmonic effect in the **1** complex under low-frequency vibrational mode. The TST rate obtained using  $\Delta E^\ddagger$  can be considered as the lower bound of an accurate value since  $\Delta G^\ddagger$  is usually smaller than  $\Delta E^\ddagger$ . On one hand, we can reoptimize the minima and transition states at the TD-B3LYP/PCM level, then the frequency analyses to correct the Gibbs free energy. On the other hand, if the geometries optimized at the DFT level are similar to the CASSCF results, add the correction terms to the potential energy barriers at the CASPT2//CASSCF level. The realistic process may take place at the rates ranging from  $k_{TS}(\Delta E^\ddagger)$  as a lower bound to  $k_{TS}(\Delta G^\ddagger)$  as an upper bound.

## S1.7 Irradiative rates calculation

The irradiative rates<sup>[16]</sup> (fluorescence and phosphorescence) are calculated as follows (eq.3)

$$k_r^{F/P} = \frac{2\pi\nu^2 e^2}{\epsilon_0 m c^3} f_{S_{ALPP} \rightarrow S_0} \quad (\text{eq.3})$$

in which  $\nu$  is the emission energy,  $e$  is the elementary electric charge,  $\epsilon_0$  is the vacuum permittivity,  $m$  is the mass of an electron,  $c$  is the speed of light, and  $f_{S_{ALPP} \rightarrow S_0}$  is the oscillator strength of the  $S_{ALPP} \rightarrow S_0$  radiative transition.

## S1.8 References:

- [1] K. M. Hutchins, T. P. Rupasinghe, L. R. Ditzler, D. C. Swenson, J. R. Sander, J. Baltrusaitis, A. V. Tivanski and L. R. MacGillivray, *J. Am. Chem. Soc.*, **2014**, *136*, 6778-6781.
- [2] J. Wang, P. Cieplak and P. A. Kollman, *J. Comput. Chem.*, **2000**, *21*, 1049-1074.
- [3] D. A. Case, T. A. Darden, T. E. Cheatham III, C. L. Simmerling, J. Wang, R. E. Duke, R. Luo, K. M. Merz, D. A. Pearlman, M. Crowley, R. C. Walker, W. Zhang, B. Wang, S. Hayik, A. Roitberg, G. Seabra, K. F. Wong, F. Paesani, X. Wu, S. Brozell, V. Tsui, H. Gohlke, L. Yang, C. Tan, J. Mongan, V. Hornak, G. Cui, P. Beroza, D. H. Mathews, C. Schafmeister, W.S. Ross and P.A. Kollman, AMBER 10, University of California, San Francisco, **2008**.
- [4] R. Mera-Adasme, K. Sadeghian, D. Sundholm and C. Ochsenfeld, *J. Phys. Chem. B.*, **2014**, *118*, 13106-13111.
- [5] a) K. Fukui. *Acc. Chem. Res.*, **1981**, *14*, 363-368. b) H. P. Hratchian and H. B. Schlegel, *J. Chem. Phys.*, **2004**, *120*, 9918-9924.
- [6] a) B. O. Roos, P. R. Taylor and P. Sigbahn, *Chem. Phys.*, **1980**, *48*, 157-173. b) K. Ruedenberg, M. W. Schmidt, M. M. Gilbert and S. T. Elbert, *Chem. Phys.*, **1982**, *71*, 41-49
- [7] a) K. Andersson, P. A. Malmqvist, B. O. Roos, A. J. Sadlej and K. Wolinski, *J. Chem. Phys.*, **1990**, *94*, 5483-5488. b) K. Andersson, P. Å. Malmqvist and B. O. Roos, *J. Chem. Phys.*, **1992**, *96*, 1218-1226. c) R. Improta, F. Santoro and L. Blancafort, *Chem. Rev.*, **2016**, *116*, 3540-3593.



- [8] A. Bergner, M. Dolg, W. Küchle, H. Stoll and H. Preuss, *Mol. Phys.*, **1993**, *80*, 1431-1441.
- [9] M. Dolg and X. Cao, *Chem. Rev.*, **2012**, *112*, 403-480.
- [10] G. Karlström, R. Lindh, P.-Å. Malmqvist, B. O. Roos, U. Ryde, V. Veryazov, P.-O. Widmark, M. Cossi, B. Schimmelpfennig, P. Neogrady and L. Seijo, *Comput. Mater. Sci.*, **2003**, *28*, 222-239.
- [11] M. J. Frisch, G. W. Trucks, H. B. Schlegel, G. E. Scuseria, M. A. Robb, J. R. Cheeseman, Jr. J. A. Montgomery, T. Vreven, K. N. Kudin, J. C. Burant, J. M. Millam, S. S. Iyengar, J. Tomasi, V. Barone, B. Mennucci, M. Cossi, G. Scalmani, N. Rega, G. A. Petersson, H. Nakatsuji, M. Hada, M. Ehara, K. Toyota, R. Fukuda, J. Hasegawa, M. Ishida, T. Nakajima, Y. Honda, O. Kitao, H. Nakai, M. Klene, X. Li, J. E. Knox, H. P. Hratchian, J. B. Cross, C. Adamo, J. Jaramillo, R. Gomperts, R. E. Stratmann, O. Yazyev, A. J. Austin, R. Cammi, C. Pomelli, J. W. Ochterski, P. Y. Ayala, K. Morokuma, G. A. Voth, P. Salvador, J. J. Dannenberg, V. G. Zakrzewski, S. Dapprich, A. D. Daniels, M. C. Strain, O. Farkas, D. K. Malick, A. D. Rabuck, K. Raghavachari, J. B. Foresman, J. V. Ortiz, Q. Cui, A. G. Baboul, S. Clifford, J. Cioslowski, B. B. Stefanov, G. Liu, A. Liashenko, P. Piskorz, I. Komaromi, R. L. Martin, D. J. Fox, T. Keith, M. A. Al-Laham, C. Y. Peng, A. Nanayakkara, M. Challacombe, P. M. W. Gill, B. Johnson, W. Chen, M. W. Wong, C. González and J. A. Pople, *Gaussian03, Revision D.02*, Gaussian, Inc.: Pittsburgh, PA, **2004**.
- [12] G. Karlström, R. Lindh, P.-Å. Malmqvist, B. O. Roos, U. Ryde, V. Veryazov, P.-O. Widmark, M. Cossi, B. Schimmelpfennig, P. Neogrady and L. Seijo, *Comput. Mater. Sci.*, **2003**, *28*, 222-239.
- [13] J. W. Ponder and F. M. Richards. *J. Comput. Chem.*, **1987**, *8*, 1016-1024.
- [14] M. J. Turner, J. J. McKinnon, S. K. Wolff, D. J. Grimwood, P. R. Spackman, D. Jayatilaka and M. A. Spackman, *CrystalExplorer17*, University of Western Australia, **2017**.
- [15] C. M. Marian, *Wiley Interdiscip. Rev. Comput. Mol. Sci.*, **2012**, *2*, 187-203.
- [16] L. Peng, W. Chen and Z. Li, *J. Phys. Chem. C.*, **2021**, *125*, 27372-27380.

## S2 Orbital analysis of Ag- $\sigma$ in $S_{ALP\Sigma}$ ( $^1\pi\sigma$ ) state

$$\Phi_{\sigma} = 39.8\%Ag_{B-5s} + 20.4\%Ag_{B-5p} + 6.5\%Ag_{B-4d} + 27.9\%Ag_{A-5s} + 6.4\%Ag_{A-4d} \quad (\text{eq.4})$$

## S3. Supplementary Figures

### S3.1 Pedal-like Conformational Change

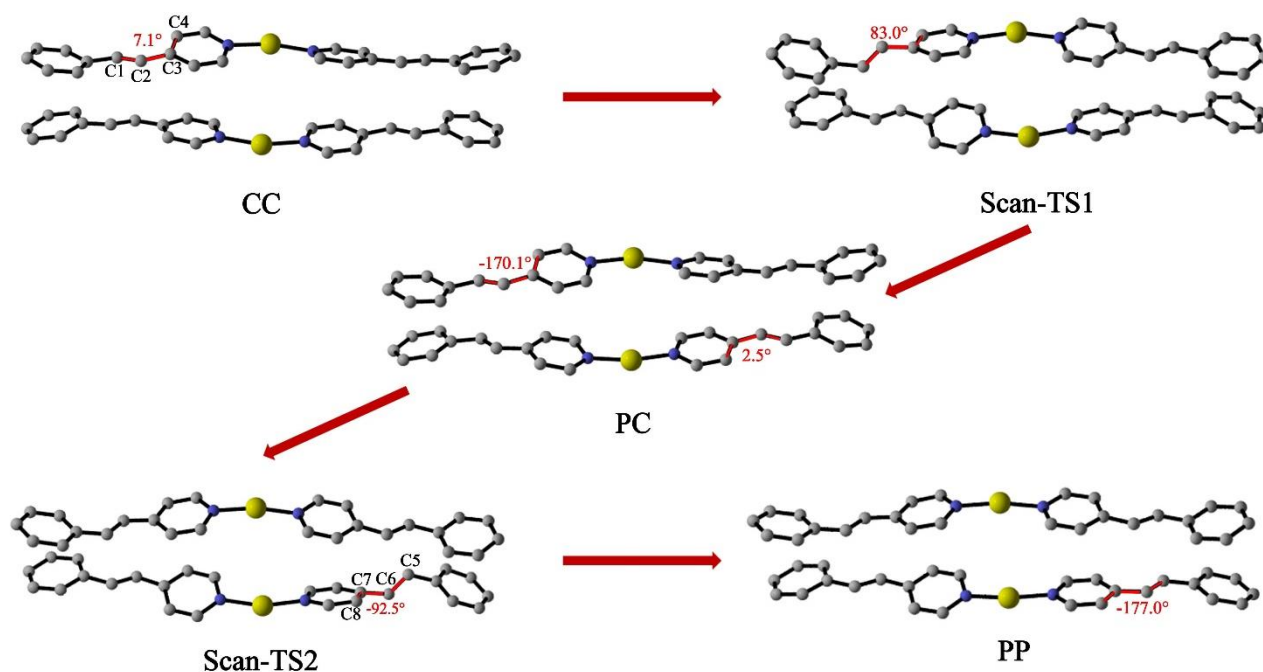

**Fig. S4** The molecule structure of the important point during the pedal motion. The red lines indicate the mode of torsional deformation, which are defined as the reaction coordinate of  $C1C2C3C4$ ,  $C5C6C7C8$  dihedral angles, respectively.

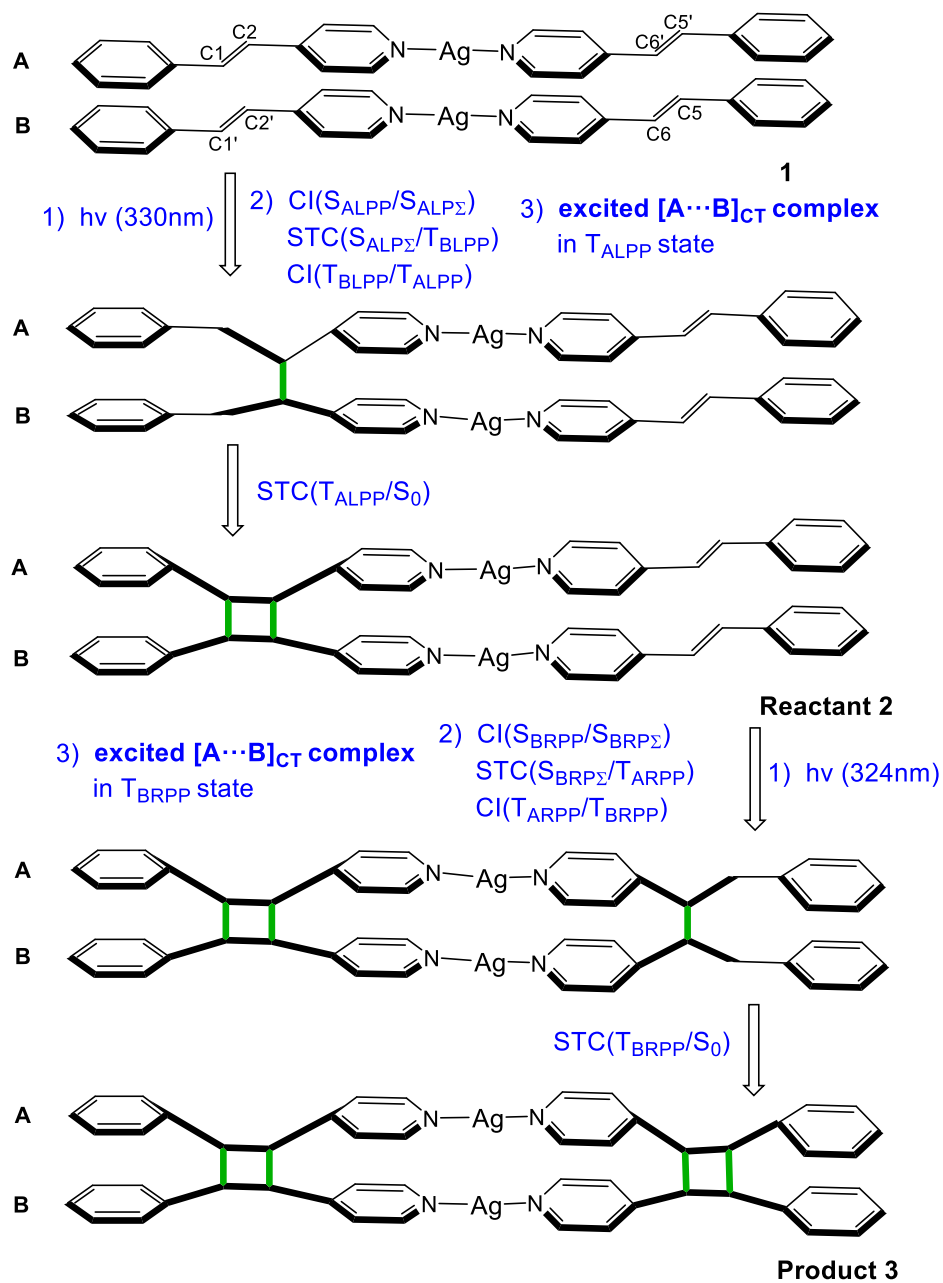

**Fig. S5** Schematic illustration of the photophysical and photochemical processes involved for the twice [2+2] PCA.

## S4. Supplementary Tables

**Table S1** Absolute energies (A.E., Hartree) and relative energies (R.E., kcal/mol) for the pedal motion from CC to PC by using the SCAN method. The corresponding energy profiles are plotted in Figure 1 (left pannel) of the main article.

| C1C2C3C4    | DFT (B3LYP)  |      |
|-------------|--------------|------|
|             | A.E          | R.E  |
| CC(-175.3°) | -2489.914686 | 0.0  |
| -172.3°     | -2489.914474 | 0.1  |
| -169.3°     | -2489.914177 | 0.3  |
| -166.3°     | -2489.913804 | 0.6  |
| -163.3°     | -2489.913363 | 0.8  |
| -160.3°     | -2489.912837 | 1.2  |
| -157.3°     | -2489.912217 | 1.5  |
| -154.3°     | -2489.911511 | 2.0  |
| -151.3°     | -2489.910699 | 2.5  |
| -148.3°     | -2489.909775 | 3.1  |
| -145.3°     | -2489.908735 | 3.7  |
| -142.3°     | -2489.907576 | 4.5  |
| -139.3°     | -2489.906285 | 5.3  |
| -136.3°     | -2489.904867 | 6.2  |
| -133.3°     | -2489.903315 | 7.1  |
| -130.3°     | -2489.901635 | 8.2  |
| -127.3°     | -2489.899829 | 9.3  |
| -124.3°     | -2489.897889 | 10.5 |
| -121.3°     | -2489.895833 | 11.8 |

|                          |              |      |
|--------------------------|--------------|------|
| <b>-118.3°</b>           | -2489.893656 | 13.2 |
| <b>-115.3°</b>           | -2489.891376 | 14.6 |
| <b>-112.3°</b>           | -2489.888987 | 16.1 |
| <b>-109.3°</b>           | -2489.887196 | 17.3 |
| <b>-106.3°(Scan-TS1)</b> | -2489.878753 | 22.5 |
| <b>-103.3°</b>           | -2489.879374 | 22.2 |
| <b>-100.3°</b>           | -2489.880123 | 21.7 |
| <b>-97.3°</b>            | -2489.880975 | 21.2 |
| <b>-94.3°</b>            | -2489.881923 | 20.6 |
| <b>-91.3°</b>            | -2489.882937 | 19.9 |
| <b>-88.3°</b>            | -2489.884004 | 19.3 |
| <b>-85.3°</b>            | -2489.885119 | 18.6 |
| <b>-82.3°</b>            | -2489.886276 | 17.8 |
| <b>-79.3°</b>            | -2489.887456 | 17.1 |
| <b>-76.3°</b>            | -2489.888659 | 16.3 |
| <b>-73.3°</b>            | -2489.889865 | 15.6 |
| <b>-70.3°</b>            | -2489.891063 | 14.8 |
| <b>-67.3°</b>            | -2489.89225  | 14.1 |
| <b>-64.3°</b>            | -2489.893412 | 13.3 |
| <b>-61.3°</b>            | -2489.894555 | 12.6 |
| <b>-58.3°</b>            | -2489.89566  | 11.9 |
| <b>-55.3°</b>            | -2489.896736 | 11.3 |
| <b>-52.3°</b>            | -2489.897774 | 10.6 |
| <b>-49.3°</b>            | -2489.898763 | 10.0 |

|                |              |     |
|----------------|--------------|-----|
| <b>-46.3°</b>  | -2489.899701 | 9.4 |
| <b>-43.3°</b>  | -2489.900584 | 8.8 |
| <b>-40.3°</b>  | -2489.901412 | 8.3 |
| <b>-37.3°</b>  | -2489.902175 | 7.9 |
| <b>-34.3°</b>  | -2489.902876 | 7.4 |
| <b>-31.3°</b>  | -2489.903521 | 7.0 |
| <b>-28.3°</b>  | -2489.904101 | 6.6 |
| <b>-25.3°</b>  | -2489.904625 | 6.3 |
| <b>-22.3°</b>  | -2489.905091 | 6.0 |
| <b>-19.3°</b>  | -2489.905508 | 5.8 |
| <b>-16.3°</b>  | -2489.905866 | 5.5 |
| <b>-13.3°</b>  | -2489.90617  | 5.3 |
| <b>-10.3°</b>  | -2489.906431 | 5.2 |
| <b>-7.3°</b>   | -2489.906639 | 5.0 |
| <b>-4.3°</b>   | -2489.906794 | 5.0 |
| <b>-1.3°</b>   | -2489.906904 | 4.9 |
| <b>1.7°</b>    | -2489.906966 | 4.8 |
| <b>4.7(PC)</b> | -2489.906997 | 4.8 |

**Table S2** Absolute energies (A.E., Hartree) and relative energies (R.E., kcal/mol) for the pedal motion from PC to PP by using the SCAN method. The corresponding energy profiles are plotted in Figure 1 (right pannel) of the main article.

| C5C6C7C8    | DFT (B3LYP)  |      |
|-------------|--------------|------|
|             | A.E          | R.E  |
| PC(-175.4°) | -2489.906923 | 4.9  |
| -178.4°     | -2489.906999 | 4.8  |
| 178.6°      | -2489.907011 | 4.8  |
| 175.6°      | -2489.906961 | 4.8  |
| 172.6°      | -2489.906845 | 4.9  |
| 169.6°      | -2489.906665 | 5.0  |
| 166.6°      | -2489.906423 | 5.2  |
| 163.6°      | -2489.906111 | 5.4  |
| 160.6°      | -2489.905729 | 5.6  |
| 157.6°      | -2489.905272 | 5.9  |
| 154.6°      | -2489.904743 | 6.2  |
| 151.6°      | -2489.904144 | 6.6  |
| 148.6°      | -2489.903465 | 7.0  |
| 145.6°      | -2489.902709 | 7.5  |
| 142.6°      | -2489.901878 | 8.0  |
| 139.6°      | -2489.900968 | 8.6  |
| 136.6°      | -2489.899968 | 9.2  |
| 133.6°      | -2489.898877 | 9.9  |
| 130.6°      | -2489.897697 | 10.7 |

|                         |              |      |
|-------------------------|--------------|------|
| <b>127.6°</b>           | -2489.896433 | 11.5 |
| <b>124.6°</b>           | -2489.895088 | 12.3 |
| <b>121.6°</b>           | -2489.893672 | 13.2 |
| <b>118.6°</b>           | -2489.89218  | 14.1 |
| <b>115.6°</b>           | -2489.890623 | 15.1 |
| <b>112.6°</b>           | -2489.889016 | 16.1 |
| <b>109.6°</b>           | -2489.88736  | 17.1 |
| <b>106.6°</b>           | -2489.885692 | 18.2 |
| <b>103.6°</b>           | -2489.883841 | 19.4 |
| <b>100.6°(Scan-TS2)</b> | -2489.878861 | 22.4 |
| <b>97.6°</b>            | -2489.879791 | 21.9 |
| <b>94.6°</b>            | -2489.880843 | 21.2 |
| <b>91.6°</b>            | -2489.881985 | 20.5 |
| <b>88.6°</b>            | -2489.883188 | 19.8 |
| <b>85.6°</b>            | -2489.88443  | 19.0 |
| <b>82.6°</b>            | -2489.885694 | 18.2 |
| <b>79.6°</b>            | -2489.886964 | 17.4 |
| <b>76.6°</b>            | -2489.888229 | 16.6 |
| <b>73.6°</b>            | -2489.889478 | 15.8 |
| <b>70.6°</b>            | -2489.890707 | 15.0 |
| <b>67.6°</b>            | -2489.891904 | 14.3 |
| <b>64.6°</b>            | -2489.893062 | 13.6 |
| <b>61.6°</b>            | -2489.894183 | 12.9 |
| <b>58.6°</b>            | -2489.895249 | 12.2 |



|                  |              |      |
|------------------|--------------|------|
| <b>55.6°</b>     | -2489.89626  | 11.6 |
| <b>52.6°</b>     | -2489.897214 | 11.0 |
| <b>49.6°</b>     | -2489.898107 | 10.4 |
| <b>46.6°</b>     | -2489.898945 | 9.9  |
| <b>43.6°</b>     | -2489.899721 | 9.4  |
| <b>40.6°</b>     | -2489.900434 | 8.9  |
| <b>37.6°</b>     | -2489.90109  | 8.5  |
| <b>34.6°</b>     | -2489.901672 | 8.2  |
| <b>31.6°</b>     | -2489.902192 | 7.8  |
| <b>28.6°</b>     | -2489.902657 | 7.5  |
| <b>25.6°</b>     | -2489.90306  | 7.3  |
| <b>22.6°</b>     | -2489.903698 | 6.9  |
| <b>19.6°</b>     | -2489.903698 | 6.9  |
| <b>16.6°</b>     | -2489.903936 | 6.7  |
| <b>13.6°</b>     | -2489.904124 | 6.6  |
| <b>10.6°</b>     | -2489.904256 | 6.5  |
| <b>7.6°</b>      | -2489.904328 | 6.5  |
| <b>4.6° (PP)</b> | -2489.90436  | 6.5  |

**Table S3** Absolute energies (A.E., Hartree), relative energies (R.E., kcal/mol) and MM energies (hartree) for the first [2+2] PCA reaction pathway. The corresponding energy profiles are plotted in Figure 3 (left pannel) of the main article.

| Reactant 1                                                                      | MM part  | CASPT2       |       |
|---------------------------------------------------------------------------------|----------|--------------|-------|
|                                                                                 | A.E.     | A.E.         | R.E.  |
| <b>S<sub>0</sub>-min</b>                                                        |          |              |       |
| Root1                                                                           | 7.699245 | -2485.124397 | 0     |
| Root2( <sup>1</sup> πσ)                                                         |          | -2484.977507 | 92.2  |
| Root3( <sup>1</sup> ππ*)                                                        |          | -2484.986228 | 86.6  |
| Root4                                                                           |          | -2484.911998 | 133.3 |
| Root5                                                                           |          | -2484.910573 | 134.2 |
| <b>S<sub>ALPP</sub>(<sup>1</sup>ππ*)-1</b>                                      |          |              |       |
| Root1                                                                           | 7.699244 | -2485.124369 | 0.1   |
| Root2( <sup>1</sup> πσ)                                                         |          | -2484.978294 | 91.7  |
| Root3( <sup>1</sup> ππ*)                                                        |          | -2484.986948 | 86.3  |
| Root4                                                                           |          | -2484.908674 | 135.4 |
| Root5                                                                           |          | -2484.903176 | 138.9 |
| <b>CI[S<sub>ALPP</sub>(<sup>1</sup>ππ*) / S<sub>ALPΣ</sub>(<sup>1</sup>πσ)]</b> |          |              |       |
| Root1                                                                           | 7.699078 | -2485.125733 | -0.9  |
| Root2( <sup>1</sup> ππ*)                                                        |          | -2484.993383 | 82.1  |
| Root3( <sup>1</sup> πσ)                                                         |          | -2484.98633  | 86.5  |
| Root4                                                                           |          | -2484.91692  | 130.1 |
| Root5                                                                           |          | -2484.912436 | 132.9 |
| <b>S<sub>ALPΣ</sub>(<sup>1</sup>πσ)-1</b>                                       |          |              |       |
| Root1                                                                           | 7.698385 | -2485.125716 | -1.3  |
| Root2( <sup>1</sup> πσ)                                                         |          | -2484.991187 | 83.1  |
| <b>S<sub>ALPΣ</sub>(<sup>1</sup>πσ)-2</b>                                       |          |              |       |
| Root1                                                                           | 7.697886 | -2485.125422 | -1.5  |
| Root2( <sup>1</sup> πσ)                                                         |          | -2484.990403 | 83.3  |

|                                                                                 |          |              |      |
|---------------------------------------------------------------------------------|----------|--------------|------|
| STC[S <sub>ALPΣ</sub> ( <sup>1</sup> πσ)/T <sub>BLPP</sub> ( <sup>3</sup> ππ*)] |          |              |      |
| Root1                                                                           | 7.697493 | -2485.125745 | -1.9 |
| Root2 ( <sup>1</sup> πσ)                                                        |          | -2484.994182 | 80.6 |
| Root3 ( <sup>3</sup> ππ*)                                                       |          | -2484.998971 | 77.6 |
|                                                                                 |          |              |      |
| T <sub>BLPP</sub> ( <sup>3</sup> ππ*)-1                                         |          |              |      |
| Root1 (S <sub>0</sub> )                                                         | 7.697492 | -2485.125744 | -1.9 |
| Root2 [T <sub>ALPP</sub> ( <sup>3</sup> ππ*)]                                   |          | -2485.030449 | 57.9 |
| Root3 [T <sub>BLPP</sub> ( <sup>3</sup> ππ*)]                                   |          | -2485.019606 | 64.7 |
|                                                                                 |          |              |      |
| T <sub>BLPP</sub> ( <sup>3</sup> ππ*)-2                                         |          |              |      |
| Root1 (S <sub>0</sub> )                                                         | 7.697481 | -2485.126111 | -1.8 |
| Root2 [T <sub>ALPP</sub> ( <sup>3</sup> ππ*)]                                   |          | -2485.030909 | 57.6 |
| Root3 [T <sub>BLPP</sub> ( <sup>3</sup> ππ*)]                                   |          | -2485.020972 | 63.8 |
|                                                                                 |          |              |      |
| T <sub>BLPP</sub> ( <sup>3</sup> ππ*)-3                                         |          |              |      |
| Root1 (S <sub>0</sub> )                                                         | 7.698147 | -2485.126020 | -1.7 |
| Root2 [T <sub>ALPP</sub> ( <sup>3</sup> ππ*)]                                   |          | -2485.030997 | 57.9 |
| Root3 [T <sub>BLPP</sub> ( <sup>3</sup> ππ*)]                                   |          | -2485.025263 | 61.5 |
|                                                                                 |          |              |      |
| CI[T <sub>BLPP</sub> ( <sup>3</sup> ππ*)/T <sub>ALPP</sub> ( <sup>3</sup> ππ*)] |          |              |      |
| Root1 (S <sub>0</sub> )                                                         | 7.697518 | -2485.122396 | 0.2  |
| Root2 [T <sub>ALPP</sub> ( <sup>3</sup> ππ*)]                                   |          | -2485.035113 | 55.0 |
| Root3 [T <sub>BLPP</sub> ( <sup>3</sup> ππ*)]                                   |          | -2485.029988 | 58.2 |
|                                                                                 |          |              |      |
| T <sub>ALPP</sub> ( <sup>3</sup> ππ*)-1                                         |          |              |      |
| Root1 (S <sub>0</sub> )                                                         | 7.705796 | -2485.120513 | 6.6  |
| Root2 ( <sup>3</sup> ππ*)                                                       |          | -2485.043657 | 54.8 |
|                                                                                 |          |              |      |
| T <sub>ALPP</sub> ( <sup>3</sup> ππ*)-2                                         |          |              |      |
| Root1 (S <sub>0</sub> )                                                         | 7.699863 | -2485.109848 | 9.5  |
| Root2 ( <sup>3</sup> ππ*)                                                       |          | -2485.044277 | 50.7 |
|                                                                                 |          |              |      |
| T <sub>ALPP</sub> ( <sup>3</sup> ππ*)-3                                         |          |              |      |
| Root1 (S <sub>0</sub> )                                                         | 7.69833  | -2485.109944 | 8.5  |

|                                 |          |              |      |
|---------------------------------|----------|--------------|------|
| Root2 ( $^3\pi\pi^*$ )          |          | -2485.047785 | 47.5 |
|                                 |          |              |      |
| $T_{ALPP}(^3\pi\pi^*)-4$        |          |              |      |
| Root1 ( $S_0$ )                 | 7.697883 | -2485.101324 | 13.7 |
| Root2 ( $^3\pi\pi^*$ )          |          | -2485.042485 | 50.6 |
|                                 |          |              |      |
| $T_{ALPP}(^3\pi\pi^*)-5$        |          |              |      |
| Root1 ( $S_0$ )                 | 7.695048 | -2485.095953 | 15.3 |
| Root2 ( $^3\pi\pi^*$ )          |          | -2485.035978 | 52.9 |
|                                 |          |              |      |
| $T_{ALPP}(^3\pi\pi^*)-6$        |          |              |      |
| Root1 ( $S_0$ )                 | 7.697115 | -2485.062326 | 37.6 |
| Root2 ( $^3\pi\pi^*$ )          |          | -2485.034724 | 54.9 |
|                                 |          |              |      |
| $T_{ALPP}(^3\pi\pi^*)-7$        |          |              |      |
| Root1 ( $S_0$ )                 | 7.695651 | -2485.054926 | 41.4 |
| Root2 ( $^3\pi\pi^*$ )          |          | -2485.038133 | 51.9 |
|                                 |          |              |      |
| $T_{ALPP}(^3\pi\pi^*)-8$        |          |              |      |
| Root1 ( $S_0$ )                 | 7.695783 | -2485.048239 | 45.7 |
| Root2 ( $^3\pi\pi^*$ )          |          | -2485.039504 | 51.1 |
|                                 |          |              |      |
| $T_{ALPP}(^3\pi\pi^*)-9$        |          |              |      |
| Root1 ( $S_0$ )                 | 7.695832 | -2485.046593 | 46.7 |
| Root2 ( $^3\pi\pi^*$ )          |          | -2485.040639 | 50.5 |
|                                 |          |              |      |
| $STC[T_{ALPP}(^3\pi\pi^*)/S_0]$ |          |              |      |
| Root1 ( $S_0$ )                 | 7.695056 | -2485.045236 | 47.1 |
| Root2 ( $^3\pi\pi^*$ )          |          | -2485.040083 | 50.3 |
|                                 |          |              |      |
| $S_0-1$                         |          |              |      |
| Root1                           | 7.694177 | -2485.065774 | 33.6 |
|                                 |          |              |      |
| $S_0-2$                         |          |              |      |
| Root1                           | 7.693539 | -2485.076066 | 26.8 |

|                    |                   |              |      |
|--------------------|-------------------|--------------|------|
| S <sub>0</sub> -3  |                   |              |      |
| Root1              | 7.693222          | -2485.077749 | 25.5 |
| S <sub>0</sub> -4  |                   |              |      |
| Root1              | 7.691937          | -2485.079478 | 23.6 |
| S <sub>0</sub> -5  |                   |              |      |
| Root1              | 7.691499          | -2485.090956 | 16.2 |
| S <sub>0</sub> -6  |                   |              |      |
| Root1              | 7.69107           | -2485.098003 | 11.5 |
| S <sub>0</sub> -7  |                   |              |      |
| Root1              | 7.690817          | -2485.10395  | 7.6  |
| S <sub>0</sub> -8  |                   |              |      |
| Root1              | 7.690419          | -2485.108252 | 4.6  |
| S <sub>0</sub> -9  |                   |              |      |
| Root1              | 7.688541          | -2485.111988 | 1.1  |
| S <sub>0</sub> -10 | <b>Reactant 2</b> |              |      |
| Root1              | 7.689816          | -2485.121724 | -4.2 |

**Table S4** Absolute energies (A.E., Hartree), relative energies (R.E., kcal/mol) and MM energies (hartree) for the second [2+2] PCA reaction pathway. The corresponding energy profiles are plotted in Figure 3 (right pannel) of the main article.

| Reactant 2                                                                    | MM part  | CASPT2       |       |
|-------------------------------------------------------------------------------|----------|--------------|-------|
|                                                                               | A.E.     | A.E.         | R.E.  |
| <b>S<sub>0</sub>-min</b>                                                      |          |              |       |
| Root1                                                                         | 7.687563 | -2485.102217 | 0     |
| Root2                                                                         |          | -2484.955996 | 91.8  |
| Root3 ( <sup>1</sup> πσ)                                                      |          | -2484.941363 | 100.9 |
| Root4 ( <sup>1</sup> ππ*)                                                     |          | -2484.961517 | 88.2  |
| Root5                                                                         |          | -2484.913976 | 118.1 |
| <b>S<sub>BRPP</sub>(<sup>1</sup>ππ*)-1</b>                                    |          |              |       |
| Root1                                                                         | 7.688202 | -2485.103127 | 0.2   |
| Root2 ( <sup>1</sup> ππ*)                                                     |          | -2484.966572 | 85.5  |
| Root3 ( <sup>1</sup> πσ)                                                      |          | -2484.953525 | 93.7  |
| Root4                                                                         |          | -2484.942131 | 100.9 |
| Root5                                                                         |          | -2484.948946 | 96.6  |
| <b>CI[S<sub>BRPP</sub>(<sup>1</sup>ππ*)/S<sub>BRPΣ</sub>(<sup>1</sup>πσ)]</b> |          |              |       |
| Root1                                                                         | 7.688280 | -2485.099533 | 2.1   |
| Root2 ( <sup>1</sup> πσ)                                                      |          | -2484.962099 | 88.3  |
| Root3 ( <sup>1</sup> ππ*)                                                     |          | -2484.966528 | 85.6  |
| Root4                                                                         |          | -2484.951375 | 95.1  |
| Root5                                                                         |          | -2484.933404 | 106.4 |
| <b>S<sub>BRPΣ</sub>(<sup>1</sup>πσ)-1</b>                                     |          |              |       |
| Root1                                                                         | 7.687729 | -2485.098664 | 2.3   |
| Root2 ( <sup>1</sup> πσ)                                                      |          | -2484.963994 | 86.6  |
| <b>S<sub>BRPΣ</sub>(<sup>1</sup>πσ)-2</b>                                     |          |              |       |
| Root1                                                                         | 7.687919 | -2485.099516 | 1.9   |
| Root2 ( <sup>1</sup> πσ)                                                      |          | -2484.964877 | 86.4  |

|                                                        |          |              |      |
|--------------------------------------------------------|----------|--------------|------|
| $S_{BRP\Sigma}(^1\pi\sigma)-3$                         |          |              |      |
| Root1                                                  | 7.688091 | -2485.099710 | 1.9  |
| Root2 ( $^1\pi\sigma$ )                                |          | -2484.967087 | 85.1 |
| $STC[S_{BRP\Sigma}(^1\pi\sigma)/T_{ARPP}(^3\pi\pi^*)]$ |          |              |      |
| Root1                                                  | 7.689394 | -2485.101185 | 1.8  |
| Root2 ( $^1\pi\sigma$ )                                |          | -2484.971889 | 82.9 |
| Root3 ( $^3\pi\pi^*$ )                                 |          | -2484.975961 | 80.3 |
| $T_{ARPP}(^3\pi\pi^*)-1$                               |          |              |      |
| Root1 ( $S_0$ )                                        | 7.688844 | -2485.101437 | 1.3  |
| Root2 [ $T_{BRPP}(^3\pi\pi^*)$ ]                       |          | -2485.014964 | 55.6 |
| Root3 [ $T_{ARPP}(^3\pi\pi^*)$ ]                       |          | -2484.991673 | 70.2 |
| $T_{ARPP}(^3\pi\pi^*)-2$                               |          |              |      |
| Root1 ( $S_0$ )                                        | 7.688280 | -2485.099539 | 2.1  |
| Root2 [ $T_{BRPP}(^3\pi\pi^*)$ ]                       |          | -2485.014525 | 55.5 |
| Root3 [ $T_{ARPP}(^3\pi\pi^*)$ ]                       |          | -2485.005542 | 61.1 |
| $T_{ARPP}(^3\pi\pi^*)-3$                               |          |              |      |
| Root1 ( $S_0$ )                                        | 7.688232 | -2485.099993 | 1.8  |
| Root2 [ $T_{BRPP}(^3\pi\pi^*)$ ]                       |          | -2485.007298 | 59.9 |
| Root3 [ $T_{ARPP}(^3\pi\pi^*)$ ]                       |          | -2485.010386 | 58.0 |
| $CI[T_{ARPP}(^3\pi\pi^*)/T_{BRPP}(^3\pi\pi^*)]$        |          |              |      |
| Root1 ( $S_0$ )                                        | 7.688218 | -2485.099840 | 1.9  |
| Root2 [ $T_{ARPP}(^3\pi\pi^*)$ ]                       |          | -2485.010839 | 57.8 |
| Root3 [ $T_{BRPP}(^3\pi\pi^*)$ ]                       |          | -2485.012939 | 56.5 |
| $T_{BRPP}(^3\pi\pi^*)-1$                               |          |              |      |
| Root1 ( $S_0$ )                                        | 7.689531 | -2485.089798 | 9.0  |
| Root2 ( $^3\pi\pi^*$ )                                 |          | -2485.021710 | 51.8 |
| $T_{BRPP}(^3\pi\pi^*)-2$                               |          |              |      |

|                                                              |          |              |      |
|--------------------------------------------------------------|----------|--------------|------|
| Root1 ( $S_0$ )                                              | 7.688179 | -2485.086523 | 10.2 |
| Root2 ( $^3\pi\pi^*$ )                                       |          | -2485.022694 | 50.3 |
| $T_{BRPP}(^3\pi\pi^*)-3$                                     |          |              |      |
| Root1 ( $S_0$ )                                              | 7.690321 | -2485.079032 | 16.3 |
| Root2 ( $^3\pi\pi^*$ )                                       |          | -2485.025537 | 49.9 |
| $T_{BRPP}(^3\pi\pi^*)-4$                                     |          |              |      |
| Root1 ( $S_0$ )                                              | 7.690300 | -2485.077187 | 17.5 |
| Root2 ( $^3\pi\pi^*$ )                                       |          | -2485.025980 | 49.6 |
| $T_{BRPP}(^3\pi\pi^*)-5$ <b>[A...B]<sub>CT</sub> complex</b> |          |              |      |
| Root1 ( $S_0$ )                                              | 7.687866 | -2485.074005 | 17.9 |
| Root2 ( $^3\pi\pi^*$ )                                       |          | -2485.024648 | 48.9 |
| $T_{BRPP}(^3\pi\pi^*)-6$                                     |          |              |      |
| Root1 ( $S_0$ )                                              | 7.686438 | -2485.071251 | 18.8 |
| Root2 ( $^3\pi\pi^*$ )                                       |          | -2485.019099 | 51.5 |
| $T_{BRPP}(^3\pi\pi^*)-7$                                     |          |              |      |
| Root1 ( $S_0$ )                                              | 7.686470 | -2485.064752 | 22.8 |
| Root2 ( $^3\pi\pi^*$ )                                       |          | -2485.014697 | 54.3 |
| $T_{BRPP}(^3\pi\pi^*)-8$                                     |          |              |      |
| Root1 ( $S_0$ )                                              | 7.686266 | -2485.058765 | 26.5 |
| Root2 ( $^3\pi\pi^*$ )                                       |          | -2485.010329 | 56.9 |
| $T_{BRPP}(^3\pi\pi^*)-9$                                     |          |              |      |
| Root1 ( $S_0$ )                                              | 7.687739 | -2485.058059 | 26.9 |
| Root2 ( $^3\pi\pi^*$ )                                       |          | -2485.012017 | 56.7 |
| $T_{BRPP}(^3\pi\pi^*)-10$                                    |          |              |      |
| Root1 ( $S_0$ )                                              | 7.685790 | -2485.050186 | 32.0 |
| Root2 ( $^3\pi\pi^*$ )                                       |          | -2485.009062 | 57.5 |



|                                   |          |              |      |
|-----------------------------------|----------|--------------|------|
| $T_{BRPP}({}^3\pi\pi^*)-11$       |          |              |      |
| Root1( $S_0$ )                    | 7.686178 | -2485.049854 | 32.5 |
| Root2( ${}^3\pi\pi^*$ )           |          | -2485.018249 | 51.9 |
| $T_{BRPP}({}^3\pi\pi^*)-12$       |          |              |      |
| Root1( $S_0$ )                    | 7.686482 | -2485.047008 | 34.6 |
| Root2( ${}^3\pi\pi^*$ )           |          | -2485.019864 | 51.0 |
| $T_{BRPP}({}^3\pi\pi^*)-13$       |          |              |      |
| Root1( $S_0$ )                    | 7.686867 | -2485.046904 | 34.7 |
| Root2( ${}^3\pi\pi^*$ )           |          | -2485.028464 | 45.9 |
| $T_{BRPP}({}^3\pi\pi^*)-14$       |          |              |      |
| Root1( $S_0$ )                    | 7.687504 | -2485.046840 | 34.7 |
| Root2( ${}^3\pi\pi^*$ )           |          | -2485.037477 | 40.6 |
| $T_{BRPP}({}^3\pi\pi^*)-15$       |          |              |      |
| Root1( $S_0$ )                    | 7.687546 | -2485.044193 | 36.4 |
| Root2( ${}^3\pi\pi^*$ )           |          | -2485.039023 | 39.7 |
| $STC[T_{BRPP}({}^3\pi\pi^*)/S_0]$ |          |              |      |
| Root1 ( $S_0$ )                   | 7.688415 | -2485.044746 | 36.6 |
| Root2 ( ${}^3\pi\pi^*$ )          |          | -2485.042261 | 38.2 |
| $S_0-1$                           |          |              |      |
| Root1                             | 7.687462 | -2485.051809 | 31.6 |
| $S_0-2$                           |          |              |      |
| Root1                             | 7.687643 | -2485.059597 | 26.8 |
| $S_0-3$                           |          |              |      |
| Root1                             | 7.687235 | -2485.066961 | 21.9 |
| $S_0-4$                           |          |              |      |
| Root1                             | 7.687535 | -2485.069258 | 20.7 |

|                  |                  |              |      |
|------------------|------------------|--------------|------|
|                  |                  |              |      |
| S <sub>0-5</sub> |                  |              |      |
| Root1            | 7.687564         | -2485.080187 | 13.9 |
|                  |                  |              |      |
| S <sub>0-6</sub> | <b>Product 3</b> |              |      |
| Root1            | 7.685196         | -2485.092091 | 4.9  |

## S5. Cartesian Coordinates

### Coordinates for Fig. 2

CC

|    |              |              |              |
|----|--------------|--------------|--------------|
| Ag | 10.554080000 | 1.062758000  | 3.891748000  |
| Ag | 9.946517000  | 5.766095000  | 5.125157000  |
| C  | 6.463159000  | 2.435894000  | 4.154293000  |
| H  | 5.975974000  | 3.341597000  | 3.764156000  |
| C  | 7.819602000  | 2.227600000  | 3.879825000  |
| H  | 8.406237000  | 2.966803000  | 3.310322000  |
| N  | 8.516943000  | 1.095769000  | 4.326208000  |
| C  | 7.777089000  | 0.133980000  | 5.018366000  |
| H  | 8.335423000  | -0.776661000 | 5.292253000  |
| C  | 6.428120000  | 0.311822000  | 5.346673000  |
| H  | 5.904400000  | -0.480700000 | 5.897463000  |
| C  | 5.740288000  | 1.500029000  | 4.955741000  |
| C  | 4.358266000  | 1.796390000  | 5.320805000  |
| H  | 3.897693000  | 2.600011000  | 4.752390000  |
| C  | 3.647540000  | 1.198492000  | 6.307937000  |
| H  | 4.147306000  | 0.424376000  | 6.893328000  |
| C  | 2.236182000  | 1.380029000  | 6.634854000  |
| C  | 1.646267000  | 0.427805000  | 7.516898000  |
| H  | 2.293011000  | -0.301377000 | 8.026634000  |
| C  | 0.252694000  | 0.363014000  | 7.672257000  |
| H  | -0.170576000 | -0.414629000 | 8.318265000  |
| C  | -0.581651000 | 1.269284000  | 6.983525000  |
| H  | -1.676149000 | 1.210432000  | 7.078959000  |
| C  | -0.006908000 | 2.259336000  | 6.150800000  |
| H  | -0.657091000 | 2.964315000  | 5.614576000  |
| C  | 1.383144000  | 2.320228000  | 5.979533000  |
| H  | 1.813764000  | 3.085548000  | 5.322153000  |
| C  | 12.800141000 | 3.290017000  | 0.956999000  |
| H  | 12.482010000 | 3.993150000  | 0.175758000  |
| C  | 11.845388000 | 2.737962000  | 1.814832000  |
| H  | 10.775326000 | 2.987523000  | 1.734605000  |
| N  | 12.178193000 | 1.829758000  | 2.827859000  |
| C  | 13.530675000 | 1.516490000  | 2.978513000  |
| H  | 13.753482000 | 0.825465000  | 3.808589000  |
| C  | 14.525988000 | 2.044311000  | 2.142794000  |
| H  | 15.570456000 | 1.747107000  | 2.314523000  |
| C  | 14.178031000 | 2.939792000  | 1.084375000  |
| C  | 15.117266000 | 3.486942000  | 0.107889000  |
| H  | 14.662917000 | 4.110987000  | -0.663426000 |
| C  | 16.455731000 | 3.282068000  | 0.073828000  |
| H  | 16.897587000 | 2.659133000  | 0.855256000  |
| C  | 17.393326000 | 3.741652000  | -0.943216000 |
| C  | 17.073024000 | 4.688317000  | -1.958763000 |
| H  | 16.102526000 | 5.198702000  | -1.942707000 |
| C  | 17.997719000 | 4.962100000  | -2.975566000 |
| H  | 17.748406000 | 5.684079000  | -3.764720000 |
| C  | 19.262930000 | 4.327263000  | -2.991818000 |
| H  | 19.974993000 | 4.552301000  | -3.797662000 |

|   |              |             |              |
|---|--------------|-------------|--------------|
| C | 19.614681000 | 3.434424000 | -1.959655000 |
| H | 20.604729000 | 2.960020000 | -1.942599000 |
| C | 18.685920000 | 3.153301000 | -0.946509000 |
| H | 18.929717000 | 2.466310000 | -0.133262000 |
| C | 6.064995000  | 4.833920000 | 6.937622000  |
| H | 5.046403000  | 5.234686000 | 6.845533000  |
| C | 7.083615000  | 5.420622000 | 6.189069000  |
| H | 6.899928000  | 6.267183000 | 5.516350000  |
| N | 8.405035000  | 4.977757000 | 6.240362000  |
| C | 8.689828000  | 3.900147000 | 7.087683000  |
| H | 9.737345000  | 3.558269000 | 7.086582000  |
| C | 7.711991000  | 3.303592000 | 7.888152000  |
| H | 7.983355000  | 2.489184000 | 8.573146000  |
| C | 6.365140000  | 3.770153000 | 7.838360000  |
| C | 5.373321000  | 3.191670000 | 8.726380000  |
| H | 5.737663000  | 2.471038000 | 9.457435000  |
| C | 4.059111000  | 3.504108000 | 8.686697000  |
| H | 3.716280000  | 4.212494000 | 7.930469000  |
| C | 3.032195000  | 3.091407000 | 9.616563000  |
| C | 3.197234000  | 2.057949000 | 10.580722000 |
| H | 4.111660000  | 1.447059000 | 10.588554000 |
| C | 2.191100000  | 1.843175000 | 11.526872000 |
| H | 2.333277000  | 1.072838000 | 12.292150000 |
| C | 1.015820000  | 2.633189000 | 11.518595000 |
| H | 0.228761000  | 2.466357000 | 12.262426000 |
| C | 0.835904000  | 3.636620000 | 10.550184000 |
| H | -0.076634000 | 4.239971000 | 10.547707000 |
| C | 1.839907000  | 3.858497000 | 9.600040000  |
| H | 1.759168000  | 4.640202000 | 8.837369000  |
| C | 13.811223000 | 6.625619000 | 3.164514000  |
| H | 14.209475000 | 7.371988000 | 2.464778000  |
| C | 12.472968000 | 6.712600000 | 3.561339000  |
| H | 11.798193000 | 7.509471000 | 3.206806000  |
| N | 11.893771000 | 5.795372000 | 4.439064000  |
| C | 12.721699000 | 4.801404000 | 4.974198000  |
| H | 12.244242000 | 4.098571000 | 5.676417000  |
| C | 14.071398000 | 4.687731000 | 4.625524000  |
| H | 14.680140000 | 3.896100000 | 5.087893000  |
| C | 14.641880000 | 5.580112000 | 3.668468000  |
| C | 16.025189000 | 5.362996000 | 3.268108000  |
| H | 16.532119000 | 4.577332000 | 3.827743000  |
| C | 16.708921000 | 6.018914000 | 2.300469000  |
| H | 16.197351000 | 6.809348000 | 1.747291000  |
| C | 18.121522000 | 5.846083000 | 1.974591000  |
| C | 18.753435000 | 6.829880000 | 1.160080000  |
| H | 18.140793000 | 7.623792000 | 0.707768000  |
| C | 20.149040000 | 6.824569000 | 0.992157000  |
| H | 20.626293000 | 7.606347000 | 0.387522000  |
| C | 20.932998000 | 5.830091000 | 1.615525000  |
| H | 22.026530000 | 5.833982000 | 1.506703000  |
| C | 20.314814000 | 4.820992000 | 2.389782000  |
| H | 20.926570000 | 4.049008000 | 2.876205000  |

|   |              |             |             |
|---|--------------|-------------|-------------|
| C | 18.924308000 | 4.822005000 | 2.562275000 |
| H | 18.451245000 | 4.039068000 | 3.168430000 |

**Scan-TS1**

|    |              |              |              |
|----|--------------|--------------|--------------|
| Ag | 10.651812000 | 1.091969000  | 3.871035000  |
| Ag | 9.906227000  | 5.732658000  | 5.200999000  |
| C  | 6.557427000  | 2.479811000  | 4.139393000  |
| H  | 6.074947000  | 3.400867000  | 3.779552000  |
| C  | 7.923860000  | 2.294837000  | 3.896856000  |
| H  | 8.520975000  | 3.065838000  | 3.382489000  |
| N  | 8.615549000  | 1.145506000  | 4.305893000  |
| C  | 7.862721000  | 0.144287000  | 4.924176000  |
| H  | 8.420931000  | -0.773955000 | 5.171924000  |
| C  | 6.501374000  | 0.293806000  | 5.213743000  |
| H  | 5.971021000  | -0.529708000 | 5.710116000  |
| C  | 5.815714000  | 1.496069000  | 4.863254000  |
| C  | 4.429930000  | 1.782577000  | 5.221157000  |
| H  | 4.012263000  | 2.670495000  | 4.753959000  |
| C  | 3.683804000  | 1.104988000  | 6.129567000  |
| H  | 4.147799000  | 0.244441000  | 6.617404000  |
| C  | 2.296376000  | 1.335322000  | 6.530397000  |
| C  | 1.721487000  | 0.421498000  | 7.464656000  |
| H  | 2.368243000  | -0.323277000 | 7.951933000  |
| C  | 0.336749000  | 0.414046000  | 7.699368000  |
| H  | -0.080743000 | -0.327427000 | 8.390847000  |
| C  | -0.501030000 | 1.333173000  | 7.031631000  |
| H  | -1.590688000 | 1.313532000  | 7.183289000  |
| C  | 0.062165000  | 2.287064000  | 6.150020000  |
| H  | -0.589718000 | 3.003962000  | 5.632111000  |
| C  | 1.442549000  | 2.298439000  | 5.909848000  |
| H  | 1.862829000  | 3.034165000  | 5.215540000  |
| C  | 12.923509000 | 3.293768000  | 0.947618000  |
| H  | 12.615133000 | 4.005289000  | 0.169893000  |
| C  | 11.960272000 | 2.735151000  | 1.789667000  |
| H  | 10.890945000 | 2.985007000  | 1.700970000  |
| N  | 12.283597000 | 1.818895000  | 2.798750000  |
| C  | 13.633947000 | 1.502601000  | 2.960168000  |
| H  | 13.846184000 | 0.808094000  | 3.790120000  |
| C  | 14.638161000 | 2.033175000  | 2.136589000  |
| H  | 15.681392000 | 1.735224000  | 2.313909000  |
| C  | 14.299046000 | 2.937816000  | 1.083816000  |
| C  | 15.238546000 | 3.490544000  | 0.114057000  |
| H  | 14.782097000 | 4.144678000  | -0.630143000 |
| C  | 16.570145000 | 3.256080000  | 0.030296000  |
| H  | 17.031121000 | 2.594608000  | 0.767643000  |
| C  | 17.455932000 | 3.739506000  | -1.021890000 |
| C  | 17.081120000 | 4.755578000  | -1.948914000 |
| H  | 16.134996000 | 5.296178000  | -1.818801000 |
| C  | 17.918158000 | 5.059888000  | -3.029126000 |
| H  | 17.624501000 | 5.836139000  | -3.748302000 |
| C  | 19.151836000 | 4.386951000  | -3.195105000 |
| H  | 19.794640000 | 4.631210000  | -4.050147000 |

|   |              |             |              |
|---|--------------|-------------|--------------|
| C | 19.563699000 | 3.426919000 | -2.250154000 |
| H | 20.534425000 | 2.924735000 | -2.355248000 |
| C | 18.721854000 | 3.111124000 | -1.172618000 |
| H | 19.020816000 | 2.360159000 | -0.436014000 |
| C | 5.923437000  | 5.015519000 | 6.883057000  |
| H | 4.899640000  | 5.370013000 | 6.694180000  |
| C | 6.995422000  | 5.515115000 | 6.136542000  |
| H | 6.857525000  | 6.291996000 | 5.379502000  |
| N | 8.302816000  | 5.085019000 | 6.331933000  |
| C | 8.532977000  | 4.127317000 | 7.326771000  |
| H | 9.576428000  | 3.784230000 | 7.415867000  |
| C | 7.509601000  | 3.671031000 | 8.168819000  |
| H | 7.721600000  | 2.958126000 | 8.979359000  |
| C | 6.181440000  | 4.115999000 | 7.941976000  |
| C | 5.081455000  | 3.842145000 | 8.886428000  |
| H | 4.982564000  | 4.541319000 | 9.716603000  |
| C | 4.116720000  | 2.956789000 | 8.670180000  |
| H | 4.214801000  | 2.283522000 | 7.826108000  |
| C | 2.985533000  | 2.812094000 | 9.598357000  |
| C | 3.065727000  | 1.811297000 | 10.588171000 |
| H | 3.923801000  | 1.124166000 | 10.603575000 |
| C | 2.079577000  | 1.759227000 | 11.577031000 |
| H | 2.205902000  | 1.027616000 | 12.377398000 |
| C | 0.991584000  | 2.657595000 | 11.552571000 |
| H | 0.209527000  | 2.602253000 | 12.318315000 |
| C | 0.900148000  | 3.632078000 | 10.542291000 |
| H | 0.051656000  | 4.324940000 | 10.523140000 |
| C | 1.911551000  | 3.726006000 | 9.571619000  |
| H | 1.894815000  | 4.494079000 | 8.789303000  |
| C | 13.792610000 | 6.562175000 | 3.299356000  |
| H | 14.203197000 | 7.336929000 | 2.638451000  |
| C | 12.451967000 | 6.645709000 | 3.688985000  |
| H | 11.790602000 | 7.466765000 | 3.366423000  |
| N | 11.854113000 | 5.696457000 | 4.520139000  |
| C | 12.669232000 | 4.674116000 | 5.021859000  |
| H | 12.181529000 | 3.946130000 | 5.691037000  |
| C | 14.021993000 | 4.562446000 | 4.678369000  |
| H | 14.619358000 | 3.748582000 | 5.116942000  |
| C | 14.609898000 | 5.485728000 | 3.759796000  |
| C | 15.990901000 | 5.267926000 | 3.345816000  |
| H | 16.491268000 | 4.454502000 | 3.870552000  |
| C | 16.673730000 | 5.952186000 | 2.395333000  |
| H | 16.161729000 | 6.765880000 | 1.877561000  |
| C | 18.080074000 | 5.784003000 | 2.039790000  |
| C | 18.697688000 | 6.777022000 | 1.224136000  |
| H | 18.077422000 | 7.577047000 | 0.793630000  |
| C | 20.090249000 | 6.774909000 | 1.030532000  |
| H | 20.556845000 | 7.564211000 | 0.426936000  |
| C | 20.886806000 | 5.774171000 | 1.627883000  |
| H | 21.978661000 | 5.782200000 | 1.500565000  |
| C | 20.282653000 | 4.754872000 | 2.400157000  |
| H | 20.902356000 | 3.976012000 | 2.865339000  |

|           |              |              |              |
|-----------|--------------|--------------|--------------|
| C         | 18.89544000  | 4.753952000  | 2.598522000  |
| H         | 18.433799000 | 3.965156000  | 3.204316000  |
| <b>PC</b> |              |              |              |
| Ag        | 10.537972000 | 1.096543000  | 3.942367000  |
| Ag        | 10.167164000 | 5.624303000  | 5.420865000  |
| C         | 6.449552000  | 2.477678000  | 4.190091000  |
| H         | 5.972509000  | 3.397267000  | 3.821601000  |
| C         | 7.810637000  | 2.276938000  | 3.936450000  |
| H         | 8.407329000  | 3.032378000  | 3.399238000  |
| N         | 8.499279000  | 1.132009000  | 4.364577000  |
| C         | 7.746569000  | 0.153553000  | 5.019265000  |
| H         | 8.300442000  | -0.762974000 | 5.282380000  |
| C         | 6.391012000  | 0.322474000  | 5.324364000  |
| H         | 5.857618000  | -0.483260000 | 5.846087000  |
| C         | 5.710106000  | 1.519441000  | 4.948738000  |
| C         | 4.324200000  | 1.810803000  | 5.298331000  |
| H         | 3.877741000  | 2.634152000  | 4.749424000  |
| C         | 3.602369000  | 1.207896000  | 6.273242000  |
| H         | 4.090921000  | 0.419318000  | 6.848777000  |
| C         | 2.195891000  | 1.405428000  | 6.606692000  |
| C         | 1.603272000  | 0.458158000  | 7.491013000  |
| H         | 2.245602000  | -0.280831000 | 7.991701000  |
| C         | 0.211668000  | 0.411421000  | 7.662852000  |
| H         | -0.209897000 | -0.364315000 | 8.311209000  |
| C         | -0.619254000 | 1.331519000  | 6.988579000  |
| H         | -1.713050000 | 1.288812000  | 7.099705000  |
| C         | -0.040297000 | 2.316276000  | 6.152306000  |
| H         | -0.686123000 | 3.034670000  | 5.628725000  |
| C         | 1.348403000  | 2.359726000  | 5.965398000  |
| H         | 1.781235000  | 3.125760000  | 5.310708000  |
| C         | 12.817675000 | 3.356765000  | 1.064651000  |
| H         | 12.514422000 | 4.101614000  | 0.316549000  |
| C         | 11.858403000 | 2.821466000  | 1.927767000  |
| H         | 10.800266000 | 3.125566000  | 1.885645000  |
| N         | 12.173495000 | 1.863580000  | 2.899689000  |
| C         | 13.512467000 | 1.483022000  | 3.006814000  |
| H         | 13.720185000 | 0.754325000  | 3.807801000  |
| C         | 14.512421000 | 1.993787000  | 2.165897000  |
| H         | 15.547189000 | 1.648695000  | 2.302786000  |
| C         | 14.180245000 | 2.937546000  | 1.146263000  |
| C         | 15.116802000 | 3.476841000  | 0.164832000  |
| H         | 14.662733000 | 4.146472000  | -0.566902000 |
| C         | 16.445510000 | 3.228807000  | 0.069758000  |
| H         | 16.904068000 | 2.557440000  | 0.800048000  |
| C         | 17.337402000 | 3.726147000  | -0.972391000 |
| C         | 16.967394000 | 4.759652000  | -1.881382000 |
| H         | 16.019772000 | 5.294656000  | -1.743937000 |
| C         | 17.811483000 | 5.092190000  | -2.948096000 |
| H         | 17.513558000 | 5.878640000  | -3.654287000 |
| C         | 19.050237000 | 4.429680000  | -3.118402000 |
| H         | 19.700723000 | 4.697364000  | -3.962036000 |

|   |              |             |              |
|---|--------------|-------------|--------------|
| C | 19.458742000 | 3.453158000 | -2.188094000 |
| H | 20.435372000 | 2.962135000 | -2.292365000 |
| C | 18.608985000 | 3.108678000 | -1.124910000 |
| H | 18.908888000 | 2.348798000 | -0.397245000 |
| C | 6.061263000  | 5.262264000 | 6.568553000  |
| H | 5.132750000  | 5.766913000 | 6.275168000  |
| C | 7.297855000  | 5.741749000 | 6.144591000  |
| H | 7.412721000  | 6.668250000 | 5.571770000  |
| N | 8.485930000  | 5.074833000 | 6.428268000  |
| C | 8.414142000  | 3.905285000 | 7.197883000  |
| H | 9.373397000  | 3.388298000 | 7.362735000  |
| C | 7.212559000  | 3.446709000 | 7.733929000  |
| H | 7.213133000  | 2.563430000 | 8.385983000  |
| C | 5.998596000  | 4.142108000 | 7.433855000  |
| C | 4.719310000  | 3.853691000 | 8.035728000  |
| H | 3.892705000  | 4.471665000 | 7.687638000  |
| C | 4.514023000  | 2.958037000 | 9.020568000  |
| H | 5.344444000  | 2.330705000 | 9.350383000  |
| C | 3.288542000  | 2.775733000 | 9.758624000  |
| C | 3.321540000  | 1.819938000 | 10.802807000 |
| H | 4.226713000  | 1.211439000 | 10.948207000 |
| C | 2.228064000  | 1.693683000 | 11.660271000 |
| H | 2.311240000  | 0.977094000 | 12.479765000 |
| C | 1.082083000  | 2.495018000 | 11.474428000 |
| H | 0.228150000  | 2.409667000 | 12.157004000 |
| C | 1.020402000  | 3.414304000 | 10.402226000 |
| H | 0.114941000  | 4.014530000 | 10.247588000 |
| C | 2.117664000  | 3.561851000 | 9.548055000  |
| H | 2.086875000  | 4.287609000 | 8.724469000  |
| C | 13.888273000 | 6.535974000 | 3.286952000  |
| H | 14.243911000 | 7.296008000 | 2.578648000  |
| C | 12.569881000 | 6.602169000 | 3.748868000  |
| H | 11.865437000 | 7.392348000 | 3.440175000  |
| N | 12.050047000 | 5.666678000 | 4.643907000  |
| C | 12.909086000 | 4.673365000 | 5.126647000  |
| H | 12.471211000 | 3.957534000 | 5.841501000  |
| C | 14.238144000 | 4.579199000 | 4.706737000  |
| H | 14.876291000 | 3.788338000 | 5.125890000  |
| C | 14.752057000 | 5.491793000 | 3.736634000  |
| C | 16.117542000 | 5.288724000 | 3.277714000  |
| H | 16.635660000 | 4.476073000 | 3.784930000  |
| C | 16.784171000 | 5.985303000 | 2.327023000  |
| H | 16.268723000 | 6.804280000 | 1.820530000  |
| C | 18.191691000 | 5.819095000 | 1.977508000  |
| C | 18.814682000 | 6.819275000 | 1.176561000  |
| H | 18.196916000 | 7.620726000 | 0.744965000  |
| C | 20.208741000 | 6.820245000 | 0.998011000  |
| H | 20.678933000 | 7.614982000 | 0.405036000  |
| C | 20.999976000 | 5.816267000 | 1.596786000  |
| H | 22.092718000 | 5.824659000 | 1.481537000  |
| C | 20.390307000 | 4.791312000 | 2.356368000  |
| H | 21.007240000 | 4.011975000 | 2.824049000  |



|   |              |             |             |
|---|--------------|-------------|-------------|
| C | 19.001793000 | 4.786581000 | 2.540271000 |
| H | 18.537231000 | 3.993010000 | 3.138823000 |

**Scan-TS2**

|    |              |              |              |
|----|--------------|--------------|--------------|
| Ag | 10.589791000 | 1.208008000  | 3.904713000  |
| Ag | 10.168813000 | 5.533558000  | 5.557115000  |
| C  | 6.492722000  | 2.588955000  | 4.241279000  |
| H  | 6.012165000  | 3.521836000  | 3.912792000  |
| C  | 7.858227000  | 2.412691000  | 3.987439000  |
| H  | 8.450532000  | 3.200124000  | 3.492463000  |
| N  | 8.554267000  | 1.253424000  | 4.364158000  |
| C  | 7.801481000  | 0.237492000  | 4.961187000  |
| H  | 8.358250000  | -0.688533000 | 5.180619000  |
| C  | 6.441465000  | 0.380555000  | 5.264729000  |
| H  | 5.912045000  | -0.455149000 | 5.742252000  |
| C  | 5.752134000  | 1.590329000  | 4.947196000  |
| C  | 4.363257000  | 1.863722000  | 5.306985000  |
| H  | 3.928233000  | 2.728612000  | 4.814199000  |
| C  | 3.628375000  | 1.210252000  | 6.240649000  |
| H  | 4.105982000  | 0.383335000  | 6.770479000  |
| C  | 2.224574000  | 1.410052000  | 6.591459000  |
| C  | 1.631001000  | 0.458571000  | 7.472437000  |
| H  | 2.270895000  | -0.293837000 | 7.955784000  |
| C  | 0.241506000  | 0.427913000  | 7.666457000  |
| H  | -0.182130000 | -0.345695000 | 8.316480000  |
| C  | -0.588422000 | 1.362271000  | 7.011525000  |
| H  | -1.680791000 | 1.331577000  | 7.138555000  |
| C  | -0.009860000 | 2.347940000  | 6.176662000  |
| H  | -0.654124000 | 3.078934000  | 5.668638000  |
| C  | 1.377300000  | 2.381575000  | 5.974631000  |
| H  | 1.808031000  | 3.153126000  | 5.324916000  |
| C  | 12.870732000 | 3.087355000  | 0.739440000  |
| H  | 12.563686000 | 3.637643000  | -0.160229000 |
| C  | 11.899011000 | 2.614613000  | 1.632946000  |
| H  | 10.821818000 | 2.774488000  | 1.463462000  |
| N  | 12.225250000 | 1.879512000  | 2.778197000  |
| C  | 13.578108000 | 1.671444000  | 3.037330000  |
| H  | 13.793586000 | 1.090772000  | 3.950018000  |
| C  | 14.591936000 | 2.157538000  | 2.186350000  |
| H  | 15.645353000 | 1.944131000  | 2.423225000  |
| C  | 14.251128000 | 2.881208000  | 1.008981000  |
| C  | 15.277091000 | 3.155440000  | -0.041530000 |
| H  | 15.508137000 | 2.302306000  | -0.681464000 |
| C  | 16.074745000 | 4.220555000  | -0.186403000 |
| H  | 15.876016000 | 5.125844000  | 0.386499000  |
| C  | 17.181242000 | 4.224115000  | -1.172179000 |
| C  | 17.185972000 | 5.139944000  | -2.253481000 |
| H  | 16.391163000 | 5.892522000  | -2.327234000 |
| C  | 18.179746000 | 5.043515000  | -3.242402000 |
| H  | 18.165490000 | 5.720421000  | -4.108212000 |
| C  | 19.236978000 | 4.119881000  | -3.103339000 |
| H  | 20.049166000 | 4.118583000  | -3.843101000 |

|   |              |             |              |
|---|--------------|-------------|--------------|
| C | 19.261558000 | 3.237566000 | -2.004562000 |
| H | 20.096419000 | 2.535625000 | -1.878009000 |
| C | 18.219258000 | 3.266264000 | -1.059562000 |
| H | 18.216406000 | 2.583745000 | -0.199956000 |
| C | 6.037819000  | 5.243567000 | 6.618923000  |
| H | 5.116146000  | 5.753113000 | 6.312463000  |
| C | 7.283054000  | 5.701642000 | 6.195373000  |
| H | 7.416221000  | 6.614501000 | 5.602478000  |
| N | 8.458008000  | 5.024047000 | 6.508615000  |
| C | 8.366705000  | 3.863422000 | 7.289384000  |
| H | 9.318441000  | 3.338855000 | 7.470280000  |
| C | 7.155827000  | 3.421550000 | 7.812426000  |
| H | 7.138893000  | 2.544257000 | 8.471895000  |
| C | 5.955396000  | 4.131768000 | 7.494131000  |
| C | 4.672972000  | 3.854595000 | 8.089508000  |
| H | 3.859684000  | 4.509555000 | 7.779713000  |
| C | 4.453321000  | 2.908129000 | 9.021764000  |
| H | 5.270098000  | 2.244590000 | 9.310949000  |
| C | 3.236253000  | 2.723387000 | 9.765932000  |
| C | 3.285131000  | 1.768582000 | 10.809122000 |
| H | 4.188624000  | 1.153924000 | 10.937613000 |
| C | 2.211125000  | 1.657056000 | 11.690350000 |
| H | 2.313641000  | 0.943873000 | 12.510292000 |
| C | 1.066893000  | 2.465543000 | 11.522028000 |
| H | 0.222286000  | 2.394431000 | 12.216250000 |
| C | 0.987678000  | 3.379821000 | 10.447764000 |
| H | 0.081617000  | 3.982929000 | 10.309921000 |
| C | 2.068488000  | 3.517482000 | 9.573235000  |
| H | 2.028060000  | 4.238838000 | 8.746524000  |
| C | 13.874086000 | 6.468266000 | 3.439292000  |
| H | 14.223370000 | 7.238553000 | 2.738628000  |
| C | 12.560156000 | 6.530942000 | 3.913889000  |
| H | 11.854844000 | 7.328074000 | 3.626285000  |
| N | 12.048204000 | 5.581552000 | 4.797514000  |
| C | 12.906192000 | 4.578907000 | 5.257833000  |
| H | 12.474053000 | 3.858342000 | 5.970029000  |
| C | 14.228293000 | 4.483677000 | 4.819277000  |
| H | 14.867021000 | 3.685480000 | 5.219380000  |
| C | 14.736579000 | 5.410156000 | 3.859493000  |
| C | 16.088499000 | 5.197729000 | 3.365859000  |
| H | 16.580045000 | 4.319413000 | 3.780804000  |
| C | 16.770738000 | 5.964573000 | 2.480851000  |
| H | 16.278974000 | 6.854742000 | 2.080901000  |
| C | 18.158013000 | 5.782930000 | 2.064783000  |
| C | 18.764337000 | 6.786884000 | 1.254157000  |
| H | 18.142462000 | 7.605293000 | 0.861507000  |
| C | 20.150375000 | 6.770789000 | 1.021699000  |
| H | 20.610302000 | 7.567700000 | 0.423422000  |
| C | 20.949098000 | 5.746795000 | 1.575633000  |
| H | 22.037632000 | 5.744751000 | 1.423187000  |
| C | 20.353020000 | 4.714847000 | 2.337748000  |
| H | 20.973683000 | 3.916418000 | 2.766753000  |

|           |              |              |              |
|-----------|--------------|--------------|--------------|
| C         | 18.973169000 | 4.727365000  | 2.574546000  |
| H         | 18.519710000 | 3.932529000  | 3.178665000  |
| <b>PP</b> |              |              |              |
| Ag        | 10.378336000 | 1.558740000  | 3.638258000  |
| Ag        | 10.182006000 | 5.511816000  | 5.538647000  |
| C         | 6.308235000  | 2.712560000  | 4.267423000  |
| H         | 5.781705000  | 3.639286000  | 4.014802000  |
| C         | 7.654042000  | 2.596093000  | 3.914430000  |
| H         | 8.183753000  | 3.411383000  | 3.396497000  |
| N         | 8.410089000  | 1.455621000  | 4.217476000  |
| C         | 7.744890000  | 0.399945000  | 4.848484000  |
| H         | 8.357017000  | -0.501469000 | 5.018678000  |
| C         | 6.398444000  | 0.479406000  | 5.230954000  |
| H         | 5.931467000  | -0.386677000 | 5.719589000  |
| C         | 5.645405000  | 1.666442000  | 4.977115000  |
| C         | 4.263464000  | 1.889378000  | 5.385864000  |
| H         | 3.799449000  | 2.763401000  | 4.937624000  |
| C         | 3.551720000  | 1.191365000  | 6.302282000  |
| H         | 4.040072000  | 0.349881000  | 6.798377000  |
| C         | 2.146141000  | 1.369334000  | 6.654510000  |
| C         | 1.556139000  | 0.380180000  | 7.493709000  |
| H         | 2.199765000  | -0.382074000 | 7.956446000  |
| C         | 0.164982000  | 0.320793000  | 7.662866000  |
| H         | -0.252651000 | -0.490435000 | 8.268891000  |
| C         | -0.669039000 | 1.270557000  | 7.034884000  |
| H         | -1.762985000 | 1.220574000  | 7.140908000  |
| C         | -0.093046000 | 2.296398000  | 6.248279000  |
| H         | -0.742222000 | 3.036939000  | 5.761076000  |
| C         | 1.295345000  | 2.352974000  | 6.061378000  |
| H         | 1.722856000  | 3.150034000  | 5.439024000  |
| C         | 13.272482000 | 3.423659000  | 0.998034000  |
| H         | 13.198281000 | 4.212754000  | 0.238528000  |
| C         | 12.129569000 | 3.068102000  | 1.717897000  |
| H         | 11.157218000 | 3.561403000  | 1.555264000  |
| N         | 12.131015000 | 2.059129000  | 2.693775000  |
| C         | 13.344951000 | 1.425566000  | 2.959245000  |
| H         | 13.312017000 | 0.650461000  | 3.741268000  |
| C         | 14.518604000 | 1.761266000  | 2.271556000  |
| H         | 15.458259000 | 1.249875000  | 2.522651000  |
| C         | 14.511573000 | 2.754000000  | 1.249400000  |
| C         | 15.745303000 | 2.977470000  | 0.503891000  |
| H         | 16.559514000 | 2.314188000  | 0.795777000  |
| C         | 15.968559000 | 3.889873000  | -0.473537000 |
| H         | 15.164275000 | 4.579395000  | -0.740319000 |
| C         | 17.176597000 | 4.026255000  | -1.280389000 |
| C         | 17.175679000 | 4.975522000  | -2.340370000 |
| H         | 16.334743000 | 5.671747000  | -2.432951000 |
| C         | 18.225529000 | 5.008931000  | -3.270642000 |
| H         | 18.192581000 | 5.709620000  | -4.116537000 |
| C         | 19.349838000 | 4.176877000  | -3.097482000 |
| H         | 20.187367000 | 4.245424000  | -3.805953000 |

|   |              |             |              |
|---|--------------|-------------|--------------|
| C | 19.405741000 | 3.288305000 | -1.997958000 |
| H | 20.296442000 | 2.665230000 | -1.842082000 |
| C | 18.324341000 | 3.196168000 | -1.111613000 |
| H | 18.357623000 | 2.489457000 | -0.273513000 |
| C | 6.066460000  | 5.243642000 | 6.661982000  |
| H | 5.143130000  | 5.760818000 | 6.376645000  |
| C | 7.306295000  | 5.693833000 | 6.216828000  |
| H | 7.435136000  | 6.609257000 | 5.626586000  |
| N | 8.479779000  | 5.001472000 | 6.502537000  |
| C | 8.393010000  | 3.834529000 | 7.274864000  |
| H | 9.343022000  | 3.298363000 | 7.431565000  |
| C | 7.187720000  | 3.399339000 | 7.817674000  |
| H | 7.173620000  | 2.515482000 | 8.468611000  |
| C | 5.989331000  | 4.124979000 | 7.528513000  |
| C | 4.712359000  | 3.851994000 | 8.136390000  |
| H | 3.903719000  | 4.522744000 | 7.848335000  |
| C | 4.487057000  | 2.884894000 | 9.045676000  |
| H | 5.297621000  | 2.206656000 | 9.318032000  |
| C | 3.266937000  | 2.695989000 | 9.783892000  |
| C | 3.312128000  | 1.739522000 | 10.825917000 |
| H | 4.215545000  | 1.125469000 | 10.957966000 |
| C | 2.234564000  | 1.627859000 | 11.703155000 |
| H | 2.334842000  | 0.917057000 | 12.526167000 |
| C | 1.089165000  | 2.433345000 | 11.527423000 |
| H | 0.239626000  | 2.361722000 | 12.215080000 |
| C | 1.013159000  | 3.347597000 | 10.453203000 |
| H | 0.105424000  | 3.947463000 | 10.310985000 |
| C | 2.098946000  | 3.488810000 | 9.585813000  |
| H | 2.060273000  | 4.210094000 | 8.759186000  |
| C | 13.873793000 | 6.501353000 | 3.427945000  |
| H | 14.231245000 | 7.303530000 | 2.768972000  |
| C | 12.564952000 | 6.556848000 | 3.916085000  |
| H | 11.866138000 | 7.375348000 | 3.676694000  |
| N | 12.050551000 | 5.573161000 | 4.759906000  |
| C | 12.898432000 | 4.536430000 | 5.162018000  |
| H | 12.462370000 | 3.788897000 | 5.843285000  |
| C | 14.214949000 | 4.444931000 | 4.704747000  |
| H | 14.845015000 | 3.616160000 | 5.055025000  |
| C | 14.726149000 | 5.413695000 | 3.788992000  |
| C | 16.078170000 | 5.221543000 | 3.290404000  |
| H | 16.590042000 | 4.362742000 | 3.721982000  |
| C | 16.736199000 | 5.977994000 | 2.380010000  |
| H | 16.221501000 | 6.838539000 | 1.946883000  |
| C | 18.132043000 | 5.819037000 | 1.987928000  |
| C | 18.742877000 | 6.843314000 | 1.208667000  |
| H | 18.120480000 | 7.664568000 | 0.823122000  |
| C | 20.133043000 | 6.842668000 | 0.999480000  |
| H | 20.596897000 | 7.655751000 | 0.426584000  |
| C | 20.929659000 | 5.812394000 | 1.543696000  |
| H | 22.020018000 | 5.819576000 | 1.408587000  |
| C | 20.329343000 | 4.761396000 | 2.274979000  |
| H | 20.949503000 | 3.958073000 | 2.695199000  |

|   |              |             |             |
|---|--------------|-------------|-------------|
| C | 18.946317000 | 4.760090000 | 2.491662000 |
| H | 18.488913000 | 3.948740000 | 3.071359000 |

### Coordinates for Fig. 3

#### S<sub>0</sub>-Min (Reactant 1)

|    |              |              |              |
|----|--------------|--------------|--------------|
| Ag | 10.465708954 | 1.433454086  | 3.800538831  |
| Ag | 10.177832086 | 5.581771359  | 5.519742261  |
| C  | 6.341319415  | 2.662291819  | 4.289629829  |
| H  | 5.829279994  | 3.570754258  | 4.010721071  |
| C  | 7.675439449  | 2.522378736  | 3.973546237  |
| H  | 8.206458552  | 3.315511470  | 3.457359120  |
| N  | 8.394523119  | 1.406427882  | 4.307814487  |
| C  | 7.724270496  | 0.390089825  | 4.923781901  |
| H  | 8.309721565  | -0.502000314 | 5.129655902  |
| C  | 6.388403860  | 0.478364898  | 5.268495883  |
| H  | 5.912238582  | -0.362678682 | 5.752696722  |
| C  | 5.675849867  | 1.645600356  | 4.981944688  |
| C  | 4.270668086  | 1.881565376  | 5.365102804  |
| H  | 3.826340456  | 2.738800234  | 4.892634861  |
| C  | 3.552064691  | 1.197025100  | 6.270161744  |
| H  | 4.020873855  | 0.360696135  | 6.768914106  |
| C  | 2.128213643  | 1.384465624  | 6.607263738  |
| C  | 1.540643362  | 0.429242819  | 7.433418276  |
| H  | 2.162122961  | -0.331414038 | 7.889049042  |
| C  | 0.170159500  | 0.404804715  | 7.620433273  |
| H  | -0.254121626 | -0.376888308 | 8.231811434  |
| C  | -0.634593283 | 1.349589885  | 7.003730001  |
| H  | -1.711852342 | 1.324711469  | 7.123987330  |
| C  | -0.053510049 | 2.335348001  | 6.210273749  |
| H  | -0.679700728 | 3.073377678  | 5.725075628  |
| C  | 1.313104569  | 2.358551577  | 6.017221581  |
| H  | 1.745714082  | 3.124986075  | 5.389412783  |
| C  | 13.283282313 | 3.362468002  | 1.054174881  |
| H  | 13.181547246 | 4.129605063  | 0.299931680  |
| C  | 12.180060622 | 2.991649194  | 1.787704429  |
| H  | 11.211606830 | 3.458292271  | 1.630478518  |
| N  | 12.222457774 | 2.017322391  | 2.752994244  |
| C  | 13.422386713 | 1.427321726  | 2.999293191  |
| H  | 13.428402929 | 0.671599379  | 3.779136485  |
| C  | 14.566153858 | 1.766140091  | 2.295850142  |
| H  | 15.501922171 | 1.277453967  | 2.529589818  |
| C  | 14.514724392 | 2.728819983  | 1.290967566  |
| C  | 15.745895585 | 2.972076610  | 0.511246888  |
| H  | 16.558885039 | 2.317112368  | 0.781636284  |
| C  | 15.938690626 | 3.890881061  | -0.452391566 |
| H  | 15.133338946 | 4.570381205  | -0.694160930 |
| C  | 17.141101300 | 4.052691521  | -1.293725765 |
| C  | 17.103258406 | 5.007378910  | -2.305576214 |
| H  | 16.264524902 | 5.684247327  | -2.361362625 |
| C  | 18.121064539 | 5.086122405  | -3.239899148 |
| H  | 18.061031285 | 5.803988814  | -4.048344774 |
| C  | 19.233148467 | 4.270183269  | -3.122593903 |

|   |              |             |              |
|---|--------------|-------------|--------------|
| H | 20.040775609 | 4.358305511 | -3.839281554 |
| C | 19.316839330 | 3.363121552 | -2.070212525 |
| H | 20.198621986 | 2.745954107 | -1.959092409 |
| C | 18.274750048 | 3.242566228 | -1.173413518 |
| H | 18.336242878 | 2.523279538 | -0.369364360 |
| C | 6.060361962  | 5.220758898 | 6.671567294  |
| H | 5.153182408  | 5.732104901 | 6.388744015  |
| C | 7.287026417  | 5.662007754 | 6.222385293  |
| H | 7.395038320  | 6.557868270 | 5.625667618  |
| N | 8.436772419  | 5.004886199 | 6.518727040  |
| C | 8.364319428  | 3.877417956 | 7.295141297  |
| H | 9.305983305  | 3.370930023 | 7.484974534  |
| C | 7.179393617  | 3.428865936 | 7.824173975  |
| H | 7.179710647  | 2.565069026 | 8.472535276  |
| C | 5.994300639  | 4.124618758 | 7.521789236  |
| C | 4.699482890  | 3.839498781 | 8.129965134  |
| H | 3.903489059  | 4.506191427 | 7.840561325  |
| C | 4.462695217  | 2.876088170 | 9.040806764  |
| H | 5.268136995  | 2.209400979 | 9.311666351  |
| C | 3.236235548  | 2.685353729 | 9.780302018  |
| C | 3.271209835  | 1.749035516 | 10.809297868 |
| H | 4.163943184  | 1.149100676 | 10.942366631 |
| C | 2.203781212  | 1.629505954 | 11.669180629 |
| H | 2.283080704  | 0.934234471 | 12.488200005 |
| C | 1.074016102  | 2.411596087 | 11.485883420 |
| H | 0.230860317  | 2.330080894 | 12.157576833 |
| C | 1.007436761  | 3.312957713 | 10.430765634 |
| H | 0.111310746  | 3.901381150 | 10.287720081 |
| C | 2.083449724  | 3.458380453 | 9.586367182  |
| H | 2.046754896  | 4.175504797 | 8.777254269  |
| C | 13.919901964 | 6.480506049 | 3.431429842  |
| H | 14.271624809 | 7.258366654 | 2.769301339  |
| C | 12.629680464 | 6.541653909 | 3.914235590  |
| H | 11.949825814 | 7.348447491 | 3.654231747  |
| N | 12.121883722 | 5.593256199 | 4.750196152  |
| C | 12.943906973 | 4.582089484 | 5.158819225  |
| H | 12.519495600 | 3.854319544 | 5.844107911  |
| C | 14.246452799 | 4.478075817 | 4.715948404  |
| H | 14.866362938 | 3.668775331 | 5.076034969  |
| C | 14.747277366 | 5.417586656 | 3.808709937  |
| C | 16.117916399 | 5.217020250 | 3.308926129  |
| H | 16.615919287 | 4.366910605 | 3.745435096  |
| C | 16.768459074 | 5.961208169 | 2.397767897  |
| H | 16.263820091 | 6.814984700 | 1.968314043  |
| C | 18.175851159 | 5.795634376 | 1.988028721  |
| C | 18.766341742 | 6.804423434 | 1.229302838  |
| H | 18.155780048 | 7.624945144 | 0.871651578  |
| C | 20.131434414 | 6.791269516 | 0.987442450  |
| H | 20.583845560 | 7.595575489 | 0.423279430  |
| C | 20.913491606 | 5.762586886 | 1.488536882  |
| H | 21.984636530 | 5.758753526 | 1.329321396  |
| C | 20.326176352 | 4.727773685 | 2.209340463  |

|   |              |             |             |
|---|--------------|-------------|-------------|
| H | 20.936507377 | 3.923051884 | 2.598460528 |
| C | 18.969540619 | 4.742610603 | 2.456216186 |
| H | 18.525128252 | 3.944432841 | 3.033043512 |

**CI(SALPP/SALPE)**

|    |              |              |              |
|----|--------------|--------------|--------------|
| Ag | 10.412527964 | 1.468352453  | 3.728830043  |
| Ag | 10.122904863 | 5.627447664  | 5.449873560  |
| C  | 6.284737190  | 2.694783091  | 4.236816030  |
| H  | 5.769042954  | 3.604038094  | 3.967767875  |
| C  | 7.617215981  | 2.558501179  | 3.908076618  |
| H  | 8.144848456  | 3.355669625  | 3.393269013  |
| N  | 8.339760418  | 1.440881798  | 4.230509406  |
| C  | 7.674585886  | 0.420125317  | 4.844459475  |
| H  | 8.262820745  | -0.472059815 | 5.041414283  |
| C  | 6.342372001  | 0.504616159  | 5.201789958  |
| H  | 5.872067626  | -0.339362576 | 5.686492150  |
| C  | 5.626016398  | 1.672974632  | 4.930518285  |
| C  | 4.225573924  | 1.900238538  | 5.338468466  |
| H  | 3.767551160  | 2.758643307  | 4.881087478  |
| C  | 3.530777594  | 1.202276099  | 6.255662552  |
| H  | 4.017831620  | 0.364546026  | 6.733644336  |
| C  | 2.114762502  | 1.376615496  | 6.633275605  |
| C  | 1.557186575  | 0.412940064  | 7.471785849  |
| H  | 2.196073534  | -0.347724857 | 7.902909464  |
| C  | 0.192914434  | 0.378654416  | 7.699957077  |
| H  | -0.208474912 | -0.409547646 | 8.318667518  |
| C  | -0.635833844 | 1.322167830  | 7.113892057  |
| H  | -1.708799191 | 1.289782897  | 7.266893445  |
| C  | -0.084713716 | 2.315973436  | 6.308723578  |
| H  | -0.729811220 | 3.053084492  | 5.847380555  |
| C  | 1.275271544  | 2.348812990  | 6.073872863  |
| H  | 1.683704722  | 3.122044522  | 5.438328764  |
| C  | 13.270441668 | 3.383519023  | 1.005083383  |
| H  | 13.182203478 | 4.148856055  | 0.247304055  |
| C  | 12.155296185 | 3.020139795  | 1.725611591  |
| H  | 11.191168681 | 3.491013607  | 1.554839526  |
| N  | 12.180662720 | 2.048216082  | 2.694127710  |
| C  | 13.374605447 | 1.453679632  | 2.956859023  |
| H  | 13.367116901 | 0.699993654  | 3.738647509  |
| C  | 14.529234220 | 1.785665165  | 2.268569182  |
| H  | 15.459510255 | 1.293526858  | 2.516564242  |
| C  | 14.496355803 | 2.745781887  | 1.260971604  |
| C  | 15.743110419 | 2.979276596  | 0.502194533  |
| H  | 16.546038520 | 2.319637374  | 0.790692597  |
| C  | 15.965262150 | 3.893010592  | -0.460554681 |
| H  | 15.173034648 | 4.579837517  | -0.723760005 |
| C  | 17.190345900 | 4.035844597  | -1.272676803 |
| C  | 17.193292359 | 4.987650033  | -2.287607170 |
| H  | 16.368236393 | 5.678188301  | -2.365795421 |
| C  | 18.235306287 | 5.047080253  | -3.196309024 |
| H  | 18.206865285 | 5.763020758  | -4.008185343 |

|   |              |             |              |
|---|--------------|-------------|--------------|
| C | 19.331218664 | 4.214421444 | -3.048457779 |
| H | 20.157941961 | 4.287231376 | -3.744686818 |
| C | 19.374771116 | 3.311147811 | -1.990576614 |
| H | 20.244258285 | 2.681726526 | -1.854318277 |
| C | 18.308585535 | 3.210227354 | -1.120098614 |
| H | 18.339654061 | 2.495162933 | -0.310516442 |
| C | 6.019090529  | 5.244046190 | 6.631137888  |
| H | 5.106342924  | 5.752501985 | 6.361535944  |
| C | 7.234178173  | 5.691351849 | 6.172242786  |
| H | 7.330131026  | 6.590133371 | 5.579285602  |
| N | 8.396116101  | 5.037572663 | 6.455138085  |
| C | 8.338643430  | 3.901968007 | 7.226610780  |
| H | 9.285154571  | 3.400101755 | 7.402345200  |
| C | 7.167077757  | 3.441507610 | 7.764317255  |
| H | 7.179710859  | 2.572850863 | 8.406087600  |
| C | 5.969814231  | 4.137704793 | 7.481717553  |
| C | 4.707691138  | 3.836810307 | 8.107214428  |
| H | 3.898202938  | 4.499773926 | 7.842850069  |
| C | 4.508820121  | 2.851779058 | 9.019180295  |
| H | 5.322865252  | 2.188917015 | 9.263195196  |
| C | 3.312864504  | 2.656807929 | 9.784184803  |
| C | 3.376096121  | 1.705484234 | 10.813130699 |
| H | 4.270510502  | 1.102507746 | 10.918820255 |
| C | 2.336980471  | 1.587677149 | 11.697313702 |
| H | 2.441128067  | 0.887641383 | 12.509315447 |
| C | 1.198530207  | 2.379037997 | 11.549212760 |
| H | 0.375810284  | 2.295371771 | 12.246550103 |
| C | 1.098065107  | 3.288362444 | 10.497437946 |
| H | 0.198266178  | 3.877812251 | 10.383898046 |
| C | 2.145236068  | 3.437712425 | 9.622289692  |
| H | 2.084929209  | 4.157408380 | 8.817022733  |
| C | 13.882838019 | 6.504736758 | 3.382803268  |
| H | 14.245535471 | 7.279598039 | 2.723151129  |
| C | 12.586686135 | 6.571643072 | 3.849936247  |
| H | 11.912818332 | 7.380686980 | 3.581472875  |
| N | 12.067394235 | 5.628107707 | 4.684216290  |
| C | 12.880667328 | 4.615188373 | 5.104193745  |
| H | 12.446067759 | 3.891349896 | 5.787129651  |
| C | 14.187169866 | 4.505060533 | 4.677306945  |
| H | 14.799808686 | 3.694773275 | 5.047331406  |
| C | 14.702090921 | 5.440674342 | 3.774696053  |
| C | 16.079434946 | 5.232204468 | 3.297974446  |
| H | 16.565615062 | 4.381357853 | 3.746071077  |
| C | 16.751023848 | 5.969303999 | 2.396192447  |
| H | 16.260835690 | 6.824750561 | 1.953798123  |
| C | 18.165522995 | 5.791380214 | 2.017925166  |
| C | 18.780619526 | 6.792212775 | 1.268590158  |
| H | 18.184979678 | 7.616400254 | 0.894564731  |
| C | 20.150461882 | 6.766511800 | 1.056767887  |
| H | 20.621858161 | 7.564815474 | 0.499676284  |
| C | 20.912449392 | 5.732955765 | 1.578420198  |
| H | 21.986670423 | 5.719215148 | 1.442463789  |



|   |              |             |             |
|---|--------------|-------------|-------------|
| C | 20.300683343 | 4.705937884 | 2.289999797 |
| H | 20.895291190 | 3.897396218 | 2.695144360 |
| C | 18.939411860 | 4.733769776 | 2.507836892 |
| H | 18.475527410 | 3.941752622 | 3.077798059 |

**STC(S<sub>ALPE</sub>/T<sub>BLPP</sub>)**

|    |              |              |              |
|----|--------------|--------------|--------------|
| Ag | 10.462153995 | 1.437709433  | 3.795970799  |
| Ag | 10.176305039 | 5.541658454  | 5.551502103  |
| C  | 6.333089597  | 2.653032561  | 4.268553991  |
| H  | 5.823584671  | 3.562293592  | 3.986869613  |
| C  | 7.670653040  | 2.514782021  | 3.959681226  |
| H  | 8.206247040  | 3.309083501  | 3.448782220  |
| N  | 8.388570510  | 1.400600111  | 4.296922331  |
| C  | 7.718552948  | 0.382416649  | 4.907987622  |
| H  | 8.306222222  | -0.507602973 | 5.116632739  |
| C  | 6.379894161  | 0.466951990  | 5.246019518  |
| H  | 5.904591812  | -0.376068745 | 5.727930486  |
| C  | 5.666055431  | 1.633458511  | 4.957220484  |
| C  | 4.259194909  | 1.868138567  | 5.342101215  |
| H  | 3.813074792  | 2.723355752  | 4.864720925  |
| C  | 3.541449274  | 1.185477484  | 6.249751695  |
| H  | 4.013921159  | 0.347469794  | 6.743959271  |
| C  | 2.119320793  | 1.374648084  | 6.598545702  |
| C  | 1.537045390  | 0.430318133  | 7.443513496  |
| H  | 2.159493993  | -0.330872790 | 7.898026905  |
| C  | 0.168282906  | 0.412810188  | 7.645908183  |
| H  | -0.253044062 | -0.361294322 | 8.269469222  |
| C  | -0.641150186 | 1.352572762  | 7.026874256  |
| H  | -1.717479105 | 1.331460405  | 7.158140006  |
| C  | -0.066292738 | 2.327608546  | 6.215232087  |
| H  | -0.696368457 | 3.061208225  | 5.727557998  |
| C  | 1.298171267  | 2.345205499  | 6.007197588  |
| H  | 1.724767268  | 3.103673631  | 5.365376759  |
| C  | 13.277991546 | 3.379413904  | 1.064649305  |
| H  | 13.174760230 | 4.151860485  | 0.316160699  |
| C  | 12.176875187 | 3.004187546  | 1.798771325  |
| H  | 11.208553530 | 3.472715849  | 1.646990060  |
| N  | 12.220673600 | 2.023688563  | 2.757806095  |
| C  | 13.420414945 | 1.431059818  | 2.998495763  |
| H  | 13.427095491 | 0.670704752  | 3.773999883  |
| C  | 14.562320022 | 1.774017720  | 2.294145964  |
| H  | 15.498635081 | 1.283773830  | 2.522284468  |
| C  | 14.509391978 | 2.742617968  | 1.294613650  |
| C  | 15.738799900 | 2.985465519  | 0.513928165  |
| H  | 16.550058045 | 2.327690939  | 0.782437427  |
| C  | 15.935827248 | 3.901660455  | -0.445876770 |
| H  | 15.134490171 | 4.585806822  | -0.688175406 |
| C  | 17.139047987 | 4.054996982  | -1.285629760 |
| C  | 17.111088907 | 5.007572022  | -2.299561326 |
| H  | 16.278775646 | 5.690782931  | -2.356314051 |
| C  | 18.129667691 | 5.075230704  | -3.233734312 |

|   |              |             |              |
|---|--------------|-------------|--------------|
| H | 18.076560097 | 5.791947016 | -4.043509597 |
| C | 19.234219627 | 4.249345867 | -3.114752861 |
| H | 20.042537399 | 4.328258753 | -3.831860536 |
| C | 19.309746874 | 3.344644106 | -2.059613581 |
| H | 20.186050375 | 2.720071540 | -1.946597439 |
| C | 18.266248286 | 3.236252265 | -1.162715274 |
| H | 18.319684552 | 2.520128335 | -0.355371516 |
| C | 6.036917399  | 5.222325903 | 6.638677923  |
| H | 5.133650391  | 5.738991402 | 6.344076640  |
| C | 7.273787355  | 5.655624871 | 6.206360536  |
| H | 7.398232751  | 6.552149134 | 5.612669384  |
| N | 8.413388288  | 4.982032288 | 6.520135922  |
| C | 8.336812530  | 3.855081019 | 7.292549546  |
| H | 9.275464806  | 3.351054501 | 7.489463015  |
| C | 7.148566608  | 3.409249309 | 7.812674742  |
| H | 7.145496692  | 2.544539472 | 8.462276910  |
| C | 5.967927503  | 4.118003524 | 7.494516605  |
| C | 4.694629790  | 3.836839015 | 8.091323288  |
| H | 3.892730705  | 4.503266316 | 7.806383671  |
| C | 4.472264160  | 2.850242402 | 9.021886561  |
| H | 5.279951893  | 2.181638727 | 9.286791951  |
| C | 3.284760297  | 2.684078565 | 9.749827283  |
| C | 3.325451953  | 1.731431742 | 10.808866853 |
| H | 4.214569302  | 1.118709851 | 10.936895362 |
| C | 2.277990294  | 1.648851441 | 11.677712078 |
| H | 2.355230302  | 0.967593890 | 12.509036888 |
| C | 1.146730263  | 2.461528490 | 11.490763228 |
| H | 0.312989493  | 2.398956186 | 12.184659225 |
| C | 1.058089867  | 3.361975100 | 10.416574953 |
| H | 0.162974612  | 3.956261768 | 10.287650812 |
| C | 2.111157461  | 3.488039356 | 9.552761675  |
| H | 2.067443287  | 4.196203385 | 8.732580543  |
| C | 13.916720974 | 6.480287816 | 3.465830374  |
| H | 14.262541852 | 7.264664498 | 2.808489967  |
| C | 12.629178010 | 6.533514687 | 3.956912312  |
| H | 11.946020553 | 7.340216298 | 3.705843388  |
| N | 12.126000456 | 5.576241351 | 4.785446533  |
| C | 12.951238406 | 4.565619758 | 5.182655591  |
| H | 12.530584086 | 3.832410817 | 5.864385296  |
| C | 14.252221519 | 4.469597572 | 4.732449468  |
| H | 14.873778458 | 3.658597914 | 5.084612070  |
| C | 14.748207554 | 5.415774542 | 3.829719591  |
| C | 16.116252083 | 5.220150392 | 3.320272901  |
| H | 16.617072787 | 4.368313750 | 3.750332494  |
| C | 16.760956452 | 5.965965737 | 2.412067949  |
| H | 16.253090070 | 6.819758673 | 1.986864536  |
| C | 18.165488546 | 5.804951494 | 1.994803925  |
| C | 18.750179081 | 6.816580752 | 1.234708018  |
| H | 18.135880867 | 7.636416437 | 0.881741274  |
| C | 20.113854723 | 6.806417585 | 0.985531247  |
| H | 20.562060338 | 7.612395758 | 0.420349958  |
| C | 20.900019812 | 5.778043095 | 1.481001736  |

|   |              |             |             |
|---|--------------|-------------|-------------|
| H | 21.970061242 | 5.776060321 | 1.316541903 |
| C | 20.318572339 | 4.740815422 | 2.202956971 |
| H | 20.932552359 | 3.936616242 | 2.587258338 |
| C | 18.963378297 | 4.752365599 | 2.456848865 |
| H | 18.522259053 | 3.952483416 | 3.034034900 |

**CI(T<sub>BLPP</sub>/T<sub>ALPP</sub>)**

|    |              |              |              |
|----|--------------|--------------|--------------|
| Ag | 10.454490820 | 1.448870110  | 3.785460291  |
| Ag | 10.169720804 | 5.556990412  | 5.541320415  |
| C  | 6.326440485  | 2.669090207  | 4.262090329  |
| H  | 5.816630436  | 3.579370274  | 3.984430307  |
| C  | 7.662910595  | 2.530460193  | 3.951020304  |
| H  | 8.197980656  | 3.325800258  | 3.441300262  |
| N  | 8.380670635  | 1.414330107  | 4.284950331  |
| C  | 7.710510618  | 0.394960028  | 4.894490379  |
| H  | 8.297850638  | -0.495880035 | 5.100420393  |
| C  | 6.372870497  | 0.479200035  | 5.234670402  |
| H  | 5.897740449  | -0.364460030 | 5.715560439  |
| C  | 5.659280427  | 1.647560127  | 4.949420380  |
| C  | 4.257390330  | 1.880330144  | 5.337180396  |
| H  | 3.809770291  | 2.736900213  | 4.864070376  |
| C  | 3.534600270  | 1.183780090  | 6.257530495  |
| H  | 4.008120307  | 0.345630025  | 6.748380494  |
| C  | 2.116440163  | 1.371510106  | 6.606820500  |
| C  | 1.534100117  | 0.424570035  | 7.450400579  |
| H  | 2.157100164  | -0.337070027 | 7.902890626  |
| C  | 0.165920013  | 0.406870030  | 7.653370588  |
| H  | -0.254890017 | -0.368650029 | 8.275440617  |
| C  | -0.644090052 | 1.348470104  | 7.037140559  |
| H  | -1.720230134 | 1.327110102  | 7.169360575  |
| C  | -0.069890006 | 2.325680181  | 6.227620497  |
| H  | -0.700360056 | 3.060610234  | 5.742570439  |
| C  | 1.294320100  | 2.344130179  | 6.018480440  |
| H  | 1.720180132  | 3.104430238  | 5.378510409  |
| C  | 13.277151001 | 3.384140261  | 1.054680082  |
| H  | 13.176461006 | 4.155210320  | 0.304380023  |
| C  | 12.173910947 | 3.011960234  | 1.787580136  |
| H  | 11.206470847 | 3.481480267  | 1.633210126  |
| N  | 12.214740941 | 2.033100155  | 2.748440214  |
| C  | 13.413301057 | 1.439550113  | 2.992450230  |
| H  | 13.417591044 | 0.680560054  | 3.769270287  |
| C  | 14.557141123 | 1.780040138  | 2.290220178  |
| H  | 15.492451169 | 1.289310098  | 2.521430196  |
| C  | 14.507511124 | 2.746600212  | 1.288790097  |
| C  | 15.740091198 | 2.985800229  | 0.511510037  |
| H  | 16.549261263 | 2.327450179  | 0.784890063  |
| C  | 15.943161221 | 3.899320301  | -0.450500033 |
| H  | 15.144541152 | 4.584480354  | -0.698710055 |
| C  | 17.151201336 | 4.046530310  | -1.284950101 |
| C  | 17.131371318 | 4.995770385  | -2.302160179 |
| H  | 16.301601230 | 5.681550428  | -2.365630180 |

|   |              |             |              |
|---|--------------|-------------|--------------|
| C | 18.155031421 | 5.057070389 | -3.231270246 |
| H | 18.108261413 | 5.771110450 | -4.043830310 |
| C | 19.256471478 | 4.228320327 | -3.103700238 |
| H | 20.068791523 | 4.302340334 | -3.816770296 |
| C | 19.323801504 | 3.327110257 | -2.045080156 |
| H | 20.197661529 | 2.700390205 | -1.925230146 |
| C | 18.275301398 | 3.224900248 | -1.153360087 |
| H | 18.322741397 | 2.511510192 | -0.343210028 |
| C | 6.034520438  | 5.228380400 | 6.644060502  |
| H | 5.130050393  | 5.744940465 | 6.354340509  |
| C | 7.268890560  | 5.664620461 | 6.208660499  |
| H | 7.389580545  | 6.563130515 | 5.617330430  |
| N | 8.411090653  | 4.992800383 | 6.515550495  |
| C | 8.336370667  | 3.863420297 | 7.285290557  |
| H | 9.276050711  | 3.358970257 | 7.478330554  |
| C | 7.149880555  | 3.414640265 | 7.806920574  |
| H | 7.149000533  | 2.548000196 | 8.453450657  |
| C | 5.967020440  | 4.121400318 | 7.495580569  |
| C | 4.693570361  | 3.835740295 | 8.095760598  |
| H | 3.890100297  | 4.500880345 | 7.815270621  |
| C | 4.474440343  | 2.850680222 | 9.022960685  |
| H | 5.285280406  | 2.184270167 | 9.284070710  |
| C | 3.286500253  | 2.677050208 | 9.757410763  |
| C | 3.333960256  | 1.722960133 | 10.809470856 |
| H | 4.226180324  | 1.114420087 | 10.931270843 |
| C | 2.288110174  | 1.628380124 | 11.681070924 |
| H | 2.371270183  | 0.941940070 | 12.507470947 |
| C | 1.153140087  | 2.433380187 | 11.502660879 |
| H | 0.321310023  | 2.361940179 | 12.196910949 |
| C | 1.059920079  | 3.337510257 | 10.434710809 |
| H | 0.161740015  | 3.927850305 | 10.309890808 |
| C | 2.111650162  | 3.473200268 | 9.569000749  |
| H | 2.062770160  | 4.184580324 | 8.752400665  |
| C | 13.910381060 | 6.488770475 | 3.452250268  |
| H | 14.257411108 | 7.271850566 | 2.793990214  |
| C | 12.622130957 | 6.543690500 | 3.941820304  |
| H | 11.939760916 | 7.350580552 | 3.689080286  |
| N | 12.117970933 | 5.588260448 | 4.772090369  |
| C | 12.942541007 | 4.577670351 | 5.171290398  |
| H | 12.521120968 | 3.845670295 | 5.853800428  |
| C | 14.243861101 | 4.480280343 | 4.722990362  |
| H | 14.864741169 | 3.669710282 | 5.077410391  |
| C | 14.741311157 | 5.424810402 | 3.819510296  |
| C | 16.110451242 | 5.227090403 | 3.313660254  |
| H | 16.609471262 | 4.375990334 | 3.747220286  |
| C | 16.758911287 | 5.970280437 | 2.405040184  |
| H | 16.253661264 | 6.823550545 | 1.975690154  |
| C | 18.165131404 | 5.805890466 | 1.994150153  |
| C | 18.754741436 | 6.814190511 | 1.233580093  |
| H | 18.143421378 | 7.633990582 | 0.875380066  |
| C | 20.119491572 | 6.800950549 | 0.990470074  |
| H | 20.571531606 | 7.604450585 | 0.424810033  |

|   |              |             |             |
|---|--------------|-------------|-------------|
| C | 20.901761599 | 5.772770426 | 1.492510114 |
| H | 21.972531706 | 5.768490440 | 1.332770103 |
| C | 20.315371558 | 4.738730363 | 2.215030171 |
| H | 20.926261606 | 3.934650301 | 2.604460202 |
| C | 18.959121437 | 4.753430367 | 2.462980188 |
| H | 18.514191429 | 3.956020304 | 3.040660236 |

**[A...B]<sub>CT</sub> complex-1**

|    |              |              |              |
|----|--------------|--------------|--------------|
| Ag | 10.465874428 | 1.416986323  | 3.822730800  |
| Ag | 10.153078762 | 5.611432538  | 5.506913152  |
| C  | 6.341422922  | 2.669567398  | 4.271524585  |
| H  | 5.834464026  | 3.580100888  | 3.989704833  |
| C  | 7.678236256  | 2.526660044  | 3.965941711  |
| H  | 8.218690537  | 3.318608480  | 3.455564949  |
| N  | 8.389721153  | 1.406782547  | 4.301234316  |
| C  | 7.711726720  | 0.390653099  | 4.908933785  |
| H  | 8.292289779  | -0.504488425 | 5.115087372  |
| C  | 6.374949158  | 0.483415194  | 5.246665411  |
| H  | 5.892696120  | -0.356387895 | 5.726607384  |
| C  | 5.667831561  | 1.653187525  | 4.957843590  |
| C  | 4.261406013  | 1.888158363  | 5.340774409  |
| H  | 3.816557005  | 2.747365291  | 4.873264000  |
| C  | 3.546705253  | 1.195789952  | 6.246812486  |
| H  | 4.016625011  | 0.352911598  | 6.730818371  |
| C  | 2.124141513  | 1.388394765  | 6.598013085  |
| C  | 1.540364263  | 0.438096334  | 7.432243926  |
| H  | 2.160182272  | -0.332368699 | 7.873522558  |
| C  | 0.172295739  | 0.426552420  | 7.640560318  |
| H  | -0.249912768 | -0.352429528 | 8.257047527  |
| C  | -0.632832462 | 1.380527132  | 7.038834508  |
| H  | -1.708086976 | 1.366790532  | 7.176816577  |
| C  | -0.054181877 | 2.361035027  | 6.237695714  |
| H  | -0.680134944 | 3.106514344  | 5.763616665  |
| C  | 1.309415219  | 2.370035988  | 6.021287673  |
| H  | 1.738659837  | 3.134135089  | 5.388459153  |
| C  | 13.275544577 | 3.352440242  | 1.056541685  |
| H  | 13.174106537 | 4.114996389  | 0.297612723  |
| C  | 12.171297447 | 2.982921055  | 1.789626814  |
| H  | 11.201734076 | 3.445886980  | 1.627814254  |
| N  | 12.214669555 | 2.013782439  | 2.759915428  |
| C  | 13.415135079 | 1.428277150  | 3.011417165  |
| H  | 13.422422009 | 0.676492305  | 3.794684390  |
| C  | 14.559321810 | 1.764361913  | 2.308176898  |
| H  | 15.494895438 | 1.276676976  | 2.545185159  |
| C  | 14.507305221 | 2.722116646  | 1.299410647  |
| C  | 15.739719187 | 2.964265525  | 0.521610073  |
| H  | 16.554036929 | 2.313440079  | 0.797144199  |
| C  | 15.931652992 | 3.880688541  | -0.446381735 |
| H  | 15.125601475 | 4.556956025  | -0.693449838 |
| C  | 17.138863674 | 4.040122243  | -1.281418044 |
| C  | 17.108283685 | 4.993809545  | -2.293674991 |

|   |              |             |              |
|---|--------------|-------------|--------------|
| H | 16.271150890 | 5.671022817 | -2.356905497 |
| C | 18.133510735 | 5.072198587 | -3.219485903 |
| H | 18.078301831 | 5.788380096 | -4.029868735 |
| C | 19.246070499 | 4.258561664 | -3.091001540 |
| H | 20.060702255 | 4.347770428 | -3.799251507 |
| C | 19.321426556 | 3.352600641 | -2.037436895 |
| H | 20.203456179 | 2.737600748 | -1.917073508 |
| C | 18.271009717 | 3.230859705 | -1.150407727 |
| H | 18.327483513 | 2.513588456 | -0.344314636 |
| C | 6.044719588  | 5.233345734 | 6.647414057  |
| H | 5.138259265  | 5.741510074 | 6.357185630  |
| C | 7.268456582  | 5.667963750 | 6.213479399  |
| H | 7.382499148  | 6.560551464 | 5.614149281  |
| N | 8.427393811  | 5.014503382 | 6.514384241  |
| C | 8.343110956  | 3.881952984 | 7.289085605  |
| H | 9.283344361  | 3.372535451 | 7.481555996  |
| C | 7.161722483  | 3.431186658 | 7.810542634  |
| H | 7.154802433  | 2.565116048 | 8.455914930  |
| C | 5.963867285  | 4.130432733 | 7.509801996  |
| C | 4.714044911  | 3.840341083 | 8.096690892  |
| H | 3.904909857  | 4.495764249 | 7.826348629  |
| C | 4.481300877  | 2.780796243 | 9.066194625  |
| H | 5.283962141  | 2.107215403 | 9.311397423  |
| C | 3.327702846  | 2.642708398 | 9.763890433  |
| C | 3.304860502  | 1.660958726 | 10.830517929 |
| H | 4.172436564  | 1.026365384 | 10.956339874 |
| C | 2.257267575  | 1.596114907 | 11.663451756 |
| H | 2.306766556  | 0.898151489 | 12.481907876 |
| C | 1.124505993  | 2.438653925 | 11.479188534 |
| H | 0.279900868  | 2.377152485 | 12.150240849 |
| C | 1.088202233  | 3.352968371 | 10.411552373 |
| H | 0.207068501  | 3.965106325 | 10.269002447 |
| C | 2.146544523  | 3.472438449 | 9.572372243  |
| H | 2.122891681  | 4.182745376 | 8.759484391  |
| C | 13.902695237 | 6.481185036 | 3.418804324  |
| H | 14.253819105 | 7.255731563 | 2.752687533  |
| C | 12.611129203 | 6.541748367 | 3.899090029  |
| H | 11.930583554 | 7.346205791 | 3.633907493  |
| N | 12.103586942 | 5.599854351 | 4.742383697  |
| C | 12.927554549 | 4.591771173 | 5.156655202  |
| H | 12.506019837 | 3.866514777 | 5.846127040  |
| C | 14.230696547 | 4.486458868 | 4.714804804  |
| H | 14.853516049 | 3.680805472 | 5.079097741  |
| C | 14.731079357 | 5.422640087 | 3.802897972  |
| C | 16.104167104 | 5.224483179 | 3.306199406  |
| H | 16.606548034 | 4.379320595 | 3.746539606  |
| C | 16.753581520 | 5.968678352 | 2.391319470  |
| H | 16.247256632 | 6.820099939 | 1.960058703  |
| C | 18.164439293 | 5.806248983 | 1.987793174  |
| C | 18.754358999 | 6.813777912 | 1.227481394  |
| H | 18.143227064 | 7.631838154 | 0.865316935  |
| C | 20.120036360 | 6.802448068 | 0.988327785  |

|   |              |             |             |
|---|--------------|-------------|-------------|
| H | 20.571556265 | 7.605864177 | 0.422123700 |
| C | 20.903276316 | 5.776760634 | 1.493572834 |
| H | 21.974557026 | 5.774341077 | 1.334704595 |
| C | 20.316146167 | 4.743687389 | 2.217440134 |
| H | 20.926553394 | 3.940758800 | 2.610164548 |
| C | 18.959118050 | 4.757335844 | 2.462433421 |
| H | 18.515199617 | 3.960006152 | 3.040700940 |

### Transition-1

|    |              |              |              |
|----|--------------|--------------|--------------|
| Ag | 10.245380768 | 1.489290112  | 3.595670278  |
| Ag | 10.177570778 | 5.779630468  | 5.479110444  |
| C  | 6.228230480  | 2.787210216  | 4.430820341  |
| H  | 5.718620459  | 3.702170284  | 4.172600323  |
| C  | 7.489810579  | 2.563930199  | 3.917890300  |
| H  | 7.964860615  | 3.297400251  | 3.272370252  |
| N  | 8.211290628  | 1.434280111  | 4.210360326  |
| C  | 7.601090574  | 0.487870038  | 4.981260382  |
| H  | 8.175900630  | -0.418610034 | 5.155830395  |
| C  | 6.339750510  | 0.665520053  | 5.528810401  |
| H  | 5.927170430  | -0.118150008 | 6.149330469  |
| C  | 5.639700446  | 1.852910142  | 5.295200394  |
| C  | 4.339290336  | 2.191590170  | 5.923600441  |
| H  | 3.820270295  | 2.946820229  | 5.353240396  |
| C  | 3.461610265  | 1.159290089  | 6.455260484  |
| H  | 3.921140300  | 0.276510020  | 6.864820550  |
| C  | 2.028370157  | 1.292880097  | 6.673850535  |
| C  | 1.403190106  | 0.288330024  | 7.423240557  |
| H  | 2.011330152  | -0.482230035 | 7.880970622  |
| C  | 0.029360003  | 0.243680016  | 7.535300560  |
| H  | -0.413420033 | -0.579240047 | 8.074420626  |
| C  | -0.756300061 | 1.224620095  | 6.941210514  |
| H  | -1.837490139 | 1.189340091  | 7.017740551  |
| C  | -0.145490014 | 2.253950174  | 6.229590465  |
| H  | -0.753650058 | 3.017370230  | 5.759700436  |
| C  | 1.230720096  | 2.294030175  | 6.096450475  |
| H  | 1.683850129  | 3.095790239  | 5.528880411  |
| C  | 13.227271018 | 3.432250262  | 1.055820083  |
| H  | 13.175041011 | 4.243170327  | 0.343110024  |
| C  | 12.089480929 | 3.068620237  | 1.741140133  |
| H  | 11.146210841 | 3.584910273  | 1.584480119  |
| N  | 12.062820926 | 2.036750155  | 2.648750205  |
| C  | 13.233680995 | 1.383950105  | 2.891870220  |
| H  | 13.191901022 | 0.582160047  | 3.623470276  |
| C  | 14.410041119 | 1.718550134  | 2.239980175  |
| H  | 15.320281181 | 1.182410092  | 2.470130193  |
| C  | 14.426391109 | 2.733880209  | 1.286380097  |
| C  | 15.685561229 | 2.962960230  | 0.545250040  |
| H  | 16.476701272 | 2.277580176  | 0.807010063  |
| C  | 15.912741203 | 3.909640300  | -0.403290030 |
| H  | 15.122221144 | 4.608940356  | -0.634090047 |
| C  | 17.118731338 | 4.064740315  | -1.240320096 |

|   |              |             |              |
|---|--------------|-------------|--------------|
| C | 17.085681308 | 5.027100388 | -2.247360171 |
| H | 16.250831224 | 5.711540438 | -2.296810176 |
| C | 18.102831366 | 5.100820393 | -3.185400247 |
| H | 18.044091369 | 5.819500428 | -3.993620306 |
| C | 19.210771466 | 4.275030327 | -3.073240234 |
| H | 20.019161523 | 4.361030334 | -3.790660293 |
| C | 19.288821459 | 3.360740260 | -2.024940157 |
| H | 20.166751545 | 2.736300210 | -1.917640146 |
| C | 18.244931386 | 3.241980248 | -1.126890085 |
| H | 18.300491399 | 2.515490192 | -0.327650026 |
| C | 6.080050478  | 5.203440398 | 6.611340520  |
| H | 5.153130395  | 5.680850433 | 6.326140495  |
| C | 7.293560539  | 5.772100435 | 6.271410496  |
| H | 7.370730563  | 6.709690493 | 5.736070449  |
| N | 8.478340668  | 5.174540399 | 6.562490528  |
| C | 8.453270631  | 3.991310309 | 7.258760573  |
| H | 9.420120699  | 3.541620272 | 7.467520575  |
| C | 7.277100534  | 3.395720263 | 7.652460615  |
| H | 7.307210560  | 2.470010191 | 8.209080625  |
| C | 6.056000483  | 3.997430308 | 7.299750537  |
| C | 4.749110365  | 3.389760261 | 7.598850567  |
| H | 3.947120305  | 4.096710315 | 7.449610571  |
| C | 4.602810356  | 2.589550199 | 8.813680661  |
| H | 5.399980400  | 1.917070148 | 9.083930688  |
| C | 3.447270265  | 2.591830202 | 9.688190727  |
| C | 3.468030264  | 1.716240132 | 10.781650844 |
| H | 4.325270335  | 1.069380081 | 10.922100836 |
| C | 2.414700188  | 1.685250131 | 11.671000893 |
| H | 2.463600188  | 1.014190079 | 12.516010968 |
| C | 1.310790101  | 2.508640194 | 11.477990900 |
| H | 0.474840038  | 2.472380191 | 12.164840955 |
| C | 1.275010099  | 3.377960259 | 10.393450806 |
| H | 0.411560033  | 4.013230307 | 10.240300772 |
| C | 2.333860177  | 3.428120261 | 9.507710752  |
| H | 2.296880175  | 4.112270317 | 8.670890647  |
| C | 13.965831057 | 6.534100486 | 3.375850260  |
| H | 14.358881110 | 7.312360566 | 2.736620209  |
| C | 12.665000981 | 6.629820501 | 3.829360295  |
| H | 12.020100923 | 7.464470556 | 3.565880276  |
| N | 12.105550931 | 5.690780444 | 4.645900360  |
| C | 12.887610980 | 4.643470357 | 5.051770388  |
| H | 12.426660977 | 3.916830300 | 5.715700459  |
| C | 14.195851072 | 4.499600345 | 4.632920356  |
| H | 14.777791155 | 3.659350282 | 4.989260383  |
| C | 14.752921148 | 5.440660425 | 3.756500288  |
| C | 16.136181216 | 5.213660403 | 3.298130252  |
| H | 16.609291289 | 4.359770337 | 3.755080288  |
| C | 16.829191318 | 5.945570452 | 2.405720182  |
| H | 16.348641277 | 6.802130509 | 1.955310152  |
| C | 18.250331428 | 5.766380452 | 2.045320159  |
| C | 18.867171439 | 6.757520496 | 1.281140099  |
| H | 18.271451421 | 7.574320609 | 0.890190070  |



|   |              |             |             |
|---|--------------|-------------|-------------|
| C | 20.238331552 | 6.730420536 | 1.070670082 |
| H | 20.707951595 | 7.520190592 | 0.498980040 |
| C | 21.003261605 | 5.705280430 | 1.609110124 |
| H | 22.077901692 | 5.690350434 | 1.468890113 |
| C | 20.391261555 | 4.690270359 | 2.340980177 |
| H | 20.986461603 | 3.888730300 | 2.760860210 |
| C | 19.027401442 | 4.718900361 | 2.556160194 |
| H | 18.563961448 | 3.932110303 | 3.135100240 |

### STC( $T_{ALPP}/S_0$ )

|    |              |              |              |
|----|--------------|--------------|--------------|
| Ag | 10.251800799 | 1.490890117  | 3.603090279  |
| Ag | 10.177370802 | 5.788410471  | 5.491090435  |
| C  | 6.234880491  | 2.789900214  | 4.434870341  |
| H  | 5.726640458  | 3.705800287  | 4.177450322  |
| C  | 7.496860595  | 2.566410199  | 3.923680303  |
| H  | 7.973660621  | 3.300650252  | 3.280350250  |
| N  | 8.216720622  | 1.435660110  | 4.214970323  |
| C  | 7.604390577  | 0.488280039  | 4.983100384  |
| H  | 8.178020620  | -0.419090035 | 5.156770399  |
| C  | 6.342120483  | 0.666060052  | 5.528850406  |
| H  | 5.927620442  | -0.118420010 | 6.147000449  |
| C  | 5.643730448  | 1.854630143  | 5.296180431  |
| C  | 4.381060339  | 2.308040180  | 6.081720455  |
| H  | 3.844940295  | 3.007960230  | 5.431580431  |
| C  | 3.481110267  | 1.219010091  | 6.529080499  |
| H  | 3.938210304  | 0.334780028  | 6.938180551  |
| C  | 2.047500158  | 1.354310104  | 6.744110510  |
| C  | 1.418780107  | 0.349070026  | 7.489490585  |
| H  | 2.024500157  | -0.423320034 | 7.947310611  |
| C  | 0.044600006  | 0.306000025  | 7.597310608  |
| H  | -0.400850030 | -0.517520040 | 8.133270640  |
| C  | -0.737930059 | 1.289200098  | 7.002960524  |
| H  | -1.819380138 | 1.255230099  | 7.076130551  |
| C  | -0.123650011 | 2.319160178  | 6.295390481  |
| H  | -0.729390054 | 3.084330239  | 5.825280473  |
| C  | 1.252950097  | 2.357620182  | 6.166360451  |
| H  | 1.708830132  | 3.159820242  | 5.601650432  |
| C  | 13.230050997 | 3.432050265  | 1.057730079  |
| H  | 13.175781013 | 4.239470324  | 0.341250025  |
| C  | 12.093130929 | 3.068270233  | 1.744170134  |
| H  | 11.148430845 | 3.581030277  | 1.584650123  |
| N  | 12.068850954 | 2.040330155  | 2.656210202  |
| C  | 13.241401003 | 1.392010109  | 2.902850224  |
| H  | 13.201481035 | 0.593220047  | 3.637820277  |
| C  | 14.417121088 | 1.727070131  | 2.249990171  |
| H  | 15.328731189 | 1.194450092  | 2.482780191  |
| C  | 14.430941134 | 2.738050210  | 1.291740101  |
| C  | 15.689471214 | 2.966640229  | 0.549450040  |
| H  | 16.482091260 | 2.284190177  | 0.814310064  |
| C  | 15.914531250 | 3.908790303  | -0.403600032 |
| H  | 15.122681157 | 4.605450352  | -0.637800050 |

|   |              |             |              |
|---|--------------|-------------|--------------|
| C | 17.120011311 | 4.061330313 | -1.241780096 |
| C | 17.085471330 | 5.018420383 | -2.253700174 |
| H | 16.249981260 | 5.701740446 | -2.306230176 |
| C | 18.101971400 | 5.088360391 | -3.192610244 |
| H | 18.042021386 | 5.802770437 | -4.004520309 |
| C | 19.210861479 | 4.264460328 | -3.076720236 |
| H | 20.018761518 | 4.347630334 | -3.794990291 |
| C | 19.290481488 | 3.355810259 | -2.023730156 |
| H | 20.169141574 | 2.732920212 | -1.913640148 |
| C | 18.247161392 | 3.240520248 | -1.124640087 |
| H | 18.303821405 | 2.518200193 | -0.321770026 |
| C | 6.079710482  | 5.207510401 | 6.620280493  |
| H | 5.152700396  | 5.685180426 | 6.335910482  |
| C | 7.293230544  | 5.778060452 | 6.283240465  |
| H | 7.370350561  | 6.717270534 | 5.750820418  |
| N | 8.478170643  | 5.180110397 | 6.572960511  |
| C | 8.453190672  | 3.994690307 | 7.265160549  |
| H | 9.420130700  | 3.544750271 | 7.472950568  |
| C | 7.277270558  | 3.397280261 | 7.656100613  |
| H | 7.307580561  | 2.469640190 | 8.209450626  |
| C | 6.056070440  | 3.999160310 | 7.304470586  |
| C | 4.711000364  | 3.274980250 | 7.440460567  |
| H | 3.927980302  | 4.038440312 | 7.371970584  |
| C | 4.583980351  | 2.528550197 | 8.733130676  |
| H | 5.381600434  | 1.856260141 | 9.002550689  |
| C | 3.427180263  | 2.526880193 | 9.605910756  |
| C | 3.447380265  | 1.648210126 | 10.696780815 |
| H | 4.305230329  | 1.002100078 | 10.836740842 |
| C | 2.392650182  | 1.613230124 | 11.584230906 |
| H | 2.441110186  | 0.939840072 | 12.427310966 |
| C | 1.287960098  | 2.435580189 | 11.391810892 |
| H | 0.450970038  | 2.396150187 | 12.077170943 |
| C | 1.252750094  | 3.307950252 | 10.309810797 |
| H | 0.388680028  | 3.942440304 | 10.157090772 |
| C | 2.312960179  | 3.362130260 | 9.426020708  |
| H | 2.276360174  | 4.048600314 | 8.591110668  |
| C | 13.965621079 | 6.541300524 | 3.387110263  |
| H | 14.359111090 | 7.319570553 | 2.748200211  |
| C | 12.665470997 | 6.638520492 | 3.842140296  |
| H | 12.021450907 | 7.474290551 | 3.580130273  |
| N | 12.105380906 | 5.699150440 | 4.657750358  |
| C | 12.886260996 | 4.650240359 | 5.061560389  |
| H | 12.424710959 | 3.923270302 | 5.724710442  |
| C | 14.193801092 | 4.504930345 | 4.641330358  |
| H | 14.774701131 | 3.663170281 | 4.995730385  |
| C | 14.751271120 | 5.446030410 | 3.765360292  |
| C | 16.133101246 | 5.216790402 | 3.303910254  |
| H | 16.605761253 | 4.361800335 | 3.759250290  |
| C | 16.824831268 | 5.947660438 | 2.409690187  |
| H | 16.344371240 | 6.804960549 | 1.960600152  |
| C | 18.244491428 | 5.766040456 | 2.044910158  |
| C | 18.860421466 | 6.755950533 | 1.278550099  |

|   |              |             |             |
|---|--------------|-------------|-------------|
| H | 18.264801410 | 7.573690570 | 0.889450069 |
| C | 20.230741563 | 6.726440540 | 1.063520083 |
| H | 20.699791576 | 7.515300570 | 0.490150041 |
| C | 20.995641611 | 5.700120422 | 1.599560120 |
| H | 22.069721723 | 5.683320420 | 1.455760114 |
| C | 20.384391564 | 4.686320363 | 2.333610178 |
| H | 20.979591613 | 3.883840300 | 2.751620209 |
| C | 19.021371467 | 4.717330361 | 2.553310199 |
| H | 18.558481448 | 3.931480302 | 3.133880243 |

## Reactant2

|    |              |              |              |
|----|--------------|--------------|--------------|
| Ag | 10.291867243 | 1.561653186  | 3.622903051  |
| Ag | 10.181832825 | 5.604017653  | 5.684439577  |
| C  | 6.268132772  | 2.777514344  | 4.432280341  |
| H  | 5.750886248  | 3.685692779  | 4.167139065  |
| C  | 7.533586184  | 2.573459401  | 3.925162259  |
| H  | 8.005225832  | 3.307496477  | 3.277071267  |
| N  | 8.277317026  | 1.460406073  | 4.232045560  |
| C  | 7.672563582  | 0.515959375  | 5.011669394  |
| H  | 8.263475496  | -0.378217532 | 5.195134432  |
| C  | 6.406958349  | 0.686396916  | 5.564553572  |
| H  | 6.009430081  | -0.090229621 | 6.204521063  |
| C  | 5.689918626  | 1.854987851  | 5.316685732  |
| C  | 4.396376200  | 2.277693425  | 5.993389819  |
| H  | 3.772706537  | 2.727471618  | 5.229773766  |
| C  | 3.640185731  | 1.347269686  | 6.965273844  |
| H  | 3.983900388  | 0.309190371  | 6.931508684  |
| C  | 2.120374760  | 1.333390844  | 6.884230295  |
| C  | 1.470186020  | 0.299020706  | 7.553367835  |
| H  | 2.059278569  | -0.466374572 | 8.042747569  |
| C  | 0.090186864  | 0.222891542  | 7.567156237  |
| H  | -0.377765403 | -0.616076435 | 8.061559132  |
| C  | -0.670852461 | 1.197280057  | 6.938052701  |
| H  | -1.754731204 | 1.146130531  | 6.945874312  |
| C  | -0.031665956 | 2.241238950  | 6.284678134  |
| H  | -0.618082715 | 3.002798170  | 5.786008642  |
| C  | 1.353828611  | 2.315954263  | 6.262795861  |
| H  | 1.824718520  | 3.151193234  | 5.761222138  |
| C  | 13.254322664 | 3.421391953  | 1.038516368  |
| H  | 13.198575217 | 4.207756187  | 0.301527647  |
| C  | 12.119803315 | 3.077462603  | 1.736501313  |
| H  | 11.173324348 | 3.582787452  | 1.570098278  |
| N  | 12.092614452 | 2.081475131  | 2.682818890  |
| C  | 13.272622037 | 1.446200622  | 2.942379299  |
| H  | 13.231394526 | 0.675121043  | 3.704319146  |
| C  | 14.443353674 | 1.763453331  | 2.277817295  |
| H  | 15.357271994 | 1.243173965  | 2.527237387  |
| C  | 14.459967247 | 2.744916026  | 1.286993688  |
| C  | 15.714128704 | 2.959478085  | 0.550433299  |
| H  | 16.510390230 | 2.297240656  | 0.848402371  |
| C  | 15.954470215 | 3.857460978  | -0.420410247 |

|   |              |             |              |
|---|--------------|-------------|--------------|
| H | 15.164297614 | 4.540751755 | -0.693511386 |
| C | 17.176902840 | 3.988704963 | -1.223837897 |
| C | 17.178472962 | 4.907898630 | -2.266711055 |
| H | 16.341309315 | 5.580016608 | -2.372008967 |
| C | 18.226780553 | 4.952811443 | -3.173733947 |
| H | 18.193888483 | 5.636958673 | -4.010009057 |
| C | 19.338151680 | 4.144746830 | -2.995503784 |
| H | 20.169840141 | 4.213310341 | -3.688661849 |
| C | 19.385466476 | 3.272881924 | -1.909700862 |
| H | 20.263822973 | 2.663531666 | -1.749112993 |
| C | 18.309573880 | 3.181464094 | -1.043725938 |
| H | 18.339997232 | 2.491851791 | -0.215006955 |
| C | 6.041234110  | 5.202720479 | 6.583904585  |
| H | 5.148602342  | 5.685165662 | 6.209215924  |
| C | 7.287311538  | 5.750709873 | 6.336771136  |
| H | 7.430315181  | 6.677929645 | 5.793498987  |
| N | 8.437726420  | 5.118903068 | 6.704856882  |
| C | 8.327316021  | 3.954501327 | 7.422802610  |
| H | 9.267684154  | 3.481533730 | 7.691803356  |
| C | 7.109498563  | 3.385921175 | 7.726250731  |
| H | 7.077767084  | 2.462171944 | 8.286443905  |
| C | 5.937381011  | 3.986333958 | 7.246799156  |
| C | 4.611478533  | 3.285395633 | 7.220094015  |
| H | 3.824807223  | 4.029086490 | 7.166252188  |
| C | 4.234736162  | 2.164683750 | 8.197446558  |
| H | 5.124478696  | 1.650476365 | 8.570985263  |
| C | 3.341100206  | 2.473547799 | 9.383789823  |
| C | 3.438923812  | 1.659345137 | 10.509285166 |
| H | 4.222407025  | 0.913114859 | 10.556322832 |
| C | 2.540500093  | 1.795416526 | 11.554741075 |
| H | 2.628053686  | 1.153726394 | 12.420482357 |
| C | 1.533034428  | 2.746621940 | 11.487476243 |
| H | 0.808964146  | 2.835047310 | 12.288155712 |
| C | 1.444012522  | 3.578632845 | 10.382031426 |
| H | 0.656111652  | 4.319133736 | 10.326400715 |
| C | 2.339674306  | 3.443195082 | 9.334593114  |
| H | 2.245214553  | 4.087726939 | 8.472269258  |
| C | 13.833085198 | 6.490524856 | 3.446390376  |
| H | 14.167945491 | 7.272435413 | 2.778590490  |
| C | 12.550710285 | 6.541157329 | 3.951949926  |
| H | 11.859829539 | 7.342914414 | 3.707664689  |
| N | 12.059395827 | 5.593633185 | 4.806711547  |
| C | 12.904788867 | 4.588549272 | 5.193570279  |
| H | 12.497204115 | 3.858562376 | 5.887263798  |
| C | 14.196268751 | 4.493505816 | 4.720437748  |
| H | 14.825442720 | 3.684550153 | 5.064092910  |
| C | 14.682554491 | 5.437146582 | 3.805002208  |
| C | 16.044528722 | 5.249815508 | 3.294298754  |
| H | 16.555172808 | 4.405133289 | 3.725734515  |
| C | 16.697049673 | 6.002262745 | 2.385461859  |
| H | 16.185466139 | 6.852275080 | 1.957644967  |
| C | 18.101021210 | 5.849229342 | 1.979491150  |

|   |              |             |             |
|---|--------------|-------------|-------------|
| C | 18.685420486 | 6.852240790 | 1.200650943 |
| H | 18.065457641 | 7.657234958 | 0.825967786 |
| C | 20.055478270 | 6.854551442 | 0.963150600 |
| H | 20.501313701 | 7.653024612 | 0.384110471 |
| C | 20.848176528 | 5.849352269 | 1.483939972 |
| H | 21.920673817 | 5.858238849 | 1.326427659 |
| C | 20.269948835 | 4.817313412 | 2.222553034 |
| H | 20.890408842 | 4.028241383 | 2.625610141 |
| C | 18.914801414 | 4.813985236 | 2.465077836 |
| H | 18.479711615 | 4.014551166 | 3.048703174 |

**CI(S<sub>BRPP</sub>/S<sub>BRPΣ</sub>)**

|    |              |              |             |
|----|--------------|--------------|-------------|
| Ag | 10.255743117 | 1.634975572  | 3.536944457 |
| Ag | 10.183683992 | 5.603898165  | 5.707054020 |
| C  | 6.228919468  | 2.801137790  | 4.420789120 |
| H  | 5.699917747  | 3.707136512  | 4.173706007 |
| C  | 7.486299646  | 2.612738079  | 3.890464662 |
| H  | 7.939704852  | 3.357011799  | 3.242404675 |
| N  | 8.241588460  | 1.503426199  | 4.173255735 |
| C  | 7.658605421  | 0.545815555  | 4.951257561 |
| H  | 8.258719092  | -0.345608106 | 5.116037197 |
| C  | 6.401482793  | 0.698697778  | 5.527811102 |
| H  | 6.021577821  | -0.088028413 | 6.165128738 |
| C  | 5.673295898  | 1.864731613  | 5.304218474 |
| C  | 4.386587378  | 2.281283295  | 5.999234158 |
| H  | 3.757379034  | 2.735490881  | 5.243202962 |
| C  | 3.636032828  | 1.343903325  | 6.972285389 |
| H  | 3.976360137  | 0.308853518  | 6.930981729 |
| C  | 2.117722249  | 1.335058075  | 6.901300442 |
| C  | 1.469887749  | 0.296426664  | 7.565075935 |
| H  | 2.059622556  | -0.473889202 | 8.045609677 |
| C  | 0.090331070  | 0.222936581  | 7.584666871 |
| H  | -0.377325165 | -0.618221910 | 8.074975098 |
| C  | -0.671309025 | 1.204011462  | 6.966247106 |
| H  | -1.754324759 | 1.155355715  | 6.978379236 |
| C  | -0.034096832 | 2.251809927  | 6.318309835 |
| H  | -0.621344088 | 3.018158100  | 5.828237991 |
| C  | 1.350646911  | 2.323797178  | 6.290859242 |
| H  | 1.820329064  | 3.161467629  | 5.793492319 |
| C  | 13.216221109 | 3.508074012  | 0.945404096 |
| H  | 13.158623340 | 4.291505165  | 0.203976980 |
| C  | 12.081517129 | 3.158818202  | 1.640302758 |
| H  | 11.133188265 | 3.656260808  | 1.466047722 |
| N  | 12.059891189 | 2.166042053  | 2.590846652 |
| C  | 13.238651662 | 1.533723226  | 2.862504068 |
| H  | 13.196085862 | 0.764838087  | 3.627914820 |
| C  | 14.412542487 | 1.852660206  | 2.206062342 |
| H  | 15.327315481 | 1.335870224  | 2.464767759 |
| C  | 14.426176633 | 2.836185432  | 1.209079350 |
| C  | 15.672893149 | 3.053634408  | 0.489020787 |
| H  | 16.468676246 | 2.398896034  | 0.806428122 |

|   |              |             |              |
|---|--------------|-------------|--------------|
| C | 15.926935430 | 3.959449489 | -0.513989555 |
| H | 15.147902486 | 4.642734049 | -0.820323306 |
| C | 17.138478222 | 4.046137808 | -1.259572946 |
| C | 17.212356816 | 4.951262515 | -2.356902793 |
| H | 16.401636580 | 5.641352061 | -2.517464595 |
| C | 18.273859813 | 4.926809075 | -3.205822054 |
| H | 18.291532587 | 5.582416638 | -4.069515716 |
| C | 19.390863713 | 4.071376203 | -2.961219369 |
| H | 20.243587023 | 4.099525099 | -3.631678466 |
| C | 19.386334591 | 3.227875410 | -1.837835470 |
| H | 20.243547441 | 2.602482005 | -1.627724982 |
| C | 18.275726909 | 3.194906149 | -1.003545838 |
| H | 18.255280505 | 2.537348007 | -0.148841082 |
| C | 6.039778872  | 5.197794251 | 6.606528182  |
| H | 5.148691249  | 5.687046357 | 6.238400155  |
| C | 7.286621967  | 5.744737843 | 6.365197956  |
| H | 7.429989207  | 6.677111431 | 5.832424524  |
| N | 8.434188605  | 5.107998683 | 6.726668775  |
| C | 8.324223509  | 3.936184561 | 7.430455836  |
| H | 9.262941350  | 3.458697689 | 7.695529928  |
| C | 7.107122028  | 3.365847122 | 7.726747681  |
| H | 7.074760669  | 2.436059772 | 8.276200198  |
| C | 5.935959111  | 3.974810753 | 7.255414056  |
| C | 4.610168581  | 3.274190193 | 7.227229653  |
| H | 3.823605355  | 4.018177808 | 7.185124501  |
| C | 4.238459130  | 2.146522530 | 8.199219407  |
| H | 5.126841891  | 1.627941420 | 8.560074846  |
| C | 3.354530794  | 2.449358483 | 9.391882689  |
| C | 3.454250034  | 1.629984807 | 10.513401848 |
| H | 4.232422715  | 0.878385179 | 10.553449294 |
| C | 2.563339780  | 1.768704468 | 11.565103476 |
| H | 2.650730196  | 1.124059003 | 12.428724186 |
| C | 1.562795356  | 2.727492156 | 11.507036275 |
| H | 0.845187445  | 2.819217967 | 12.311674042 |
| C | 1.472218860  | 3.564052942 | 10.405425188 |
| H | 0.689975080  | 4.310671346 | 10.357390499 |
| C | 2.359553219  | 3.425735376 | 9.352719869  |
| H | 2.264225171  | 4.074633633 | 8.494038764  |
| C | 13.854949690 | 6.453777994 | 3.480494902  |
| H | 14.195874408 | 7.230545689 | 2.810441049  |
| C | 12.571242997 | 6.514810440 | 3.981426368  |
| H | 11.886702483 | 7.319919440 | 3.729806852  |
| N | 12.073024681 | 5.574549942 | 4.836406159  |
| C | 12.908179941 | 4.565421417 | 5.230988021  |
| H | 12.494097791 | 3.839949217 | 5.925294020  |
| C | 14.202263747 | 4.459484735 | 4.764224096  |
| H | 14.824786963 | 3.647372318 | 5.113647406  |
| C | 14.695151132 | 5.396986950 | 3.847606507  |
| C | 16.061092552 | 5.201625865 | 3.338405847  |
| H | 16.570078143 | 4.358573952 | 3.775989769  |
| C | 16.711765087 | 5.949910393 | 2.425022362  |
| H | 16.199301425 | 6.797563497 | 1.993414486  |

|   |              |             |             |
|---|--------------|-------------|-------------|
| C | 18.119096211 | 5.796859103 | 2.018562582 |
| C | 18.699592012 | 6.796245846 | 1.234311156 |
| H | 18.078955154 | 7.599466741 | 0.856409093 |
| C | 20.077569885 | 6.797261390 | 0.995155415 |
| H | 20.521695597 | 7.593383690 | 0.412470324 |
| C | 20.867217278 | 5.799769155 | 1.518861638 |
| H | 21.938906778 | 5.808462267 | 1.361296085 |
| C | 20.289050916 | 4.766280034 | 2.267539271 |
| H | 20.912275504 | 3.980600201 | 2.674376307 |
| C | 18.940385493 | 4.761217565 | 2.511291869 |
| H | 18.509141913 | 3.964547583 | 3.100191771 |

**STC(S<sub>BRPE</sub>/T<sub>ARPP</sub>)**

|    |              |              |             |
|----|--------------|--------------|-------------|
| Ag | 10.252430785 | 1.690270129  | 3.515250269 |
| Ag | 10.153260799 | 5.624020448  | 5.664600458 |
| C  | 6.214530504  | 2.808290214  | 4.415980338 |
| H  | 5.669780415  | 3.704190286  | 4.164920320 |
| C  | 7.472780596  | 2.637060203  | 3.881910300 |
| H  | 7.911610620  | 3.384450258  | 3.226940248 |
| N  | 8.247650609  | 1.541300118  | 4.167420323 |
| C  | 7.682740613  | 0.579710046  | 4.955460382 |
| H  | 8.297560649  | -0.301340021 | 5.122380392 |
| C  | 6.425850506  | 0.717210055  | 5.537450436 |
| H  | 6.061060476  | -0.071250007 | 6.181800468 |
| C  | 5.676960451  | 1.869240145  | 5.308340395 |
| C  | 4.385590340  | 2.269380173  | 6.004220436 |
| H  | 3.747400286  | 2.706660209  | 5.245610406 |
| C  | 3.652700281  | 1.330730103  | 6.989970546 |
| H  | 4.009720306  | 0.299690026  | 6.959150522 |
| C  | 2.133790166  | 1.293760098  | 6.925680537 |
| C  | 1.510180115  | 0.251700020  | 7.607590564 |
| H  | 2.118150163  | -0.500350038 | 8.094460622 |
| C  | 0.132530013  | 0.150950012  | 7.637570572 |
| H  | -0.314870025 | -0.692970054 | 8.142070646 |
| C  | -0.652420048 | 1.108060085  | 7.011330521 |
| H  | -1.734440136 | 1.037820082  | 7.031440526 |
| C  | -0.039830002 | 2.159430169  | 6.345060486 |
| H  | -0.645490048 | 2.907090225  | 5.848620470 |
| C  | 1.343410106  | 2.259010172  | 6.307400476 |
| H  | 1.793210138  | 3.099240237  | 5.795900446 |
| C  | 13.194131028 | 3.601270275  | 0.920840069 |
| H  | 13.135351024 | 4.397220338  | 0.193800012 |
| C  | 12.062490931 | 3.246270251  | 1.619710126 |
| H  | 11.115430876 | 3.753250288  | 1.462720112 |
| N  | 12.041050945 | 2.237530174  | 2.556120199 |
| C  | 13.221571038 | 1.598240125  | 2.804230218 |
| H  | 13.183591034 | 0.818170062  | 3.557700275 |
| C  | 14.387901084 | 1.920390148  | 2.141530166 |
| H  | 15.301361189 | 1.395390107  | 2.383560181 |
| C  | 14.403601085 | 2.917730223  | 1.159820087 |
| C  | 15.653361217 | 3.128060240  | 0.438700031 |

|   |              |             |              |
|---|--------------|-------------|--------------|
| H | 16.433121250 | 2.449610186 | 0.743860056  |
| C | 15.941171250 | 4.051610311 | -0.548600044 |
| H | 15.189661186 | 4.767260367 | -0.845680067 |
| C | 17.160091302 | 4.106720317 | -1.283800098 |
| C | 17.287641329 | 5.025180385 | -2.360800183 |
| H | 16.513751247 | 5.754770462 | -2.515160192 |
| C | 18.356881426 | 4.969360382 | -3.201650248 |
| H | 18.412811439 | 5.638460425 | -4.051030311 |
| C | 19.423301485 | 4.064680312 | -2.962370229 |
| H | 20.283811585 | 4.063780313 | -3.622250279 |
| C | 19.367241505 | 3.204310247 | -1.856730140 |
| H | 20.192451567 | 2.536740194 | -1.650220127 |
| C | 18.249041400 | 3.206320248 | -1.035390079 |
| H | 18.188961420 | 2.534770194 | -0.195110017 |
| C | 6.007680462  | 5.210600399 | 6.566700503  |
| H | 5.111960394  | 5.683950459 | 6.188670458  |
| C | 7.250630559  | 5.764080436 | 6.313760499  |
| H | 7.386330550  | 6.687120501 | 5.762510420  |
| N | 8.404570661  | 5.143540396 | 6.688160493  |
| C | 8.303050651  | 3.985510304 | 7.415420587  |
| H | 9.246000693  | 3.521350270 | 7.689530592  |
| C | 7.091130556  | 3.409950262 | 7.721210582  |
| H | 7.066830525  | 2.490310192 | 8.288100653  |
| C | 5.914690472  | 3.998280309 | 7.238300570  |
| C | 4.597410356  | 3.281330255 | 7.221290538  |
| H | 3.799890293  | 4.013190307 | 7.169860542  |
| C | 4.245090324  | 2.161030168 | 8.207820654  |
| H | 5.143650396  | 1.661830127 | 8.574070684  |
| C | 3.358180259  | 2.465970187 | 9.398460733  |
| C | 3.472670265  | 1.663900126 | 10.531070811 |
| H | 4.263920330  | 0.926460069 | 10.580710812 |
| C | 2.579920200  | 1.801780137 | 11.581340910 |
| H | 2.679220205  | 1.170720090 | 12.453560962 |
| C | 1.562460123  | 2.741920210 | 11.510830899 |
| H | 0.843260065  | 2.831940219 | 12.314550967 |
| C | 1.456890114  | 3.561510272 | 10.397990777 |
| H | 0.661370049  | 4.293390332 | 10.340220814 |
| C | 2.346340182  | 3.424380264 | 9.346660736  |
| H | 2.239290170  | 4.059440314 | 8.478970653  |
| C | 13.836121087 | 6.421740492 | 3.435020262  |
| H | 14.180391105 | 7.175980529 | 2.741140208  |
| C | 12.547110980 | 6.494580523 | 3.922470302  |
| H | 11.861280913 | 7.287300584 | 3.637360280  |
| N | 12.044540922 | 5.581650442 | 4.806280368  |
| C | 12.881991012 | 4.591340354 | 5.242780403  |
| H | 12.464900966 | 3.888870299 | 5.958670446  |
| C | 14.180041108 | 4.476330347 | 4.792390370  |
| H | 14.803101121 | 3.680490284 | 5.176130396  |
| C | 14.678561108 | 5.382400391 | 3.847460295  |
| C | 16.049681215 | 5.170520398 | 3.363570257  |
| H | 16.551601285 | 4.345400333 | 3.840960295  |
| C | 16.716161280 | 5.876540444 | 2.430530187  |



|   |              |             |             |
|---|--------------|-------------|-------------|
| H | 16.211801227 | 6.706020490 | 1.956320150 |
| C | 18.127831393 | 5.707680460 | 2.051970160 |
| C | 18.719621423 | 6.676850494 | 1.237830095 |
| H | 18.103351389 | 7.462820581 | 0.818940063 |
| C | 20.097961572 | 6.672190506 | 1.020850076 |
| H | 20.550201582 | 7.445620574 | 0.414350030 |
| C | 20.882291580 | 5.696350458 | 1.596550123 |
| H | 21.956281678 | 5.701570421 | 1.455690114 |
| C | 20.294881550 | 4.693360362 | 2.374000182 |
| H | 20.912141622 | 3.925340301 | 2.821060218 |
| C | 18.940411476 | 4.695570360 | 2.596460201 |
| H | 18.500561410 | 3.922120299 | 3.208680246 |

**CI(T<sub>ARPP</sub>/T<sub>BRPP</sub>)**

|    |              |              |             |
|----|--------------|--------------|-------------|
| Ag | 10.258280786 | 1.616110123  | 3.547040275 |
| Ag | 10.187740771 | 5.602120447  | 5.709520462 |
| C  | 6.234370470  | 2.797620217  | 4.424720341 |
| H  | 5.709200416  | 3.705650286  | 4.176980323 |
| C  | 7.491880561  | 2.604360198  | 3.896710298 |
| H  | 7.949160614  | 3.347030256  | 3.249570248 |
| N  | 8.242290625  | 1.491940116  | 4.180490324 |
| C  | 7.654590606  | 0.536360042  | 4.957170382 |
| H  | 8.250840648  | -0.357510027 | 5.122790393 |
| C  | 6.397140471  | 0.694080056  | 5.531500420 |
| H  | 6.013070450  | -0.091320007 | 6.167920466 |
| C  | 5.673840422  | 1.862950143  | 5.306770432 |
| C  | 4.387450339  | 2.283240177  | 5.999900445 |
| H  | 3.760360287  | 2.739530213  | 5.243390402 |
| C  | 3.633360282  | 1.346700101  | 6.970920535 |
| H  | 3.971280305  | 0.311120027  | 6.929100557 |
| C  | 2.115270163  | 1.341520101  | 6.897390510 |
| C  | 1.463930113  | 0.303280022  | 7.558200600 |
| H  | 2.050980160  | -0.468990036 | 8.038870604 |
| C  | 0.084210008  | 0.232600019  | 7.574570592 |
| H  | -0.386240029 | -0.608270049 | 8.062620609 |
| C  | -0.674040050 | 1.216100093  | 6.955800513 |
| H  | -1.757140136 | 1.169630091  | 6.965410530 |
| C  | -0.033300002 | 2.263530176  | 6.310790491 |
| H  | -0.617850047 | 3.031770233  | 5.820460462 |
| C  | 1.351610104  | 2.332680180  | 6.286570472 |
| H  | 1.824060139  | 3.170010243  | 5.791320470 |
| C  | 13.221791017 | 3.489650267  | 0.959780074 |
| H  | 13.165430994 | 4.275840328  | 0.221230016 |
| C  | 12.087040946 | 3.140640244  | 1.654330130 |
| H  | 11.139760858 | 3.641050280  | 1.482520115 |
| N  | 12.063940930 | 2.144850166  | 2.601470202 |
| C  | 13.241401003 | 1.508770117  | 2.869880222 |
| H  | 13.197851038 | 0.737340058  | 3.632730280 |
| C  | 14.415481115 | 1.827230139  | 2.213240171 |
| H  | 15.329261160 | 1.307370103  | 2.469200190 |
| C  | 14.430321097 | 2.814320215  | 1.219910095 |

|   |              |             |              |
|---|--------------|-------------|--------------|
| C | 15.676681211 | 3.033270233 | 0.498510041  |
| H | 16.472811290 | 2.376890183 | 0.811270062  |
| C | 15.927961240 | 3.942990304 | -0.500170038 |
| H | 15.146891175 | 4.627010356 | -0.799920062 |
| C | 17.138131293 | 4.036490309 | -1.251220094 |
| C | 17.204851336 | 4.948330380 | -2.342780179 |
| H | 16.391281269 | 5.637280412 | -2.495180189 |
| C | 18.262551401 | 4.932720382 | -3.196840244 |
| H | 18.274951400 | 5.593900419 | -4.056300314 |
| C | 19.381491508 | 4.079520315 | -2.962730229 |
| H | 20.231231581 | 4.114130317 | -3.636550278 |
| C | 19.383281503 | 3.229400250 | -1.845070143 |
| H | 20.242941533 | 2.604770199 | -1.642530128 |
| C | 18.277481396 | 3.188070247 | -1.006600079 |
| H | 18.263141381 | 2.524810194 | -0.156070013 |
| C | 6.044250473  | 5.196340400 | 6.611470486  |
| H | 5.153610396  | 5.687490443 | 6.244830505  |
| C | 7.291510559  | 5.742550436 | 6.370810516  |
| H | 7.435370570  | 6.675960524 | 5.839990436  |
| N | 8.438520662  | 5.103890394 | 6.730320521  |
| C | 8.327610667  | 3.930630300 | 7.431640558  |
| H | 9.265850714  | 3.451570264 | 7.695480608  |
| C | 7.110010542  | 3.361020258 | 7.727620612  |
| H | 7.076980568  | 2.430170188 | 8.275200635  |
| C | 5.939270438  | 3.972240306 | 7.258020572  |
| C | 4.611990353  | 3.274180250 | 7.228590538  |
| H | 3.827390296  | 4.020220310 | 7.186840570  |
| C | 4.236330324  | 2.146030168 | 8.198900631  |
| H | 5.122840395  | 1.624630126 | 8.559670660  |
| C | 3.352050259  | 2.449370188 | 9.391010711  |
| C | 3.448800265  | 1.628140126 | 10.511410818 |
| H | 4.224790323  | 0.874260067 | 10.550880826 |
| C | 2.557740196  | 1.767890133 | 11.562830872 |
| H | 2.642760204  | 1.121800088 | 12.425620932 |
| C | 1.560030120  | 2.729640208 | 11.505570877 |
| H | 0.842350065  | 2.822330217 | 12.310000942 |
| C | 1.472410115  | 3.568020274 | 10.405050795 |
| H | 0.692410052  | 4.317000332 | 10.357650801 |
| C | 2.359880182  | 3.428640263 | 9.352630702  |
| H | 2.266880175  | 4.079080315 | 8.494880632  |
| C | 13.856631045 | 6.461360522 | 3.481690266  |
| H | 14.197141100 | 7.242380579 | 2.816430219  |
| C | 12.573960957 | 6.520200481 | 3.985350308  |
| H | 11.890010899 | 7.327880541 | 3.740420290  |
| N | 12.076260917 | 5.574790453 | 4.835040374  |
| C | 12.910880968 | 4.561760352 | 5.221310401  |
| H | 12.497310956 | 3.832150293 | 5.911510435  |
| C | 14.203791112 | 4.457130341 | 4.751520366  |
| H | 14.825891145 | 3.641910278 | 5.094370389  |
| C | 14.696441107 | 5.400770409 | 3.840280297  |
| C | 16.059821256 | 5.208510403 | 3.327840257  |
| H | 16.568551255 | 4.361690335 | 3.758360288  |

|   |              |             |             |
|---|--------------|-------------|-------------|
| C | 16.713071308 | 5.968160447 | 2.414950187 |
| H | 16.201811260 | 6.819560549 | 1.990100154 |
| C | 18.118931373 | 5.816550424 | 2.008880157 |
| C | 18.701861441 | 6.820550534 | 1.231900092 |
| H | 18.082981399 | 7.627520597 | 0.859130064 |
| C | 20.079371522 | 6.820610542 | 0.993790074 |
| H | 20.525091592 | 7.620060573 | 0.416920032 |
| C | 20.867271625 | 5.817740438 | 1.511130115 |
| H | 21.939071670 | 5.825510453 | 1.354270103 |
| C | 20.287041577 | 4.780150368 | 2.252170175 |
| H | 20.908741605 | 3.990540309 | 2.653770203 |
| C | 18.938091457 | 4.775830366 | 2.495010191 |
| H | 18.504981416 | 3.975810306 | 3.077940239 |

### [A...B]<sub>CT</sub> complex-2

|    |              |              |             |
|----|--------------|--------------|-------------|
| Ag | 10.191537089 | 1.443004899  | 3.421779723 |
| Ag | 10.211119663 | 5.652296663  | 5.654584667 |
| C  | 6.204261502  | 2.754300217  | 4.399344524 |
| H  | 5.690001177  | 3.670697012  | 4.154074928 |
| C  | 7.448286252  | 2.528492104  | 3.849263726 |
| H  | 7.904240927  | 3.258747447  | 3.186945391 |
| N  | 8.180055941  | 1.399792518  | 4.129497047 |
| C  | 7.595627560  | 0.465742767  | 4.936073222 |
| H  | 8.177795931  | -0.436068718 | 5.108864925 |
| C  | 6.347965299  | 0.652324161  | 5.529987820 |
| H  | 5.961965739  | -0.118661129 | 6.182605399 |
| C  | 5.641617232  | 1.833199613  | 5.298493359 |
| C  | 4.366025408  | 2.275775518  | 5.997908093 |
| H  | 3.727338716  | 2.711098165  | 5.239259644 |
| C  | 3.617703493  | 1.355334141  | 6.992920709 |
| H  | 3.959203432  | 0.325303131  | 6.978507985 |
| C  | 2.100080262  | 1.344676115  | 6.924011248 |
| C  | 1.448203791  | 0.286858287  | 7.557838960 |
| H  | 2.034527711  | -0.486858219 | 8.037536866 |
| C  | 0.064800014  | 0.204171712  | 7.554852442 |
| H  | -0.408862234 | -0.643247390 | 8.029195392 |
| C  | -0.694178187 | 1.189706954  | 6.934411433 |
| H  | -1.776711555 | 1.133290172  | 6.927820953 |
| C  | -0.052562837 | 2.252937937  | 6.309196398 |
| H  | -0.636852955 | 3.021181867  | 5.817554961 |
| C  | 1.333996042  | 2.336768990  | 6.309946454 |
| H  | 1.804410116  | 3.186364154  | 5.833802555 |
| C  | 13.224523106 | 3.486827085  | 0.998405775 |
| H  | 13.189277943 | 4.299582807  | 0.287049907 |
| C  | 12.053023845 | 3.028100002  | 1.557578648 |
| H  | 11.095338333 | 3.473205819  | 1.300130762 |
| N  | 12.004672655 | 1.993982632  | 2.467700819 |
| C  | 13.196868568 | 1.423038671  | 2.821837061 |
| H  | 13.138464333 | 0.607005088  | 3.535840498 |
| C  | 14.406115312 | 1.856080152  | 2.311733726 |
| H  | 15.323580178 | 1.379688916  | 2.630526357 |

|   |              |             |              |
|---|--------------|-------------|--------------|
| C | 14.456072132 | 2.902012240 | 1.374570322  |
| C | 15.744052302 | 3.298045477 | 0.858441605  |
| H | 16.578672934 | 2.768947430 | 1.281184873  |
| C | 16.001176828 | 4.195685183 | -0.258546500 |
| H | 15.235839150 | 4.908478878 | -0.514379786 |
| C | 17.092587918 | 4.161758248 | -1.052541237 |
| C | 17.194943604 | 5.081693435 | -2.206253915 |
| H | 16.445545803 | 5.848911253 | -2.278750536 |
| C | 18.140098304 | 4.949405854 | -3.129398985 |
| H | 18.145465643 | 5.591157535 | -4.002260468 |
| C | 19.223173423 | 3.968021430 | -2.987712618 |
| H | 20.014272137 | 3.937784353 | -3.725995352 |
| C | 19.238729541 | 3.136242749 | -1.848070451 |
| H | 20.054970366 | 2.439174175 | -1.708353613 |
| C | 18.216041272 | 3.199164856 | -0.897607680 |
| H | 18.224001738 | 2.553202522 | -0.033574354 |
| C | 6.045599028  | 5.207434681 | 6.586860992  |
| H | 5.153601903  | 5.707018830 | 6.236056217  |
| C | 7.294923964  | 5.761994843 | 6.345861766  |
| H | 7.423244367  | 6.708306747 | 5.833119599  |
| N | 8.448186772  | 5.121961305 | 6.691973427  |
| C | 8.341528769  | 3.932954076 | 7.372153574  |
| H | 9.279166030  | 3.451051062 | 7.634311528  |
| C | 7.124579427  | 3.351194294 | 7.662293892  |
| H | 7.099639197  | 2.410631820 | 8.193720303  |
| C | 5.944858656  | 3.970112818 | 7.215664643  |
| C | 4.608153115  | 3.278395470 | 7.196767353  |
| H | 3.835270226  | 4.036100258 | 7.155247629  |
| C | 4.231001102  | 2.163210849 | 8.188080755  |
| H | 5.117710397  | 1.641167470 | 8.534693071  |
| C | 3.359714307  | 2.463419532 | 9.388223905  |
| C | 3.459497816  | 1.627639689 | 10.501940715 |
| H | 4.217122508  | 0.854092620 | 10.519744725 |
| C | 2.589975991  | 1.777156895 | 11.575407722 |
| H | 2.672564494  | 1.122335621 | 12.433237380 |
| C | 1.614078072  | 2.765823427 | 11.545481796 |
| H | 0.916132170  | 2.869123832 | 12.365670389 |
| C | 1.526118917  | 3.619249797 | 10.451957384 |
| H | 0.765270509  | 4.388933375 | 10.427190566 |
| C | 2.390922228  | 3.469288849 | 9.378741472  |
| H | 2.297599978  | 4.131705547 | 8.529509144  |
| C | 13.863436476 | 6.398357314 | 3.297155629  |
| H | 14.190631743 | 7.150387613 | 2.592789949  |
| C | 12.600805537 | 6.505779131 | 3.853979865  |
| H | 11.930049137 | 7.324952604 | 3.608241259  |
| N | 12.114876939 | 5.596613617 | 4.752308824  |
| C | 12.939369860 | 4.568987627 | 5.128945995  |
| H | 12.543661485 | 3.867323397 | 5.857408464  |
| C | 14.212157827 | 4.416800409 | 4.608423529  |
| H | 14.828675993 | 3.597967023 | 4.954127898  |
| C | 14.692778142 | 5.325252529 | 3.653775559  |
| C | 16.050259235 | 5.097740333 | 3.111733090  |

|   |              |             |             |
|---|--------------|-------------|-------------|
| H | 16.541040177 | 4.231526660 | 3.522929726 |
| C | 16.750205792 | 5.933893521 | 2.319276750 |
| H | 16.262678391 | 6.817258046 | 1.934252469 |
| C | 18.176862946 | 5.805450402 | 1.971634662 |
| C | 18.770498958 | 6.797857826 | 1.197721259 |
| H | 18.161289524 | 7.596490066 | 0.791431503 |
| C | 20.173479769 | 6.796358720 | 0.992396173 |
| H | 20.624305606 | 7.589491221 | 0.410376724 |
| C | 20.943448066 | 5.812655785 | 1.542815560 |
| H | 22.018822491 | 5.812664622 | 1.414737939 |
| C | 20.342217513 | 4.775543743 | 2.301879096 |
| H | 20.962945972 | 3.999262028 | 2.732056373 |
| C | 18.998222026 | 4.768415725 | 2.509822042 |
| H | 18.552587842 | 3.984997680 | 3.106000275 |

## Transition-2

|    |              |              |             |
|----|--------------|--------------|-------------|
| Ag | 10.168820779 | 1.352560104  | 3.396710263 |
| Ag | 10.275700772 | 5.621820446  | 5.643340444 |
| C  | 6.259300487  | 2.758420211  | 4.401200338 |
| H  | 5.766840466  | 3.687000286  | 4.158280321 |
| C  | 7.493760569  | 2.508740192  | 3.849780298 |
| H  | 7.967210638  | 3.226770250  | 3.184730245 |
| N  | 8.204750632  | 1.369120103  | 4.129810320 |
| C  | 7.607080596  | 0.454270034  | 4.944630378 |
| H  | 8.179390607  | -0.454960034 | 5.116470392 |
| C  | 6.370390508  | 0.667490053  | 5.537980407 |
| H  | 5.971170460  | -0.093010008 | 6.195150498 |
| C  | 5.681440412  | 1.853880145  | 5.300660392 |
| C  | 4.416420338  | 2.307850178  | 6.004370458 |
| H  | 3.768450290  | 2.745870212  | 5.252470406 |
| C  | 3.679000285  | 1.387480109  | 7.007590561 |
| H  | 4.041580312  | 0.363120026  | 7.008080526 |
| C  | 2.164850166  | 1.348090102  | 6.931690509 |
| C  | 1.531720116  | 0.282800021  | 7.564210571 |
| H  | 2.131010165  | -0.476110037 | 8.052540629 |
| C  | 0.155270014  | 0.169890012  | 7.548640589 |
| H  | -0.301610024 | -0.687740052 | 8.021610642 |
| C  | -0.617420048 | 1.132920086  | 6.919430531 |
| H  | -1.698550128 | 1.053710079  | 6.902400548 |
| C  | 0.003730001  | 2.204240168  | 6.297040508 |
| H  | -0.593830046 | 2.956580226  | 5.796500427 |
| C  | 1.383500108  | 2.318420177  | 6.309310488 |
| H  | 1.839100140  | 3.177190247  | 5.834700463 |
| C  | 13.188731039 | 3.450650263  | 1.119590085 |
| H  | 13.152911031 | 4.299420328  | 0.452210037 |
| C  | 12.018140904 | 2.937240226  | 1.611600125 |
| H  | 11.054180832 | 3.368590260  | 1.351430104 |
| N  | 11.965160895 | 1.858880145  | 2.466080187 |
| C  | 13.161080998 | 1.297560099  | 2.825620218 |
| H  | 13.094461022 | 0.443390034  | 3.492940267 |
| C  | 14.368461123 | 1.781960136  | 2.380260184 |

|   |              |             |              |
|---|--------------|-------------|--------------|
| H | 15.287891194 | 1.309240099 | 2.700570210  |
| C | 14.423851111 | 2.880620224 | 1.505830114  |
| C | 15.714671217 | 3.380200261 | 1.094590085  |
| H | 16.545151249 | 2.779980215 | 1.433240108  |
| C | 15.942761216 | 4.232580326 | -0.069110004 |
| H | 15.142731154 | 4.884210375 | -0.374730027 |
| C | 17.023821334 | 4.207990321 | -0.895010070 |
| C | 17.049921309 | 5.101120394 | -2.056760156 |
| H | 16.264121246 | 5.835340450 | -2.145300168 |
| C | 18.002801361 | 5.010280383 | -2.983240229 |
| H | 17.977941408 | 5.659260424 | -3.852140297 |
| C | 19.105691470 | 4.079960315 | -2.837640220 |
| H | 19.887791525 | 4.057930312 | -3.587220275 |
| C | 19.167351467 | 3.242260247 | -1.701770129 |
| H | 20.003211539 | 2.565760200 | -1.578410123 |
| C | 18.156841419 | 3.281600252 | -0.741240057 |
| H | 18.191001398 | 2.627300201 | 0.117500009  |
| C | 6.123530485  | 5.228760402 | 6.574220482  |
| H | 5.234390404  | 5.735090466 | 6.224760453  |
| C | 7.370040569  | 5.771270420 | 6.328410506  |
| H | 7.506690592  | 6.719440531 | 5.819840425  |
| N | 8.519320630  | 5.117460393 | 6.655430510  |
| C | 8.401300663  | 3.933140304 | 7.337860560  |
| H | 9.338670742  | 3.439800267 | 7.582450570  |
| C | 7.183530566  | 3.372440258 | 7.646140598  |
| H | 7.152370546  | 2.435540188 | 8.183730654  |
| C | 6.010080440  | 3.998400305 | 7.206820556  |
| C | 4.666590359  | 3.326930258 | 7.198110563  |
| H | 3.899350300  | 4.092340316 | 7.144790558  |
| C | 4.279240328  | 2.222030170 | 8.201770624  |
| H | 5.163640395  | 1.707230133 | 8.569920665  |
| C | 3.381140260  | 2.530190196 | 9.375650707  |
| C | 3.467480264  | 1.702290131 | 10.491010824 |
| H | 4.243120325  | 0.947130071 | 10.532580819 |
| C | 2.566570196  | 1.831640143 | 11.532640886 |
| H | 2.643650201  | 1.177260091 | 12.390380955 |
| C | 1.570680119  | 2.793170217 | 11.473350862 |
| H | 0.844540065  | 2.874500220 | 12.272270922 |
| C | 1.496290117  | 3.642260281 | 10.380550788 |
| H | 0.715920053  | 4.391200338 | 10.329720773 |
| C | 2.393140184  | 3.511980271 | 9.335900711  |
| H | 2.307750180  | 4.167870320 | 8.480600678  |
| C | 13.836141090 | 6.360940513 | 3.184170243  |
| H | 14.144591100 | 7.110940571 | 2.468570189  |
| C | 12.613170980 | 6.498900515 | 3.806870294  |
| H | 11.950050926 | 7.338170552 | 3.608010278  |
| N | 12.144190924 | 5.597730446 | 4.722010362  |
| C | 12.963130977 | 4.548790349 | 5.041520388  |
| H | 12.580680979 | 3.850440299 | 5.781320449  |
| C | 14.195821067 | 4.369600334 | 4.456470341  |
| H | 14.805171157 | 3.532730274 | 4.768060367  |
| C | 14.660141136 | 5.266450406 | 3.484600270  |

|   |              |             |             |
|---|--------------|-------------|-------------|
| C | 15.978941223 | 4.980370385 | 2.863660220 |
| H | 16.492651257 | 4.165890318 | 3.331290255 |
| C | 16.722011282 | 5.886450452 | 2.159510164 |
| H | 16.233251268 | 6.778010504 | 1.792390140 |
| C | 18.152701401 | 5.789150420 | 1.889450143 |
| C | 18.774591456 | 6.819420529 | 1.173820090 |
| H | 18.167471373 | 7.627900599 | 0.782760061 |
| C | 20.165871576 | 6.826830545 | 1.002440079 |
| H | 20.635151570 | 7.638760586 | 0.462370034 |
| C | 20.927161630 | 5.814520447 | 1.523200119 |
| H | 22.004231699 | 5.820360447 | 1.407880109 |
| C | 20.315071567 | 4.757570364 | 2.218700169 |
| H | 20.922881592 | 3.961440307 | 2.631010205 |
| C | 18.964011458 | 4.739350363 | 2.394880182 |
| H | 18.513051422 | 3.926960303 | 2.945890226 |

**STC(T<sub>BRPP</sub>/S<sub>0</sub>)**

|    |              |              |             |
|----|--------------|--------------|-------------|
| Ag | 10.146710960 | 1.230928629  | 3.354469081 |
| Ag | 10.361677364 | 5.602298409  | 5.654876244 |
| C  | 6.270184181  | 2.739733904  | 4.361020465 |
| H  | 5.794615392  | 3.682184741  | 4.116069725 |
| C  | 7.505597682  | 2.466625499  | 3.808228237 |
| H  | 7.997755596  | 3.180449121  | 3.144744506 |
| N  | 8.197353581  | 1.306010615  | 4.089705082 |
| C  | 7.577558221  | 0.395894894  | 4.907322959 |
| H  | 8.135619287  | -0.526996092 | 5.079792223 |
| C  | 6.340466275  | 0.635174013  | 5.500069091 |
| H  | 5.923454865  | -0.120152033 | 6.159728908 |
| C  | 5.672744496  | 1.841401230  | 5.263208608 |
| C  | 4.422080868  | 2.314754809  | 5.973887679 |
| H  | 3.776584623  | 2.772247623  | 5.227329025 |
| C  | 3.677780658  | 1.398014488  | 6.975589413 |
| H  | 4.024133539  | 0.365360314  | 6.963021930 |
| C  | 2.163457149  | 1.382495455  | 6.909808395 |
| C  | 1.517345116  | 0.317957108  | 7.543939908 |
| H  | 2.112053824  | -0.454550779 | 8.026287457 |
| C  | 0.134285326  | 0.222090410  | 7.534399371 |
| H  | -0.331390733 | -0.635875136 | 8.007116636 |
| C  | -0.633190218 | 1.201988708  | 6.911061116 |
| H  | -1.719432457 | 1.135587214  | 6.899046993 |
| C  | 0.000835952  | 2.273005132  | 6.287698255 |
| H  | -0.591799434 | 3.038626745  | 5.792245154 |
| C  | 1.388137024  | 2.370061944  | 6.293091523 |
| H  | 1.854433818  | 3.228905797  | 5.818738995 |
| C  | 13.135246565 | 3.514664200  | 1.257077912 |
| H  | 13.083708775 | 4.426779682  | 0.671230521 |
| C  | 11.960879216 | 2.908511289  | 1.656079738 |
| H  | 10.983619173 | 3.323825972  | 1.402079093 |
| N  | 11.935944860 | 1.762135627  | 2.427115676 |
| C  | 13.144074723 | 1.204443228  | 2.759886857 |
| H  | 13.088788295 | 0.296814175  | 3.362697549 |

|   |              |             |              |
|---|--------------|-------------|--------------|
| C | 14.352564744 | 1.779470431 | 2.382904086  |
| H | 15.286759231 | 1.318263672 | 2.693348094  |
| C | 14.372712745 | 2.966724247 | 1.646471901  |
| C | 15.687906013 | 3.674320305 | 1.400555729  |
| H | 16.484616123 | 2.954695460 | 1.571530507  |
| C | 15.826221887 | 4.264713217 | 0.034395108  |
| H | 15.049370211 | 4.939509319 | -0.282302621 |
| C | 16.904242093 | 4.171570951 | -0.827656745 |
| C | 16.928260654 | 5.038401688 | -1.990720942 |
| H | 16.150925523 | 5.788783594 | -2.083684780 |
| C | 17.911126907 | 4.946495273 | -2.925631273 |
| H | 17.893831436 | 5.597427227 | -3.797866650 |
| C | 18.983974987 | 4.029854982 | -2.761357504 |
| H | 19.780488508 | 3.997789011 | -3.502026246 |
| C | 19.025637271 | 3.195796712 | -1.620963668 |
| H | 19.859105726 | 2.511873202 | -1.484158342 |
| C | 18.008977283 | 3.249395128 | -0.667610367 |
| H | 18.037177615 | 2.599664951 | 0.201264878  |
| C | 6.182888827  | 5.218655900 | 6.560333760  |
| H | 5.294222157  | 5.746054225 | 6.227039989  |
| C | 7.438896848  | 5.751935818 | 6.311988231  |
| H | 7.582382148  | 6.712499683 | 5.819595469  |
| N | 8.591439922  | 5.074539742 | 6.619503344  |
| C | 8.460856757  | 3.872436038 | 7.284951460  |
| H | 9.397156523  | 3.361024306 | 7.515945796  |
| C | 7.230644169  | 3.322400749 | 7.593688390  |
| H | 7.190094480  | 2.373496733 | 8.118534112  |
| C | 6.055526764  | 3.973845645 | 7.176913257  |
| C | 4.701836046  | 3.322778545 | 7.176601149  |
| H | 3.942805298  | 4.101369890 | 7.134118270  |
| C | 4.304134827  | 2.213452133 | 8.176191360  |
| H | 5.185646326  | 1.679537954 | 8.532483650  |
| C | 3.417444825  | 2.522964688 | 9.357903848  |
| C | 3.496774464  | 1.679350784 | 10.469971636 |
| H | 4.266446167  | 0.911790450 | 10.502297063 |
| C | 2.595142333  | 1.809214246 | 11.518464281 |
| H | 2.665352231  | 1.143879056 | 12.373681339 |
| C | 1.605073920  | 2.786096578 | 11.469778122 |
| H | 0.878576661  | 2.866729914 | 12.273945027 |
| C | 1.537724822  | 3.650225229 | 10.380853530 |
| H | 0.761684995  | 4.410113959 | 10.337933816 |
| C | 2.435484376  | 3.520113487 | 9.328984152  |
| H | 2.354910578  | 4.186656001 | 8.475790139  |
| C | 13.863373927 | 6.282039286 | 3.085399362  |
| H | 14.129961043 | 6.991567444 | 2.307248446  |
| C | 12.667767520 | 6.464086526 | 3.771162080  |
| H | 11.992171266 | 7.296773862 | 3.562123779  |
| N | 12.237426135 | 5.601266461 | 4.749657588  |
| C | 13.081642232 | 4.568534609 | 5.092940775  |
| H | 12.733405131 | 3.902254747 | 5.884787248  |
| C | 14.291454773 | 4.361767891 | 4.452831453  |
| H | 14.914845311 | 3.533648556 | 4.775363806  |



|   |              |             |             |
|---|--------------|-------------|-------------|
| C | 14.691656869 | 5.191980345 | 3.392091149 |
| C | 15.953921247 | 4.810895355 | 2.636447480 |
| H | 16.547820260 | 4.231063444 | 3.339517495 |
| C | 16.769615538 | 5.943167088 | 2.114476186 |
| H | 16.248568409 | 6.803310362 | 1.715261958 |
| C | 18.177335343 | 5.883820230 | 1.914022997 |
| C | 18.830011396 | 6.938755978 | 1.205831673 |
| H | 18.223933157 | 7.746854564 | 0.801415692 |
| C | 20.209682531 | 6.945625016 | 1.055582826 |
| H | 20.687646165 | 7.760213168 | 0.518423600 |
| C | 20.979285801 | 5.918516106 | 1.588475085 |
| H | 22.061216415 | 5.926480594 | 1.482733231 |
| C | 20.359343488 | 4.855823625 | 2.273454001 |
| H | 20.967332957 | 4.056936469 | 2.691274630 |
| C | 18.999375739 | 4.826929542 | 2.429220198 |
| H | 18.543347454 | 4.002457978 | 2.966664794 |

### Product3

|    |              |              |             |
|----|--------------|--------------|-------------|
| Ag | 10.192569566 | 1.137142767  | 3.373558097 |
| Ag | 10.385328147 | 5.640917606  | 5.680876786 |
| C  | 6.301593179  | 2.658491205  | 4.348097713 |
| H  | 5.823623301  | 3.585754512  | 4.075065944 |
| C  | 7.533019541  | 2.370873321  | 3.810737056 |
| H  | 8.021242705  | 3.063226634  | 3.131597489 |
| N  | 8.219628821  | 1.226301963  | 4.120568033 |
| C  | 7.604126676  | 0.342824061  | 4.952094815 |
| H  | 8.157289783  | -0.570483195 | 5.152760775 |
| C  | 6.370493009  | 0.592550913  | 5.534505300 |
| H  | 5.957966588  | -0.142261758 | 6.209562905 |
| C  | 5.706995229  | 1.785400101  | 5.266613451 |
| C  | 4.448716687  | 2.274675237  | 5.958838090 |
| H  | 3.813854730  | 2.711744608  | 5.197188740 |
| C  | 3.691452661  | 1.380019233  | 6.967922058 |
| H  | 4.030650674  | 0.349186528  | 6.976152617 |
| C  | 2.176079709  | 1.371397534  | 6.892711101 |
| C  | 1.520153322  | 0.334215242  | 7.546868692 |
| H  | 2.101695137  | -0.426754143 | 8.050075774 |
| C  | 0.141499547  | 0.254473818  | 7.537443146 |
| H  | -0.336708182 | -0.577920305 | 8.031390314 |
| C  | -0.608274261 | 1.222433757  | 6.889458937 |
| H  | -1.689553422 | 1.167408033  | 6.875795792 |
| C  | 0.036481188  | 2.265816603  | 6.245079959 |
| H  | -0.542887067 | 3.021433136  | 5.731133860 |
| C  | 1.417864641  | 2.346438164  | 6.252347838 |
| H  | 1.893272687  | 3.182271777  | 5.760015614 |
| C  | 13.215941862 | 3.426115204  | 1.279953234 |
| H  | 13.178192315 | 4.334647425  | 0.697821852 |
| C  | 12.039119183 | 2.818035198  | 1.650518837 |
| H  | 11.074271522 | 3.234009437  | 1.375991057 |
| N  | 11.996779817 | 1.682784858  | 2.418035820 |
| C  | 13.185624980 | 1.120858396  | 2.766741481 |

|   |              |             |              |
|---|--------------|-------------|--------------|
| H | 13.121791016 | 0.218817491 | 3.366374865  |
| C | 14.397613445 | 1.691010501 | 2.416669352  |
| H | 15.319206898 | 1.234484054 | 2.748962633  |
| C | 14.434698398 | 2.880649720 | 1.699861609  |
| C | 15.758032159 | 3.602338250 | 1.610805608  |
| H | 16.541974016 | 2.864534108 | 1.729686542  |
| C | 16.104278495 | 4.625495396 | 0.503752387  |
| H | 15.198543426 | 5.038263488 | 0.078120964  |
| C | 17.028432796 | 4.279849364 | -0.647409020 |
| C | 16.941357897 | 5.075054457 | -1.795525277 |
| H | 16.173169647 | 5.833569399 | -1.848062857 |
| C | 17.824663948 | 4.926090140 | -2.836419191 |
| H | 17.744321824 | 5.556974484 | -3.711882015 |
| C | 18.847658769 | 3.970624744 | -2.764095827 |
| H | 19.559375181 | 3.879310834 | -3.573937846 |
| C | 18.945566932 | 3.154105519 | -1.632614516 |
| H | 19.733999757 | 2.417432071 | -1.562163101 |
| C | 18.038226180 | 3.307222300 | -0.574364546 |
| H | 18.127355186 | 2.679853603 | 0.299081921  |
| C | 6.186089978  | 5.196927618 | 6.525123629  |
| H | 5.302758157  | 5.713085847 | 6.178998474  |
| C | 7.435488259  | 5.741075037 | 6.294842306  |
| H | 7.567588839  | 6.696061798 | 5.801102576  |
| N | 8.582309022  | 5.088511767 | 6.627206894  |
| C | 8.457432240  | 3.896428421 | 7.292519065  |
| H | 9.390049884  | 3.401516505 | 7.545348313  |
| C | 7.237938930  | 3.330781271 | 7.582967259  |
| H | 7.204326438  | 2.390269831 | 8.110775685  |
| C | 6.066404531  | 3.962127756 | 7.146030843  |
| C | 4.714316707  | 3.299529539 | 7.140313771  |
| H | 3.958655988  | 4.074372283 | 7.080636019  |
| C | 4.306997374  | 2.207982737 | 8.152497554  |
| H | 5.181619906  | 1.680322290 | 8.522169615  |
| C | 3.414477601  | 2.534006829 | 9.328423860  |
| C | 3.482820081  | 1.707396691 | 10.445479672 |
| H | 4.241977958  | 0.938006150 | 10.489526111 |
| C | 2.583060131  | 1.856142346 | 11.486129752 |
| H | 2.641986315  | 1.204720178 | 12.346507187 |
| C | 1.609941377  | 2.839177586 | 11.425033910 |
| H | 0.889504658  | 2.939371636 | 12.225568278 |
| C | 1.553884223  | 3.686453953 | 10.329989648 |
| H | 0.792148613  | 4.452271446 | 10.277490079 |
| C | 2.446663113  | 3.534168033 | 9.285622734  |
| H | 2.375012000  | 4.188664064 | 8.429546768  |
| C | 13.928432513 | 6.259831146 | 3.130482068  |
| H | 14.198866271 | 6.943691879 | 2.339379972  |
| C | 12.729437943 | 6.452079706 | 3.797960151  |
| H | 12.058949466 | 7.272135475 | 3.555632949  |
| N | 12.294444613 | 5.617377474 | 4.781461585  |
| C | 13.128555119 | 4.597741695 | 5.153296768  |
| H | 12.773913491 | 3.948542056 | 5.948201098  |
| C | 14.339613766 | 4.377350272 | 4.537257169  |

|   |              |             |             |
|---|--------------|-------------|-------------|
| H | 14.954775174 | 3.556215388 | 4.873616014 |
| C | 14.746944408 | 5.186622563 | 3.471720651 |
| C | 15.991859975 | 4.752186452 | 2.722000762 |
| H | 16.702708642 | 4.408732959 | 3.464334083 |
| C | 16.643220017 | 5.629462665 | 1.626173540 |
| H | 16.196005074 | 6.614215540 | 1.526210539 |
| C | 18.152764108 | 5.778194334 | 1.682828955 |
| C | 18.746372392 | 6.894276302 | 1.055102296 |
| H | 18.113183555 | 7.664431504 | 0.635137362 |
| C | 20.106262511 | 7.001380772 | 0.975273659 |
| H | 20.547548234 | 7.856141308 | 0.481528990 |
| C | 20.930312616 | 6.003411007 | 1.519343581 |
| H | 22.006130228 | 6.081424592 | 1.447536445 |
| C | 20.375267913 | 4.923632011 | 2.144912238 |
| H | 21.007470099 | 4.157599698 | 2.573845748 |
| C | 18.978838634 | 4.799034873 | 2.225232820 |
| H | 18.560500735 | 3.929886155 | 2.707899728 |
